# Supplementary material for: Chemogenomic analysis of neuronal differentiation with pathway changes in PC12 cells
Source: Royal Society of Chemistry journal article supplement (doi:10.1039/c5mb00338e), 2015-11-05
Supplement: c5mb00338e2.xlsx [file c5mb00338e2.xlsx]

## Sheet: Supplementary Figure 1
Supplementary Figure 1A
Supplementary Figure 1B

## Sheet: Supplementary Figure 2
Supplementary Figure 2A
Supplementary Figure 2B

## Sheet: Supplementary Figure 3
Supplementary Figure 3A
Supplementary Figure 3B

## Sheet: Supplementary Figure 4
Supplementary Figure 4
	Geneset 1					Geneset 2					Geneset 3					Geneset 4
Transcript ID	ctrl	1hr	3hrs		Transcript ID	ctrl	1hr	3hrs		Trnscript ID	ctrl	1hr	3hrs		Transcript ID	ctrl	1hr	3hrs
7039741	8.83331	9.0785	7.91802		7385170	2.24836	3.2481	3.05983		7029638	5.66528	5.16277	4.8877		7214260	5.02555	4.61726	9.03043
7233023	8.23766	9.05313	8.72757		7317471	2.83967	3.0633	3.63247		7131912	5.21392	4.4458	4.87341		7101220	5.66337	3.75535	9.11897
7199523	8.51491	8.55567	9.35364		7077420	2.86599	3.57293	3.10343		7048947	5.47169	4.7226	5.17781		7120521	5.67134	4.30467	9.05568
7081124	8.19106	8.26737	9.02404		7035257	2.86579	3.76103	3.12301		7366722	5.28231	4.62208	5.09726		7039170	5.14773	3.14879	7.27155
7263775	8.30599	8.25573	9.04546		7109814	3.47076	2.81515	2.35011		7185324	5.08123	4.98937	4.49343		7314286	3.86299	2.6222	7.71187
7296563	8.3348	8.06076	9.97107		7269646	3.49615	2.80365	2.2932		7280406	5.17225	4.86453	4.35347		7139530	3.72988	4.26214	7.04927
7333634	8.42	7.01581	9.59318		7216317	3.34017	2.79978	2.38091		7299556	5.25865	5.02576	4.37819		7262941	4.07333	3.58484	6.71813
7178969	8.03876	6.76797	9.20427		7312677	3.55912	2.60394	2.40088		7330115	4.98314	4.34391	4.16286		7148827	5.25785	4.78369	6.80365
7199205	6.81785	7.24846	8.93914		7038805	3.35501	2.43912	3.07665		7343093	4.96622	4.79642	4.1376		7274003	5.19765	4.76345	6.68595
7268883	7.68635	7.52215	8.41484		7216926	3.10933	2.5193	2.80595		7059908	4.9841	4.74499	4.22236		7152929	4.83389	4.60289	6.86943
7062917	7.43424	7.43494	8.7791		7034888	3.25753	2.75198	2.63232		7081754	4.6705	4.77131	3.84504		7331581	4.98694	4.65591	6.52402
7233997	8.57244	7.94288	8.38318		7047547	3.78228	3.3621	3.05557		7359745	4.7566	4.84242	3.85623		7200444	4.79196	3.86631	6.20797
7069158	8.53271	7.83016	8.35341		7285948	3.69259	3.34181	3.0402		7285739	4.84792	4.57333	3.83718		7028549	4.30338	4.53073	6.00275
7217282	8.35848	7.3078	9.04879		7127587	3.86375	3.45664	3.14736		7186468	4.68745	4.58164	4.09843		7269203	4.80131	4.60413	5.83479
7306585	7.91204	7.30336	8.74049		7217815	3.63547	3.84748	2.98167		7172144	4.19585	4.80812	4.24774		7266497	4.6285	4.73414	5.95059
7202670	8.18279	7.17239	8.67633		7073458	3.75239	3.57664	3.16261		7142961	4.19991	5.10013	4.01351		7364446	4.64392	4.66584	6.12959
7263525	8.06738	7.79127	8.87155		7278220	3.18781	3.07432	2.5892		7131960	4.31317	5.07564	4.15059		7286823	4.7568	4.36482	5.95987
7363933	7.96214	7.7949	8.69937		7350927	3.38662	2.9625	2.50132		7320883	4.3876	5.23018	4.27095		7154650	4.61604	4.40489	5.87324
7084614	7.69782	7.84482	8.73847		7183857	3.68216	2.9777	2.98233		7132413	4.58	5.45739	4.6117		7098424	4.42276	4.20737	5.71616
7186897	7.86489	7.94411	8.80276		7162996	3.51464	3.47888	2.92068		7042447	4.58766	5.21439	4.7957		7293085	3.60378	5.48044	5.46495
7326630	7.69378	8.27325	8.9061		7280942	3.63343	3.20477	2.88554		7052227	4.52836	5.15592	4.51026		7197996	4.4405	4.52865	5.1863
7375727	7.9548	8.2697	8.63379		7071335	3.49917	3.1623	2.83672		7333072	4.26114	5.24245	4.61495		7069295	4.34404	4.80204	5.27783
7231889	7.89119	8.39925	8.56214		7226634	2.15111	2.36325	2.84293		7197150	5.56874	5.56691	4.35555		7118521	4.3527	4.56166	5.33946
7077026	7.48243	8.39376	8.26072		7335072	2.49573	2.12714	3.16838		7055421	5.28434	5.27491	4.23343		7199710	4.70459	4.3595	5.46335
7172368	7.51741	8.10783	8.08622		7206103	2.34394	2.22274	3.39855		7171533	5.25335	5.33112	4.4672		7282350	4.82485	4.67151	5.41904
7083616	7.6546	8.08291	8.27574		7350504	1.62695	2.01356	3.46809		7050691	5.29031	5.19377	4.34061		7275590	3.95567	5.01098	5.11436
7338277	7.20662	7.57159	7.93232		7055204	1.98285	2.76038	3.52741		7098920	5.40922	5.23631	4.40489		7346991	4.19992	4.8917	5.15323
7340397	7.47554	7.71088	8.07402		7312684	1.49306	3.55938	1.6978		7151297	5.39138	5.44624	4.06695		7117864	4.33614	5.03917	4.92019
7053629	7.49507	7.6077	8.12879		7038189	1.37467	2.47317	1.52031		7368000	5.47547	5.39225	3.90813		7161974	4.30415	5.01066	5.06051
7059293	8.42305	8.30035	6.9142		7036961	2.0975	2.76328	2.01811		7059866	5.46432	5.42516	3.86212		7026326	4.33924	5.01925	4.93452
7312214	8.09941	7.67498	7.29861		7108021	1.90918	2.55154	1.97805		7069228	4.94496	5.46185	4.05326		7234287	4.55012	5.33969	5.46844
7053895	7.45809	7.62776	6.70287		7060553	2.79022	0.758871	0.46627		7060259	5.18093	5.31955	4.18242		7337380	4.64412	5.08877	5.67426
7081853	7.41063	7.51009	6.63077		7035022	1.5669	0.50824	0.846185		7221921	4.92191	4.70111	3.5653		7200147	4.6365	4.85361	5.27407
7067702	7.50273	7.43813	6.75399		7252874	1.13195	0.359229	0.822199		7190677	4.82524	4.96892	3.71267		7173094	4.48004	5.05224	5.34758
7217249	7.16585	7.22642	6.4475		7241275	1.69459	1.32832	0.74765		7082318	4.9188	5.14499	3.90133		7314252	4.55474	5.04227	5.58523
7217541	7.16381	6.99852	6.37635		7229582	1.60977	1.4971	1.02398		7210088	4.93551	5.63514	3.52179		7130367	4.64288	5.02119	5.50332
7060053	7.10296	7.74676	7.53459		7226594	1.82762	0.675108	0.788047		7174531	5.12597	5.23329	3.61876		7323387	4.46866	5.92644	6.04398
7366871	6.84882	7.90409	6.99005		7048412	1.80145	0.822282	0.841051		7139682	4.97725	5.21311	3.83057		7112993	5.26539	6.00758	6.44539
7041354	6.70205	7.38728	7.154		7275140	1.76475	1.08181	0.428755		7069569	5.22504	2.53275	3.91349		7147187	5.30431	5.82656	6.16681
7225851	6.92965	7.63157	7.33023		7226619	1.87115	1.16993	0.798369		7058611	4.48933	3.28815	2.80053		7212700	4.90034	6.11481	6.51882
7077365	6.74927	7.51155	7.38579		7055382	3.74459	1.34323	2.50088		7067120	4.50779	2.64889	3.44419		7258494	5.14284	6.41646	6.18742
7174411	6.38518	7.73721	8.15961		7216240	3.03106	2.03275	1.70589		7131237	3.67117	2.97674	3.9893		7258550	5.12581	4.79974	6.11618
7301854	6.42727	7.22989	7.54172		7060667	3.22269	2.31361	1.90652		7229561	3.67229	2.98299	3.5363		7243648	4.99701	5.04889	6.23776
7346776	6.69636	7.13551	7.59999		7083754	2.91409	2.59707	2.26535		7123885	3.61036	2.94699	3.5351		7056205	4.91578	4.87014	5.72267
7067495	6.66708	7.07381	7.58145		7107824	2.78792	2.17478	2.43851		7034929	4.27327	2.99904	3.82493		7381555	5.0171	4.93898	5.91241
7289221	6.90494	7.26164	7.72591		7295340	2.84688	2.27021	2.23467		7382465	4.03612	2.50049	3.21945		7313363	5.06997	4.9565	5.73885
7114555	6.82513	7.49205	7.81386		7108028	3.03807	1.97262	2.14227		7060551	4.39755	3.16909	4.60604		7199594	4.86364	5.30915	5.92786
7322304	7.5262	6.83403	7.5999		7204681	3.09248	2.07756	2.43812		7166170	4.39304	3.22364	4.92787		7159665	5.15323	5.10621	5.95543
7222734	7.57361	6.85451	7.31295		7257710	3.44191	2.42572	2.43288		7094386	4.94875	3.63863	4.11779		7175050	5.21857	5.26624	5.91855
7110956	7.19127	6.77475	8.33295		7285438	3.28943	2.21846	2.375		7368815	4.55844	3.88048	4.11678		7250032	4.74855	5.22074	5.54463
7035407	7.39077	7.13422	8.05662		7036499	3.10442	2.20456	2.67854		7322066	4.67266	4.0417	4.22743		7041050	4.88775	5.23761	5.4943
7348389	7.10515	7.28136	8.03357		7243115	2.90508	2.30817	2.59674		7357073	4.67868	4.00142	4.0991		7296515	4.78857	5.51407	5.75597
7247754	6.95805	7.13818	7.89241		7364920	3.14104	2.43215	2.6216		7312123	4.65795	3.95604	4.63804		7316042	4.85797	5.54268	5.56822
7212722	7.15341	7.11816	7.77707		7055256	1.60413	0.961458	1.74467		7319366	5.00462	4.24479	4.94008		7254783	4.89734	5.47655	5.61707
7147197	6.99981	7.13926	7.78491		7039833	1.40873	1.37045	2.24909		7048696	4.80715	4.12885	4.45599		7358936	4.84131	5.56357	5.91335
7372849	6.29149	6.93895	7.07487		7253211	2.25872	1.80585	1.42849		7120368	4.9717	4.288	4.64178		7323355	4.97999	5.59093	6.12661
7149580	6.2592	6.9352	7.1362		7202569	2.25303	1.64384	1.41917		7152119	4.05609	3.95324	5.80299		7034329	5.0117	5.64735	5.62062
7261885	6.40449	7.01667	6.96185		7055334	2.2811	1.61187	0.881131		7087722	3.75671	3.90748	5.0901		7130724	5.2592	5.64466	5.85646
7095593	6.41799	7.01007	7.09309		7342728	2.09642	1.94223	1.04218		7206781	3.92183	3.89403	5.21743		7168489	5.13794	5.41326	5.80553
7357034	6.28435	6.75733	7.30138		7053952	1.8701	1.60331	1.23721		7282521	3.86648	4.06085	5.38668		7242044	5.09984	5.56263	5.71901
7070080	6.33854	6.68716	7.15641		7058637	1.8844	1.14627	1.35126		7343909	3.76204	3.91888	5.44107		7229023	5.10036	5.43131	5.72866
7212517	6.26343	6.59103	7.11116		7079725	2.20003	1.23275	1.0566		7162635	4.25943	4.12817	4.92773		7363174	5.43611	6.3284	5.85654
7208870	6.1079	6.67267	7.17221		7342629	2.08669	1.42897	1.18139		7232331	3.97867	4.01516	4.82678		7261089	5.57443	6.24749	5.8338
7082775	6.50672	6.24451	7.86271		7344396	2.17269	1.28766	1.46853		7197958	4.06662	3.96325	4.75856		7344605	5.21115	6.02444	5.9878
7296103	6.5761	6.47016	7.83343		7055280	2.11845	1.54707	1.48102		7171430	3.87943	3.99479	4.51356		7336159	5.39452	6.03212	5.9514
7325438	6.04517	6.52534	7.59002		7241236	2.09523	1.15419	1.5864		7225246	3.99372	3.78945	4.62179		7243247	4.89337	5.63512	5.24564
7067118	6.27142	6.03362	7.67089		7092388	2.25242	1.28064	1.76765		7158619	3.96849	3.79452	4.59211		7111227	5.07053	5.82971	4.86369
7250653	6.34182	6.21924	7.62678		7108046	2.11036	1.49952	1.6638		7374343	3.59443	4.55546	4.67058		7078833	4.94356	5.89315	5.03682
7199838	6.27168	6.876	7.6662		7107993	2.66325	1.08218	1.67779		7043235	3.76867	4.61321	4.5713		7194141	6.43014	6.72979	4.96517
7152208	6.85779	6.67373	7.76583		7108050	2.10701	1.46454	2.25985		7274799	3.89267	4.49836	4.43473		7225677	6.44494	6.26471	5.26234
7087533	6.72744	6.65991	7.31477		7253186	2.44499	1.42833	2.3273		7216519	4.15468	4.35142	5.13663		7082646	6.13651	6.22543	5.31187
7131725	6.60248	6.61933	7.53817		7259835	2.73823	2.05485	1.86379		7110360	4.13688	4.35852	4.85708		7063981	6.1205	6.41806	5.22477
	7.28147	7.39864	7.92712		7077638	2.69865	2.19001	2.03415		7294686	4.06023	4.50901	4.78705		7185072	5.6495	6.0787	4.35979
					7283418	2.41833	1.82739	2.10594		7362540	4.19161	4.40626	4.84748		7154722	5.62014	5.91467	4.64603
					7117344	2.63478	1.83907	2.27744		7271135	3.40803	3.45324	4.42164		7176216	5.94289	5.87908	5.29229
						2.62039	2.15509	2.13048		7375057	3.35756	3.08119	4.31666		7079228	5.86382	5.88401	5.20612
										7380334	3.29981	3.20594	4.16836		7216859	5.80914	5.8833	4.99439
										7314682	3.4323	4.01052	4.46941		7111091	5.77601	5.82793	5.07374
										7102957	3.65022	3.85653	4.29177		7084899	5.92014	6.01517	4.77044
										7198552	3.38068	4.12045	3.98515		7097556	5.86512	5.88949	4.88635
										7083746	3.70329	4.38458	4.06777		7079195	5.87566	6.28176	4.99165
										7188378	3.61806	4.3779	3.74355		7082163	5.87596	6.15867	5.11872
										7238623	3.3277	4.99642	3.63854		7094920	5.46681	5.43893	6.28981
										7347831	4.41695	4.45955	3.57764		7073975	5.50418	5.31097	6.16265
										7332794	4.38301	4.3207	3.72128		7270558	5.82651	5.15093	5.78734
										7059051	4.49647	4.08983	3.68297		7157294	6.16537	5.35277	5.9278
										7318588	4.4352	4.09253	3.65697		7215467	6.33317	5.52191	5.5688
										7048865	4.68452	4.20997	3.82312		7241852	6.11951	5.87397	5.5052
										7308065	4.70884	4.31077	3.88305		7236497	6.16607	5.91326	5.37515
										7293717	4.14585	4.30455	3.20402		7057323	6.15024	5.73693	5.49379
										7069492	4.09814	4.18494	3.48235		7266023	6.42251	5.56868	6.24921
										7062159	4.28278	3.99666	3.00452		7322049	6.43481	5.83915	5.98293
										7048952	4.06146	3.81459	3.36827		7281489	6.86639	5.75793	6.20365
										7195946	4.05622	3.73731	3.41974		7228630	5.6931	5.81717	6.41615
											4.46696	4.35622	4.23517		7198646	5.73153	6.0177	6.57301
															7339182	5.75061	5.99156	6.48223
															7181668	5.64959	5.92889	6.23958
															7308187	5.50833	5.73428	6.35556
															7072991	5.5449	5.91373	6.41116
															7205095	5.75619	5.49078	6.52989
															7377732	5.87265	5.72438	6.7069
															7290429	5.71677	5.92559	6.71245
															7151923	5.71364	5.74306	6.68427
															7374114	5.43004	5.84334	6.73483
															7137256	5.53322	5.66465	6.71161
															7148661	6.13687	5.79036	7.14663
															7338247	5.91878	6.09802	7.29638
															7260744	6.23335	6.23475	6.98756
															7082845	5.96856	6.25965	6.65773
															7091588	5.95032	6.0612	6.71812
															7204170	5.90681	6.26126	6.92523
															7346735	5.97897	6.22537	6.85824
															7336387	5.84552	6.23794	6.76077
															7036358	5.93513	6.18477	6.79415
															7362248	6.37709	6.98137	6.64006
															7316339	6.18839	6.71542	6.86287
															7345348	6.02384	6.80966	6.45198
															7198855	6.18202	6.84264	6.28969
															7068956	6.14381	6.85186	6.49955
															7114850	5.84464	6.52888	5.95735
															7329513	5.73025	6.762	6.62158
															7035638	5.81019	6.32645	6.46953
															7345821	5.93852	6.45051	6.64628
															7304077	5.95716	6.36707	6.55706
															7039650	6.35945	6.25006	5.68362
															7149849	6.58223	6.17561	5.84626
															7039277	6.63682	6.46762	5.56987
															7162107	6.58	6.51581	5.67649
															7331539	6.57263	6.58025	5.69632
															7233989	6.8137	6.21126	5.91159
															7248426	7.13771	6.41431	6.1258
															7103033	6.69961	6.57665	5.98194
															7055089	6.68104	6.78294	6.09198
															7210086	6.62146	6.82799	6.03007
															7100963	7.01786	6.73535	6.32889
															7127466	6.79643	6.6528	6.1868
															7291431	6.914	6.74518	6.32658
															7320920	6.74526	3.58187	6.06428
															7288744	7.48714	4.93064	5.64086
															7071036	5.85231	5.37121	7.705
															7317317	6.11711	5.29244	7.04557
															7132982	5.63072	5.50029	7.13467
															7043230	6.38076	4.58797	6.87869
															7048738	5.88629	4.59067	7.76651
															7075088	6.52435	5.13157	7.72792
															7279020	6.78582	5.77401	8.05597
															7144691	6.98747	5.80167	7.99364
															7210664	6.78575	6.19179	7.14631
															7046271	6.52944	6.27708	7.21884
															7031607	6.99615	6.15982	6.87039
															7066011	6.75131	5.78032	6.65189
															7190101	6.85514	5.74948	6.98022
																5.56178	5.57259	6.13029

## Sheet: Supplementary Figure 5
Supplementary Figure 5
Cellular Components
cell part	58.2952
macromolecular complex	15.05
synapse	10.0021
synapse part	9.02373
organelle	2.44588
cell	2.09201
extracellular region	2.01915
extracellular region part	0.582848
organelle part	0.489176
Biological Process
cellular process	20.8698
establishment of localization	18.8023
developmental process	17.3429
metabolic process	14.5456
biological regulation	8.54738
multicellular organismal process	4.74801
biological adhesion	4.65558
rhythmic process	3.51722
response to stimulus	2.37887
growth	1.31349
pigmentation	0.904845
multi-organism process	0.885386
locomotion	0.61296
immune system process	0.30648
reproduction	0.248103
localization	0.20432
reproductive process	0.116754
Molecular function
binding	38.0351
catalytic activity	23.6437
transporter activity	14.0264
transcription regulator activity	10.5741
molecular transdcer activity	4.02446
structural molecule activity	3.66936
enzyme regulator activity	2.35747
auxilary transport protein activity	1.10475
antioxidant activity	0.690471
chemoattractant activity	0.690471
proteasome regulator activity	0.493194
electron carrier activity	0.384691
translation regulator activity	0.30578

## Sheet: Supplementary Figure 6
Supplementary Figure 6
	cell part											synapse		macromolecular complex
	Egr1	Hmgcs1	Phlda1	Scn7a	Trim35	Vamp1	Gdf15	Dbc1	Nefm	Hspb1		Arc		Sdc1
	Btg2	Emp3	Mmp3	Dusp4	Pip4k2b	Zfp161	Ldlr	Bid	Klhl24	Zrsr1		Syt11		Gucy1a3
	Ier2	Olr1246	Mapkapk2	Sema6b	Ptch1	Hspa9	Tnfrsf12a	Cbx6	Zpf799	Pgpep1		Dmd		Gnaz
	Nr4a1	Shroom2	Sgms2	Adfp	Gpam	Giot1	Kcne4	Phyhipl	Hand1	Tmem110		Rph3a		Anxa2
	Egr3	Trib3	Lpar1	Pola2	Smad9	RGD1308127	Lysmd3	Ppp2cb	Eml5	Gnai3		Vamp1		Bcl10
	Arc	Zfand2a	Olr1326	Rph3a	Cbx7	Olr1087	Ppp1r15a	Anxa2	Slc36a1			Myh9		Myh9
	Junb	Olr1593	Cyb5r4	Apbb1	Syt11	Olr286	Hes1	Mmd	Zfp238			Plat		Gch1
	Olr1513	Olr189	Prkcd	Pias3	Dnaja2	Sc4mol	PVR	Ralgds	Gucy1a3			Nefm		Apbb1
	Jun	Cdkn1a	Map2k1ip1	Tspyl4	Armcx6	Olr213	Obfc2a	Uhrf1	Pik3ip1			Pias3		Tnfrsf1a
	Olr175	Rgs5	Rnd1	Irs1	Tef	Idi1	Hmox1	Rpp25	Gata3			Apbb1
	Zfp36	Olr807	Tnfrsf1a	Dmtf1	Slc10a4	Bhlhb2	Dusp6	Ero1l	Wnt5a			Fmr1		extracellular region part
	Olr829	Olr830	Trpv2	Limk1	Klf5	Olr395	Ppp1r10	Tcp1	Ccdc47					Wnt5a
	Rhob	Slc2a1	Arl4a	Ncald	Ppm2c	Nr4a3	Olr321	Nefl	Myh9			synapse part		Akr1b1
	Olr322	Hmgcr	Sat1	Ehd4	Ccr4	Wdr1	Krt8	Fen1	Nr1d1			Arc		Car2
	Fosl1	Bcl10	Akr1b1	Dctd	Cdon	Gpr37	MGC109340	Fbxl20	Rhobtb2			Syt11		Il11
	Serpine1	Cited2	Odc1	Abhd5	Smpd3	Trim25	Arf2	Amacr	Prpf19			Arrb2		Mmp3
	Egr2	Chchd2	Tars	Anxa5	Lef1	Bag3	Hmga1	Alcam	Wrb			Rab3a		Vgf
	Dusp5	Stk40	Stat3	Zbtb38	Chek2	Coq10b	S100a10	Rpl14	Slc7a2			Apbb1		Plat
	Errfi1	Sqle	Tacstd1	Cant1	Txnip	Crem	Itpkc	St3gal4	Rab3a			Fosl1		Stc1
	Vgf	Olr203	Mgat1	Hk2	Tia1	Por	P2ry12	Prkcz	Tyms					Crh
	Klf6	M6pr	Plat	Nrg2	Olr1144	Ccnd1	Egln3	Glrx1	Ugcg					Mmp10
	Atf3	Cited1	Gnaz	Sirpa	Rap1b	Cyp51	Lgals3	Gclc	Fbxo32					Lif
	Krt18	Snf1lk	Sh2b3	Gch1	Arrb2	Car2	Vhl	Lxn	Ik					Lgals3
	Insig1	Olr1614	Ctsl1	Kcnj12	Dmd	Sdc1	Lgals8	Rdh10	Fmr1					Gdf15
														Anxa2
	developmental process				metabolic process				biological regulation
	Sdc1	Cga	Hand1		Pola2	Tyms	Lef1		Ralgds	Ehd4	Phlda1	Olr829	Nefm	Klf5	Ppp1r15a
	Arc	Dclk1	Vhl		Fen1	Hmgcs1	Btg2		Arc	Dbc1	Rhob	Olr322	Gch1	Crem	Hes1
	Prkcd	Phlda1	Nr4a3		Gucy1a3	Lysmd3	Nr4a1		Prkcz	Bid	Sertad1	Olr321	Txnip	Il11	Bhlhb2
	Smpd3	Rhob	Tnfrsf1a		Arrb2	Gpam	Egr3		Prkcd	Anxa2	Vgf	Olr286	Smad9	Gata3	Trib3
	Rab3a	Vgf	Klf5		Dctd	Hmgcr	Egr2		Gucy1a3	Stc1	Tnfrsf12a	Olr213	Nrg2	Mapkapk2	Fmr1
	Ptch1	Tnfrsf12a	Gata3		Prpf19	Amacr	Klf6		Sirpa	Arf2	PVR	Olr395	Tef	Snf1lk	Giot1
	Trim35	Dusp6	Snf1lk		Dmd	Hmox1	Atf3		Arrb2	Anxa5	Dusp6	Olr1246	Hand1	Stat3	Krt8
	Dmd	Ccdc47	Stat3		Abhd5	Slc7a2	Trib3		Rab3a	Crh	Tifa	Olr1593	Nr1d1	Lef1	Ccnd1
	Wnt5a	Krt18	Lef1		Akr1b1	Sat1	St3gal4		Rhobtb2	Rrad	Ccdc47	Olr189	Pias3	Cited2	Ldlr
	Bag3	Cdkn1a	Cited2		Rdh10	Mgat1	Sgms2		Ptch1	Cyp51	Gnai3	Olr807	Cbx7	Bcl10
	Car2	Mmd	Bcl10		Cyp51	Gch1	Ldlr		Cant1	Egln3	Krt18	Olr830	Zfp238	Egr1
	Dbc1	Cdon	Btg2		Egln3	Txnip			Trim35	Glrx1	Cdkn1a	Olr1087	Zpf799	Btg2
	Bid	Myh9	Egr3		Glrx1	Smad9			Prpf19	Ccr4	Cdon	Plat	Tia1	Nr4a1
	Anxa2	Hmgcr	Junb		Ero1l	Tef			Gnaz	Irs1	Myh9	Shroom2	Apbb1	Egr3
	Stc1	Cryge	Jun		Por	Nr1d1			Dmd	Sh2b3	Gpam	Rgs2	Uhrf1	Junb
	Crh	Plat	Egr2		Cyb5r4	Pias3			Wnt5a	Lpar1	Hmgcr	Rgs5	Vhl	Jun
	Egln3	Shroom2	Lif		Sqle	Cbx7			Limk1	Nefl	Gpr37	Hmox1	Ppp2cb	Zfp36
	Irs1	Hmox1	Ppp1r15a		Mmp10	Zfp238			Hspb1	S100a10	Olr1144	Slc7a2	Zbtb38	Fosl1
	Lgals3	Cited1	Hes1		Mmp3	Uhrf1			Rap1b	Cyb5r4	Olr1614	Cited1	Nr4a3	Serpine1
	Sh2b3	Odc1	Bhlhb2		Insig1	Vhl			Abhd5	Rnd1	Olr1326	Plk2	Dmtf1	Egr2
	Lpar1	Txnip	Trib3		Ppp1r10	Zbtb38			Akr1b1	Cga	Olr203	Sat1	Gclc	Klf6
	Nefl	Smad9	Fmr1		Sc4mol	Nr4a3			Bag3	Ppm2c	Olr1513	P2ry12	Hmga1	Atf3
	Rnd1	Nrg2	Krt8		Idi1	Crem			Car2	Arl4a	Olr175	Odc1	Tnfrsf1a	Lif
	Ccnd1	Sema6b
	response to stimulus					cellular process						pigmentation			locomotion
	Fen1	Sqle	Olr1593	Cited2		Fbxo32	Alcam	Ppm2c	Tspyl4	Gclc		Cited1			Ccr4
	Sdc1	Cga	Olr189	Bcl10		Sdc1	Ehd4	Phlda1	Plat	Tnfrsf1a					Nefl
	Prkcz	Trpv2	Olr807	Btg2		Arc	Hk2	Mmp10	Shroom2	Crem
	Prkcd	Mmp3	Olr830	Junb		Prkcz	Dbc1	Mmp3	Rgs2	Gata3		reproduction			localization
	Arrb2	Vgf	Olr1087	Jun		Prkcd	Bid	Vgf	Hmox1	Mapkapk2		Vgf			Adfp
	Rab3a	Insig1	Plat	Fosl1		Smpd3	Anxa2	Insig1	Azin1	Snf1lk		Stat3
	Ptch1	Slc2a1	Hmox1	Serpine1		Fbxl20	Tcp1	PVR	Pgpep1	Stat3					rhythmic process
	Prpf19	Ccdc47	Slc7a2	Egr2		Rpp25	Arf2	Dusp6	Plk2	Lef1		immune system process			Vgf
	Wnt5a	Hmgcs1	Dusp4	Klf6		Sirpa	Anxa5	Sc4mol	Sat1	Bcl10		Prkcd			Tef
	Chek2	Cdkn1a	Gch1	Lif		Arrb2	Crh	Idi1	Dusp4	Egr3		Ccr4			Nr1d1
	Hspb1	Olr1144	Txnip	Ppp1r15a		Rab3a	Dnaja2	Slc2a1	Dusp5	Junb		Slc7a2			Jun
	Akr1b1	Olr1614	Smad9	Krt8		Ptch1	RGD1308127	Gnai3	P2ry12	Jun		Egr1			Egr2
	Car2	Olr1326	Pias3	Ccnd1		Cbx6	Ccr4	Vamp1	Odc1	Zfp36
	Lxn	Olr203	Apbb1	Ldlr		Prpf19	Irs1	Hspa9	Nefm	Fosl1		multi-organism process			growth
	Anxa5	Olr1513	Uhrf1			Dmd	Ero1l	Hmgcs1	Gch1	Egr2		Gucy1a3			Cga
	Crh	Olr175	Vhl			Pip4k2b	Ctsl1	Hpdl	Txnip	Atf3		Bcl10			Emp3
	Egln3	Olr829	Ppp2cb			Chek2	Lgals3	Rpl14	Pias3	Lif		Junb			Serpine1
	Ccr4	Olr322	Nr4a3			Limk1	Nefl	Cdkn1a	Cbx7	Hes1		Fosl1
	Irs1	Olr321	Gclc			Tars	Cyb5r4	Cdon	Zpf799	Trib3		Krt8
	Ero1l	Olr286	Tnfrsf1a			Rap1b	Sqle	Myh9	Apbb1	Krt8
	Adfp	Olr213	Gata3			Snx16	Stk40	Gpam	Uhrf1	Ccnd1		reproductive process
	Nefl	Olr395	Stat3			Akr1b1	Rnd1	Hmgcr	Vhl	MGC109340		Crem
	Cyb5r4	Olr1246	Lef1			Car2	Dclk1	Amacr	Ppp2cb	Sgms2
										Ldlr
	binding									catalytic activity
	Pola2	Ptch1	Alcam	Irs1	Sertad1	Krt18	Uhrf1	Jun		Pola2	Egln3	Amacr	St3gal4
	Fen1	Cbx6	Ehd4	Ero1l	Errfi1	Cdkn1a	Vhl	Zfp36		Fen1	Glrx1	Plat	Mettl6
	Ralgds	Cant1	Porf1	Ctsl1	Ier3	Cdon	Ppp2cb	Fosl1		Fbxo32	Itpkc	Hmox1	Sgms2
	Fbxo32	Trim35	Hk2	Por	Vgf	Myh9	Zbtb38	Serpine1		Prkcz	Ero1l	Azin1
	Sdc1	Prpf19	Dbc1	Lgals3	Insig1	Hmgcr	Nr4a3	Egr2		Prkcd	Ctsl1	Pgpep1
	Prkcz	Gnaz	Bid	Sh2b3	Gdf15	Shroom2	Dmtf1	Klf6		Gucy1a3	Por	Plk2
	Prkcd	Dmd	Anxa2	Adfp	Tnfrsf12a	Hmox1	Gclc	Atf3		Smpd3	Cyb5r4	Sat1
	Gucy1a3	Rph3a	Stc1	Lpar1	PVR	Azin1	Hmga1	Lif		Rpp25	Sqle	Dusp4
	Syt11	Wnt5a	Lxn	Nefl	Arl5b	Plk2	Tnfrsf1a	Ppp1r15a		Rab3a	Stk40	Dusp5
	Slc10a4	Lrrc14	Tcp1	S100a10	Obfc2a	Sat1	Klf5	Hes1		Dctd	Dclk1	Mgat1
	Smpd3	Pip4k2b	Arf2	Cyb5r4	Dusp6	Odc1	Crem	Bhlhb2		Cant1	Ppm2c	Odc1
	Fbxl20	Chek2	Anxa5	Sqle	Ppp1r10	Gch1	Il11	Trib3		Prpf19	Mmp10	Gch1
	Kcnj12	Limk1	Crh	Stk40	Sc4mol	Txnip	Gata3	Fmr1		Gnaz	Mmp3	Pias3
	Ncald	Hspb1	Rdh10	Rnd1	Idi1	Smad9	Mapkapk2	Giot1		Pip4k2b	Dusp6	Zpf799
	RGD1310852	Tars	Dnaja2	Cga	Actrt2	Nrg2	Snf1lk	Krt8		Chek2	Sc4mol	Uhrf1
	Klhl24	Wdr1	Rrad	Dclk1	Tifa	Tef	Stat3	Ccnd1		Limk1	Idi1	Vhl
	Rpp25	Rap1b	Zrsr1	Trpv2	Zfand2a	Hand1	Lef1	Ldlr		Tars	Tyms	Ppp2cb
	Sirpa	Abhd5	RGD1308127	Trim25	Slc2a1	Nr1d1	Cited2			Rap1b	Hmgcs1	Gclc
	Arrb2	Snx16	Cyp51	Ppm2c	Ccdc47	Pias3	Bcl10			Akr1b1	Hpdl	Mapkapk2
	Rab3a	Akr1b1	Egln3	Arl4a	Tyms	Cbx7	Egr1			Car2	Cdkn1a	Snf1lk
	Rhobtb2	Bag3	Glrx1	Phlda1	Gnai3	Zfp238	Btg2			Ehd4	Myh9	Serpine1
	Dctd	Btbd10	Itpkc	Mmp10	Vamp1	Zpf799	Nr4a1			Hk2	Ugcg	Trib3
	Phlda3	Lgals8	M6pr	Mmp3	Zfp161	Tia1	Egr3			Rdh10	Gpam	Ccnd1
	Fgf11	Car2	Ccr4	Rhob	Hspa9	Apbb1	Junb			Cyp51	Hmgcr	MGC109340
	electron carrier activity				molecular transducer activity				transcription regulator activity				structural molecule activity
	Cyp51				Ptch1	Olr395			Sertad1	Fosl1			Dmd
	Glrx1				Cant1	Olr1246			Ppp1r10	Egr2			Nefl
	Ero1l				Gnaz	Olr1593			Cited1	Klf6			Rpl14
	Por				Wnt5a	Olr189			Smad9	Atf3			Krt18
	Cyb5r4				M6pr	Olr807			Nrg2	Hes1			Cryge
					Ccr4	Olr830			Tef	Bhlhb2			Nefm
					Irs1	Olr1087			Hand1	Trib3			Krt8
	enzyme regulator activity				Lpar1	Rgs2			Nr1d1
	Ralgds				Tnfrsf12a	Rgs5			Zbtb38				transporter activity
	Prkcd				PVR	Hmox1			Nr4a3				Syt11
	Anxa2				Gnai3	Plk2			Hmga1				Slc10a4
	Lxn				Mmd	P2ry12			Klf5				Kcnj12
	Ppp1r10				Gpr37	Nr1d1			Crem				Rph3a
	Cdkn1a				Olr1144	Nr4a3			Gata3				M6pr
	Azin1				Olr1614	Tnfrsf1a			Snf1lk				Trpv2
	Txnip				Olr1326	Stat3			Stat3				Slc2a1
	Bcl10				Olr203	Nr4a1			Lef1				Slc7a2
	Serpine1				Olr1513	Sema6b			Cited2				Scn7a
	Trib3				Olr175	Ldlr			Bcl10				Uhrf1
	Ccnd1				Olr829				Egr1				Slc36a1
					Olr322				Nr4a1				Ldlr
	auxiliary transport protein activity				Olr321				Junb				Kcne4
	Prkcz				Olr286				Jun
	Pias3				Olr213				Zfp36

## Sheet: Supplementary Figure 7
Supplementary Figure 7
rno04010 MAPK signaling pathway - Rattus norvegicus (rat)
rno:116596 Map3k8, D17TPL2, Tpl-2, Tpl2; mitogen-activated protein kinase kinase kinase 8 (EC:2.7.11.25); K04415 mitogen-activated protein kinase kinase kinase 8 [EC:2.7.11.25]
rno:116663 Dusp6, MGC93276; dual specificity phosphatase 6 (EC:3.1.3.16 3.1.3.48); K04459 dual specificity phosphatase [EC:3.1.3.16 3.1.3.48]
rno:140726 Cacng5; calcium channel, voltage-dependent, gamma subunit 5; K04870 calcium channel, voltage-dependent, gamma subunit 5
rno:140727 Cacng6; calcium channel, voltage-dependent, gamma subunit 6; K04871 calcium channel, voltage-dependent, gamma subunit 6
rno:170632 Fgf11; fibroblast growth factor 11; K04358 fibroblast growth factor
rno:170851 Map2k1, Mek1; mitogen activated protein kinase kinase 1 (EC:2.7.12.2); K04368 mitogen-activated protein kinase kinase 1 [EC:2.7.12.2]
rno:171337 Rap1b, MGC93206; RAP1B, member of RAS oncogene family; K07836 Ras-related protein Rap-1B
rno:24516 Jun; Jun oncogene; K04448 transcription factor AP-1
rno:24518 Jund, MGC72300; jun D proto-oncogene; K04449 transcription factor jun-D
rno:24525 Kras, Kras2, c-Ki-ras, p21; v-Ki-ras2 Kirsten rat sarcoma viral oncogene homolog; K07827 GTPase KRas
rno:24577 Myc, MGC105490, RNCMYC, c-myc, mMyc; myelocytomatosis oncogene; K04377 Myc proto-oncogene protein
rno:24667 Ppm1b, Pp2c2; protein phosphatase 1B, magnesium dependent, beta isoform (EC:3.1.3.16); K04461 protein phosphatase 1B (formerly 2C) [EC:3.1.3.16]
rno:24674 Ppp3ca, Calna1; protein phosphatase 3 (formerly 2B), catalytic subunit, alpha isoform (EC:3.1.3.16); K04348 protein phosphatase 3, catalytic subunit [EC:3.1.3.16]
rno:25388 Arrb2, BARRES, MGC105502; arrestin, beta 2; K04439 beta-arrestin
rno:25625 Tnfrsf1a, MGC105478, Tnfr1; tumor necrosis factor receptor superfamily, member 1a; K03158 tumor necrosis factor receptor superfamily, member 1A
rno:286993 Taok1; TAO kinase 1 (EC:2.7.11.1); K04429 thousand and one amino acid protein kinase [EC:2.7.11.1]
rno:289014 Mapkapk2; mitogen-activated protein kinase-activated protein kinase 2 (EC:2.7.11.1); K04443 mitogen-activated protein kinase-activated protein kinase 2 [EC:2.7.11.1]
rno:293508 Prkacb; protein kinase, cAMP dependent, catalytic, beta (EC:2.7.11.11); K04345 protein kinase A [EC:2.7.11.11]
rno:29387 Pla2g2c; phospholipase A2, group IIC (EC:3.1.1.4); K01047 phospholipase A2 [EC:3.1.1.4]
rno:300447 Ecsit, MGC94704; ECSIT homolog (Drosophila); K04405 evolutionarily conserved signaling intermediate in Toll pathways
rno:311406 Dusp2; dual specificity phosphatase 2; K04459 dual specificity phosphatase [EC:3.1.3.16 3.1.3.48]
rno:362045 Map2k1ip1, MGC106009, MP1, Mapksp1; mitogen-activated protein kinase kinase 1 interacting protein 1; K04370 mitogen-activated protein kinase kinase 1 interacting protein 1
rno:365355 Rras2, MGC109327; related RAS viral (r-ras) oncogene homolog 2; K07830 Ras-related protein R-Ras2
rno:501563 Prkx; protein kinase, X-linked (EC:2.7.11.1); K04345 protein kinase A [EC:2.7.11.11]
rno:60587 Dusp4, Mkp-2, Mkp2; dual specificity phosphatase 4 (EC:3.1.3.16 3.1.3.48); K04459 dual specificity phosphatase [EC:3.1.3.16 3.1.3.48]
rno:79240 Nr4a1, HMR, Ngfi-b, Nur77; nuclear receptor subfamily 4, group A, member 1; K04465 nuclear receptor, subfamily 4, group A, member 1
rno:81649 Mapk14, CRK1, CSBP, CSPB1, Csbp1, Csbp2, Exip, Hog, MGC105413, Mxi2, Prkm14, Prkm15, RK, Sapk2A, p38, p38Hog, p38alpha; mitogen activated protein kinase 14 (EC:2.7.11.24); K04441 p38 MAP kinase [EC:2.7.11.24]
rno04310 Wnt signaling pathway - Rattus norvegicus (rat)
rno:161452 Lef1; lymphoid enhancer binding factor 1; K04492 lymphoid enhancer-binding factor 1
rno:24516 Jun; Jun oncogene; K04448 transcription factor AP-1
rno:24577 Myc, MGC105490, RNCMYC, c-myc, mMyc; myelocytomatosis oncogene; K04377 Myc proto-oncogene protein
rno:24673 Ppp2cb, MGC94855, Pp2a2; protein phosphatase 2, catalytic subunit, beta isoform (EC:3.1.3.16); K04382 protein phosphatase 2 (formerly 2A), catalytic subunit [EC:3.1.3.16]
rno:24674 Ppp3ca, Calna1; protein phosphatase 3 (formerly 2B), catalytic subunit, alpha isoform (EC:3.1.3.16); K04348 protein phosphatase 3, catalytic subunit [EC:3.1.3.16]
rno:25445 Fosl1, Fra-1; fos-like antigen 1; K04502 fos-like antigen 1
rno:25537 Rock2, ROK; Rho-associated coiled-coil containing protein kinase 2 (EC:2.7.11.1); K04514 Rho-associated, coiled-coil containing protein kinase [EC:2.7.11.1]
rno:287280 Skp1, Skp1a; S-phase kinase-associated protein 1; K03094 S-phase kinase-associated protein 1
rno:289144 Cacybp, MGC93921; calcyclin binding protein; K04507 calcyclin binding protein
rno:293508 Prkacb; protein kinase, cAMP dependent, catalytic, beta (EC:2.7.11.11); K04345 protein kinase A [EC:2.7.11.11]
rno:501563 Prkx; protein kinase, X-linked (EC:2.7.11.1); K04345 protein kinase A [EC:2.7.11.11]
rno:58919 Ccnd1; cyclin D1; K04503 cyclin D1
rno:78973 Senp2, Axam; Sumo1/sentrin/SMT3 specific peptidase 2; K03345 sentrin-specific protease 2 (axin associating molecule) [EC:3.4.22.-]
rno:81762 Rock1, P160Rock; Rho-associated coiled-coil containing protein kinase 1 (EC:2.7.11.1); K04514 Rho-associated, coiled-coil containing protein kinase [EC:2.7.11.1]
rno04722 Neurotrophin signaling pathway - Rattus norvegicus (rat)
rno:170538 Prkcd, Pkcd; protein kinase C, delta (EC:2.7.11.13); K06068 novel protein kinase C [EC:2.7.11.13]
rno:170851 Map2k1, Mek1; mitogen activated protein kinase kinase 1 (EC:2.7.12.2); K04368 mitogen-activated protein kinase kinase 1 [EC:2.7.12.2]
rno:171337 Rap1b, MGC93206; RAP1B, member of RAS oncogene family; K07836 Ras-related protein Rap-1B
rno:24224 Bcl2, Bcl-2; B-cell CLL/lymphoma 2; K02161 apoptosis regulator BCL-2
rno:24516 Jun; Jun oncogene; K04448 transcription factor AP-1
rno:24525 Kras, Kras2, c-Ki-ras, p21; v-Ki-ras2 Kirsten rat sarcoma viral oncogene homolog; K07827 GTPase KRas
rno:24596 Ngfr, LNGFR, RNNGFRR, p75, p75NTR; nerve growth factor receptor (TNFR superfamily, member 16); K02583 nerve growth factor receptor (TNFR superfamily, member 16)
rno:25467 Irs1, IRS1IRM; insulin receptor substrate 1; K07187 insulin receptor substrate
rno:25576 Ywhah, 14-3-3e, MGC93547; tyrosine 3-monooxygenase/tryptophan 5-monooxygenase activation protein, eta polypeptide; K06630 tyrosine 3-monooxygenase/tryptophan 5-monooxygenase activation protein
rno:25578 Ywhaz, 14-3-3z; tyrosine 3-monooxygenase/tryptophan 5-monooxygenase activation protein, zeta polypeptide; K06630 tyrosine 3-monooxygenase/tryptophan 5-monooxygenase activation protein
rno:289014 Mapkapk2; mitogen-activated protein kinase-activated protein kinase 2 (EC:2.7.11.1); K04443 mitogen-activated protein kinase-activated protein kinase 2 [EC:2.7.11.1]
rno:316241 Nfkbie, MGC72568, Slc35b2; nuclear factor of kappa light polypeptide gene enhancer in B-cells inhibitor, epsilon; K05872 nuclear factor of kappa light polypeptide gene enhancer in B-cells inhibitor, epsilon
rno:58838 Sh2b3, Lnk; SH2B adaptor protein 3; K12459 SH2B adaptor protein 1/3
rno:81649 Mapk14, CRK1, CSBP, CSPB1, Csbp1, Csbp2, Exip, Hog, MGC105413, Mxi2, Prkm14, Prkm15, RK, Sapk2A, p38, p38Hog, p38alpha; mitogen activated protein kinase 14 (EC:2.7.11.24); K04441 p38 MAP kinase [EC:2.7.11.24]
rno04360 Axon guidance - Rattus norvegicus (rat)
rno:24511 Itgb1; integrin, beta 1; K05719 integrin beta 1
rno:24525 Kras, Kras2, c-Ki-ras, p21; v-Ki-ras2 Kirsten rat sarcoma viral oncogene homolog; K07827 GTPase KRas
rno:24674 Ppp3ca, Calna1; protein phosphatase 3 (formerly 2B), catalytic subunit, alpha isoform (EC:3.1.3.16); K04348 protein phosphatase 3, catalytic subunit [EC:3.1.3.16]
rno:25537 Rock2, ROK; Rho-associated coiled-coil containing protein kinase 2 (EC:2.7.11.1); K04514 Rho-associated, coiled-coil containing protein kinase [EC:2.7.11.1]
rno:25643 Gnai3, GIP3A; guanine nucleotide binding protein (G protein), alpha inhibiting 3; K04630 guanine nucleotide binding protein (G protein), alpha inhibiting activity polypeptide
rno:25686 Gnai1, BPGTPB; guanine nucleotide binding protein (G protein), alpha inhibiting 1; K04630 guanine nucleotide binding protein (G protein), alpha inhibiting activity polypeptide
rno:362993 Rnd1, MGC109441; Rho family GTPase 1; K07531 Rho family GTPase 1
rno:367072 Arhgef12, Larg; Rho guanine nucleotide exchange factor (GEF) 12; K07532 Rho guanine nucleotide exchange factor 12
rno:60629 Unc5a, Unc5h1; unc-5 homolog A (C. elegans); K07521 netrin receptor unc-5
rno:65172 Limk1; LIM domain kinase 1 (EC:2.7.11.1); K05743 LIM domain kinase 1 [EC:2.7.11.1]
rno:81762 Rock1, P160Rock; Rho-associated coiled-coil containing protein kinase 1 (EC:2.7.11.1); K04514 Rho-associated, coiled-coil containing protein kinase [EC:2.7.11.1]
rno:84609 Sema6b; sema domain, transmembrane domain (TM), and cytoplasmic domain, (semaphorin) 6B; K06842 semaphorin 6

## Sheet: Supplementary Figure 8
Supplementary Figure 8
Transcript ID	Gene Symbol	Ratio(1-h vs control)	Fold-Change(1-h vs control)
7169197	Egr1	0.00718011	-139.274
7111272	Btg2	0.0421389	-23.731
7179800	Ier2	0.0508855	-19.652
7320920	Nr4a1	0.111616	-8.95929
7133143	Egr3	0.12486	-8.00899
7328919	Arc	0.130978	-7.63488
7179739	Junb	0.13945	-7.17104
7069569	Olr1513	0.154717	-6.46341
7288744	Jun	0.169987	-5.88282
7055382	Olr175	0.189287	-5.28299
7049312	Zfp36	0.198913	-5.02733
7257708	Olr829	0.206145	-4.85096
7304448	Rhob	0.219643	-4.55284
7312684	Olr1087	4.18818	4.18818
7060553	Olr322	0.244626	-4.08787
7039170	Fosl1	0.250185	-3.99704
7101220	Serpine1	0.266459	-3.75292
7293085	Rpl14	3.67225	3.67225
7067120	Olr1387	0.275686	-3.62731
7222466	Egr2	0.27678	-3.61298
7189518	Plk2	0.280971	-3.55908
7029999	Sertad1	0.287817	-3.47443
7043230	Dusp5	0.288613	-3.46485
7281719	Errfi1	0.28919	-3.45793
7220503	Ier3	0.303617	-3.29362
7335234	Vof16	3.28732	3.28732
7149521	Klf2	0.311729	-3.20792
7238623	Orc4l	3.17933	3.17933
7097412	Vgf	0.315127	-3.17332
7107993	Olr1582	0.334233	-2.99192
7166280	Klf6	0.335687	-2.97897
7382465	Cxcr3	0.34493	-2.89913
7115455	Atf3	0.345786	-2.89196
7191382	Krt18	0.362859	-2.75589
7323387	Tra1	2.74686	2.74686
7270282	Prp15	2.70486	2.70486
7260283	Insig1	0.374316	-2.67154
7144218	Gdf15	0.37646	-2.65632
7333634	Ldlr	0.377828	-2.6467
7364823	Ncl	2.64046	2.64046
7075088	Tnfrsf12a	0.38083	-2.62584
7322501	Giot1	2.62069	2.62069
7356519	Kcne4	0.382486	-2.61447
7120521	Lif	0.387784	-2.57876
7187867	Lysmd3	0.388339	-2.57507
7174411	Hspa9	2.5527	2.5527
7051029	Ppp1r15a	0.402371	-2.48527
7094386	Hes1	0.403289	-2.47961
7363158	Cryge	0.405992	-2.4631
7331170	Twf1	2.45729	2.45729
7048738	PVR	0.407361	-2.45482
7358744	Zfp161	2.45072	2.45072
7160453	Arl5b	0.40995	-2.43932
7034929	Olr137	0.413449	-2.41868
7258494	Vamp1	2.41768	2.41768
7354355	Obfc2a	0.41421	-2.41423
7178969	Hmox1	0.41443	-2.41295
7314286	Dusp6	0.423141	-2.36328
7220449	Ppp1r10	0.423534	-2.36109
7060551	Olr321	0.426776	-2.34315
7212700	Gnai3	2.32053	2.32053
7058611	Olr286	0.434919	-2.29928
7378253	Fmr1	2.29759	2.29759
7158830		2.28206	2.28206
7290281	Hpdl	0.439293	-2.27639
7144691	Sc4mol	0.439579	-2.2749
7055526	Olr213	0.440203	-2.27168
7169450	Ik	2.25028	2.25028
7166170	Idi1	0.444608	-2.24917
7257144	Bhlhb2	0.447943	-2.23243
7226594	Olr395	0.44984	-2.22301
7281489	Srm	0.463787	-2.15616
7190101	Hmgcs1	0.46469	-2.15197
7051105	Emp3	0.465671	-2.14744
7293647	Actrt2	0.466287	-2.1446
7198992	Tifa	0.466487	-2.14368
7334965	Olr1246	0.466629	-2.14303
7038189	Olr300	2.14133	2.14133
7380771	Shroom2	0.467973	-2.13688
7274827	Anp32b	2.12877	2.12877
7197027	Anp32e	2.12229	2.12229
7246655	Trib3	0.472716	-2.11543
7285438	Ccl21b	0.475998	-2.10085
7096947	Zfand2a	0.476882	-2.09696
7287061	Mup4	0.477543	-2.09405
7108028	Olr1593	0.477826	-2.09281
7035022	Olr189	0.48008	-2.08299
7327842	Fbxo32	2.08187	2.08187
7275590	Ugcg	2.07817	2.07817
7366871	Tyms	2.07811	2.07811
7217282	Cdkn1a	0.482738	-2.07152
7312279	LOC100125365	0.483374	-2.06879
7334679	Rup2	0.487031	-2.05326
7329513	Myh9	2.0445	2.0445
7107605	Rgs5	0.493699	-2.02552
7253186	Olr807	0.49426	-2.02323
7257710	Olr830	0.494418	-2.02258
7204681	Ptger4	0.494854	-2.0208
7279020	Slc2a1	0.495922	-2.01645
7211447	Mllt11	0.495955	-2.01631
7202670	Hmgcr	0.496408	-2.01447
7083497	Ccdc47	2.01175	2.01175
7385170	Rpl10	1.99964	1.99964
7216240	Olr1687	0.500588	-1.99765
7051261	LOC494539	0.505145	-1.97963
7096263	Hsph1	1.97893	1.97893
7333072	Mre11a	1.97424	1.97424
7048412	Mif	0.50727	-1.97134
7087373	Olr1560	0.507979	-1.96859
7092388	Olr1542	0.509878	-1.96125
7066011	Dusp1	0.510157	-1.96018
7079725	Olr1492	0.511469	-1.95515
7053974	Olr27	0.511532	-1.95491
7347608	Tmod3	1.94853	1.94853
7374343	Smc1a	1.9467	1.9467
7156155	Dek	1.93143	1.93143
7078833	Ntn1	1.93131	1.93131
7138197	Jph4	0.518054	-1.9303
7025275		0.518288	-1.92943
7043276	Pdcd4	1.92891	1.92891
7241236	Olr502	0.520859	-1.9199
7094537	Ccdc50	1.90539	1.90539
7361933	Mstn	0.526164	-1.90055
7041467	Ifit3	0.526304	-1.90004
7200444	Bcl10	0.526442	-1.89954
7137590	Rnase1l1	0.526662	-1.89875
7092946	Retnlg	0.528375	-1.89259
7038805	Fgf15	0.530019	-1.88672
7077026	Canx	1.88077	1.88077
7060667	Olr377	0.532528	-1.87783
7314113	Btg1	0.534706	-1.87019
7025269	Cited2	0.535468	-1.86753
7142961	Wnt5a	1.86634	1.86634
7036499	Cacng3	0.535939	-1.86588
7035257	Olr247	1.85991	1.85991
7209539	Ift80	1.8575	1.8575
7182338	Cklf	0.538515	-1.85696
7363174	Idh1	1.85611	1.85611
7365598	Chchd2	0.540391	-1.85051
7035067	Fxc1	1.85037	1.85037
7344396	Olr1334	0.541476	-1.8468
7132413	Cab39l	1.83703	1.83703
7309296	Sel1l	1.82676	1.82676
7340977	Clasp2	1.81597	1.81597
7241143	Rtn4rl2	0.552068	-1.81137
7266023	Mat2a	0.553312	-1.8073
7258115	Mug1	0.555648	-1.7997
7279509	Stk40	0.555733	-1.79943
7232815	Chgb	1.79863	1.79863
7043235	Smc3	1.79569	1.79569
7320883	Acvr1b	1.79324	1.79324
7031607	Rpl18	0.560066	-1.7855
7362066	Sdpr	0.562512	-1.77774
7179997	Scoc	1.77212	1.77212
7317317	Sqle	0.56461	-1.77113
7312877	V1rg4	0.567082	-1.76341
7233023	Snap25	1.75987	1.75987
7125514	Chrna9	0.568247	-1.7598
7344605	Arhgef12	1.75721	1.75721
7056723	Thumpd1	1.75656	1.75656
7157294	Uqcrfs1	0.569354	-1.75638
7215467	Prkacb	0.569886	-1.75474
7259439	Capza3	0.57057	-1.75263
7284803	Pnrc1	0.571105	-1.75099
7301854	Dync1h1	1.74427	1.74427
7382506	Cited1	0.575579	-1.73738
7220337	Rnf39	0.575949	-1.73627
7117344	Ugt2b	0.57606	-1.73593
7236401	Zgpat	1.73539	1.73539
7028706	Vom2r31	0.578074	-1.72988
7234287	Itch	1.72856	1.72856
7345348	Ncam1	1.72407	1.72407
7169555	Pcdhb14	1.72328	1.72328
7221460	Snf1lk	0.581469	-1.71978
7113747	Nuf2	1.71804	1.71804
7331440	Vdr	0.582069	-1.71801
7092107	Hmgn1	1.71316	1.71316
7252874	Olr799	0.585311	-1.70849
7131912	Psme1	0.587184	-1.70304
7182872	Herpud1	0.589135	-1.69741
7189968	Emb	1.69673	1.69673
7131960	Irf9	1.69639	1.69639
7077365	Hspa4	1.69616	1.69616
7188378	Dhfr	1.6933	1.6933
7319366	Tspo	0.59057	-1.69328
7111227	Atp2b4	1.69252	1.69252
7235918	Vapb	1.69179	1.69179
7345937	Etfa	1.68359	1.68359
7315886	Arhgap9	0.594127	-1.68314
7231855	Ctdspl2	1.68236	1.68236
7048947	Pafah1b3	0.594984	-1.68072
7108448	RGD1305572	1.67922	1.67922
7213434	Ptbp2	1.67323	1.67323
7192885	Mfn1	1.67282	1.67282
7208932	Siah2	0.597819	-1.67275
7112993	Cacybp	1.67272	1.67272
7243247	Gjd2	1.67221	1.67221
7198552	Alg14	1.66991	1.66991
7058637	Olr303	0.599518	-1.66801
7295578	Ucn	0.599851	-1.66708
7119919	Msx1	0.599921	-1.66689
7318705	H1f0	0.602138	-1.66075
7287113	Zfp37	0.602672	-1.65928
7056707	Gp2	0.603665	-1.65655
7229681	Olr581	0.604498	-1.65427
7248426	Aurka	0.60567	-1.65106
7358936	Yes1	1.64976	1.64976
7254775	Rnf103	0.606385	-1.64912
7096380	Slc46a3	0.607425	-1.64629
7222734	Ddit4	0.607482	-1.64614
7122193	Sptbn1	1.64473	1.64473
7159775	Gata3	1.64462	1.64462
7028258	V1re10	0.609079	-1.64182
7120384	Pik3ip1	1.63888	1.63888
7198031	Clcc1	1.63588	1.63588
7364920	Alpi	0.611791	-1.63455
7270920	Recql	1.63445	1.63445
7068956	Myh10	1.63359	1.63359
7077420	Rad50	1.63234	1.63234
7249899	Ptpn12	1.63218	1.63218
7161974	Ddx46	1.63185	1.63185
7035427	Adm	0.613298	-1.63053
7183857	Olr1666	0.613672	-1.62954
7166400	Gdi2	1.62832	1.62832
7117864	Clock	1.62793	1.62793
7069158	Gabarap	0.614485	-1.62738
7225851	Spna2	1.62667	1.62667
7312123	Olr1063	0.614756	-1.62666
7210088	Gucy1a3	1.62409	1.62409
7048757	Zfp111	1.61943	1.61943
7131237	Olr1614	0.617953	-1.61825
7322304	Atp5d	0.618923	-1.61571
7346991	Tpm1	1.61527	1.61527
7072590	Arf2	0.619617	-1.6139
7325119	Rab21	1.6126	1.6126
7229561	Olr447	0.620158	-1.61249
7041354	Pten	1.60796	1.60796
7316042	Laptm4b	1.60737	1.60737
7170182	Eif1a	1.60726	1.60726
7114850	Enah	1.60685	1.60685
7120368	Atp5e	0.622569	-1.60625
7259835	Tuba3b	0.622702	-1.60591
7083746	Cacng4	1.60357	1.60357
7331605	Ddn	0.623674	-1.6034
7026326	Exoc3	1.60215	1.60215
7048696	Pvrl2	0.624905	-1.60024
7368815	Steap3	0.625045	-1.59989
7326749	Klf10	0.625226	-1.59942
7357073	B3gnt7	0.625357	-1.59909
7310664	Ankrd9	0.625743	-1.5981
7270558	Wbp11	0.62608	-1.59724
7255502	Vax2	0.626235	-1.59684
7261089	Cacna2d1	1.59446	1.59446
7220954	H2-Oa	0.627313	-1.5941
7270178	Ly49i4	1.59403	1.59403
7083901	Amz2	1.59284	1.59284
7055334	Olr144	0.628842	-1.59022
7199110	Dcm5	1.58929	1.58929
7225120	Il1rn	0.629452	-1.58868
7036961	Mylpf	1.58644	1.58644
7123885	Cxcl1	0.631407	-1.58377
7289719	Dio1	0.631488	-1.58356
7217094	Hmga1	0.631579	-1.58333
7031316	RGD1310111	0.631623	-1.58322
7198855	Camk2d	1.58076	1.58076
7366722	Mrlc2	0.632777	-1.58033
7342629	Olr1117	0.633881	-1.57758
7232474	Ttl	1.57738	1.57738
7114455	Kab	1.57668	1.57668
7302296	Zfp386	1.57539	1.57539
7334980	Vwa5a	1.57528	1.57528
7109814	Bcl2	0.634811	-1.57527
7324397	RGD1307947	1.57009	1.57009
7076436	MGC94725	1.57004	1.57004
7080663	Slfn8	1.56794	1.56794
7372849	Lamp2	1.56641	1.56641
7060053	Stip1	1.56243	1.56243
7288108	Psip1	1.56205	1.56205
7055256	Olr115	0.640527	-1.56121
7108050	Olr1601	0.640617	-1.561
7108021	Olr1589	1.56087	1.56087
7293359	Slc45a1	0.640673	-1.56086
7354795	MGC94335	0.641367	-1.55917
7244736	Zc3h8	1.55852	1.55852
7330115	Nhp2l1	0.642056	-1.5575
7336159	Rdx	1.55574	1.55574
7322518	Olr1083	0.643152	-1.55484
7034329	Gab2	1.55364	1.55364
7092952	Retnlb	0.644158	-1.55241
7244509	Itpripl1	0.644208	-1.55229
7241493	Olr715	0.644391	-1.55185
7067711	Slc36a1	1.55147	1.55147
7248966	Gmeb2	0.644822	-1.55081
7322066	Gadd45b	0.645748	-1.54859
7233997	Cox4i2	0.646374	-1.54709
7098339	RGD1310861	1.54544	1.54544
7132879	Stmn4	0.647118	-1.54531
7052227	Chrna7	1.54496	1.54496
7042447	Btrc	1.54406	1.54406
7255679	Tprkb	1.54137	1.54137
7309626	Eml5	1.54136	1.54136
7138227	Fam158a	1.54108	1.54108
7285561	Sit1	0.649773	-1.539
7067367	Olr1411	0.649775	-1.53899
7264786	Hoxa1	0.650641	-1.53695
7179857	LOC288913	0.650753	-1.53668
7208994	P2ry12	0.651673	-1.53451
7069161	MGC94192	0.652599	-1.53234
7077710	Hand1	1.53208	1.53208
7107824	Cd244	0.65377	-1.52959
7172144	Smad7	1.52866	1.52866
7261885	Pon2	1.52857	1.52857
7266726	Egr4	0.654718	-1.52737
7322000	Apba3	0.654747	-1.52731
7323355	Txnrd1	1.52726	1.52726
7194362	Selt	1.52714	1.52714
7108046	Olr1598	0.654821	-1.52714
7325371	Lyz2	0.655604	-1.52531
7306585	Egln3	0.655796	-1.52486
7314183	LOC500825	0.655993	-1.52441
7226272	Golga2	1.52216	1.52216
7274799	Ncbp1	1.52172	1.52172
7319736	Pim3	0.657433	-1.52107
7367969	Lonp1	1.52026	1.52026
7362248	Pgap1	1.52021	1.52021
7124093	Slc4a4	0.657869	-1.52006
7221031	Zbtb22	0.657878	-1.52004
7163789	Prpf4b	1.519	1.519
7233989	Id1	0.658644	-1.51827
7145933	Mtus1	1.51819	1.51819
7363526	Bard1	1.51568	1.51568
7118171	Cnga1	0.66016	-1.51478
7279113	Slfnl1	0.660525	-1.51395
7291119	Rpl37a_predicted	0.661118	-1.51259
7243115	Chrm5	0.661172	-1.51247
7218847	Kpna5	1.51247	1.51247
7322049	Map2k2	0.661741	-1.51117
7188156	Hapln1	0.662226	-1.51006
7210664	Lmna	0.662521	-1.50939
7072544	Hexim1	0.66317	-1.50791
7345054	Tagln	0.663207	-1.50783
7322695	Zpf799	1.50711	1.50711
7031211	Klk1b21	0.663693	-1.50672
7284496	Fhl5	0.663755	-1.50658
7283418	Cyp7a1	0.663906	-1.50624
7172368	Atp5a1	1.50569	1.50569
7128677	Slc1a4	0.664154	-1.50568
7216926	RT1-Ba	0.66433	-1.50528
7075496	Tpsab1	0.665224	-1.50325
7082695	Dnajc7	1.50021	1.50021
7138405	Gzmf	0.668569	-1.49573
7307646	Rtn1	1.49573	1.49573
7370427	Safb	1.49572	1.49572
7137230	Gmfb	1.49558	1.49558
7229558	Olr445	0.669067	-1.49462
7326630	Ywhaz	1.4943	1.4943
7257439	Vhl	0.669286	-1.49413
7314682	Ppp1r12a	1.49301	1.49301
7295340	Srd5a2	0.670511	-1.4914
7318818	Ddx17	1.48976	1.48976
7175139	Dpysl3	1.48925	1.48925
7173094	Rock1	1.48679	1.48679
7210794	Efna1	0.672596	-1.48678
7237652	Slc25a25	0.672762	-1.48641
7030264	Yif1b	0.67311	-1.48564
7169702	Ndfip1	1.48532	1.48532
7161621	Mak10	1.4853	1.4853
7079397	Pfn1	0.673334	-1.48515
7333382	Olr1191	0.673476	-1.48483
7047191	Lnpep	1.48402	1.48402
7297043	Myt1l	1.48317	1.48317
7195994	mrpl24	1.48198	1.48198
7061738	Ermp1	1.47888	1.47888
7104395	Ccdc93	1.47758	1.47758
7081883	Abi3	0.678365	-1.47413
7298926	Arf6	0.679169	-1.47239
7159019	Lgals8	0.679557	-1.47155
7107916	Pigm	0.679936	-1.47073
7082479	Krt20	0.680637	-1.46921
7064478	Lkap	1.46575	1.46575
7138366	Mcpt1	1.46388	1.46388
7335100	Scn3b	1.46295	1.46295
7338040	Myo5a	1.46288	1.46288
7244305	Cops2	1.46166	1.46166
7213318	Lppr4	0.684476	-1.46097
7340175	Rassf1	0.684784	-1.46032
7075083	Thoc6	0.685707	-1.45835
7174110	Syt4	1.45798	1.45798
7295541	Eif2b4	0.686114	-1.45748
7146933	Tacc1	1.45748	1.45748
7101275	Hspb1	0.686234	-1.45723
7186267	Slc7a5	0.687497	-1.45455
7163963	Wrnip1	1.45345	1.45345
7138313	Adcy4	0.68895	-1.45148
7252206	Mkln1	1.451	1.451
7037229	Armc5	0.690048	-1.44918
7217623	RGD1311257	1.44909	1.44909
7154935	MGC114246	0.690501	-1.44822
7309244	Gtf2a1	1.44769	1.44769
7352311	Slc25a27	0.69103	-1.44712
7029123	Prkd2	0.691512	-1.44611
7340407	Ihpk2	0.692662	-1.44371
7274931	Nr4a3	0.692955	-1.4431
7278590	Cyp4a1	0.692977	-1.44305
7298262	Srp54a	1.44272	1.44272
7378989	Zcchc12	0.693266	-1.44245
7241521	Olr737	0.694109	-1.4407
7039873	Glyat	0.694883	-1.43909
7250989	Tac1	0.695037	-1.43877
7254365	Grid2	0.695202	-1.43843
7147187	Polb	1.43619	1.43619
7375305	Dmd	1.43546	1.43546
7096708	Actb	0.697742	-1.4332
7236199	Adrm1	0.697784	-1.43311
7251998	Fam71f1	0.698026	-1.43261
7072410	G6pc3	0.698049	-1.43256
7180680	Pla2g15	1.43232	1.43232
7381097	Pir	1.43085	1.43085
7035638	Far1	1.43025	1.43025
7232493	Slc20a1	0.699217	-1.43017
7326261	Shmt2	0.699431	-1.42973
7135446	Dnajc3	1.42946	1.42946
7322494	Madcam1	0.700003	-1.42857
7150616	Sh3rf1	1.4284	1.4284
7039697	Cybasc3	0.700159	-1.42825
7334922	Olr1220	0.700798	-1.42694
7332206	Calcoco1	1.42691	1.42691
7345821	Cul5	1.42602	1.42602
7327745	Derl1	0.701254	-1.42602
7231536	Traf4af1	1.42595	1.42595
7079952	Unc119	0.70213	-1.42424
7077638	Nmur2	0.702887	-1.4227
7182786	Ccl22	0.703403	-1.42166
7352336	Mep1a	0.703445	-1.42157
7216852	Cyp21a1	0.704076	-1.4203
7034888	Olr91	0.704392	-1.41966
7244859	Fam113a	1.4186	1.4186
7156763	Ssr1	1.41623	1.41623
7079308	Slc16a13	0.706505	-1.41542
7069277	Eno3	0.706825	-1.41478
7255711	Tgfa	0.707967	-1.4125
7074098	Slc16a3	0.708901	-1.41063
7274290	Ubap1	0.708914	-1.41061
7038710	Slc22a18	0.709944	-1.40856
7348107	Hmgn3	1.40815	1.40815
7274318	Galt	0.71025	-1.40795
7380548	RragB	1.40749	1.40749
7221147	Tcp11	0.71067	-1.40712
7094048	Zfp148	1.40672	1.40672
7147145	Ap3m2	1.40662	1.40662
7060180	Slc3a2	0.711461	-1.40556
7079264	Slc2a4	0.711728	-1.40503
7269066	Wnk1	1.40502	1.40502
7119867	Wdr1	0.711811	-1.40487
7335410	Usp2	0.71275	-1.40302
7261780	Calcr	0.712936	-1.40265
7314252	Atp2b1	1.40204	1.40204
7187617	Erap1	1.40183	1.40183
7154942	Ctsql2	0.713648	-1.40125
7326269	Nxph4	0.714009	-1.40054
7336548	Cspg4	0.714024	-1.40051
7098583	P76	0.714536	-1.39951
7174562	Hbegf	0.714687	-1.39921
7282386	LOC500598	0.71532	-1.39797
7039287	Sf1	0.715553	-1.39752
7353455	Zap70	0.715801	-1.39704
7071036	Trim25	0.716429	-1.39581
7057283	Nupr1	1.39486	1.39486
7063113	Mgea5	1.39461	1.39461
7299338	Hif1a	1.39291	1.39291
7148930	Slc18a3	0.717957	-1.39284
7059690	Npas4	0.718182	-1.39241
7063839	Add3	1.39146	1.39146
7300914		0.718757	-1.39129
7178211	Dync1li2	1.39094	1.39094
7072329	Rnd2	0.719313	-1.39022
7048865	Atp1a3	0.719691	-1.38949
7093551	Tmem39a	0.719848	-1.38918
7290767	Cap1	1.38913	1.38913
7357034	Psmd1	1.38797	1.38797
7031293	Syt3	0.720629	-1.38768
7258220	Clec4a1	0.720729	-1.38748
7250032	Gnai1	1.38721	1.38721
7255695	Add2	0.7212	-1.38658
7137630	Rnase13	1.38649	1.38649
7209338	Ccnl1	0.721347	-1.3863
7137741	Chd8	1.38513	1.38513
7342952	Raver1	0.722152	-1.38475
7295379	Capn13	0.722422	-1.38423
7047485	Lilrb3	0.722591	-1.38391
7249784	Orc5l	1.38355	1.38355
7313174	Cry1	0.72323	-1.38269
7065631	Hagh	0.723262	-1.38262
7282293	Ccnl2	0.723434	-1.3823
7217445	Glp1r	0.723523	-1.38213
7050720	Atf5	0.723769	-1.38166
7361021	Ugcgl1	1.38152	1.38152
7329050	Pycrl	0.724018	-1.38118
7354030	RGD1310553	1.38051	1.38051
7152843	Tm2d2	0.724384	-1.38048
7169645	Rell2	0.724437	-1.38038
7280628	Id3	0.724964	-1.37938
7097931	Slc15a4	1.37918	1.37918
7218723	Pcbd1	1.37916	1.37916
7242044	Hsd17b12	1.37821	1.37821
7348125	Lca5	0.725603	-1.37816
7283161	Lypla1	1.37754	1.37754
7174465	Slc23a1	0.725936	-1.37753
7048315	Sepw1	0.726451	-1.37655
7301177	Ubr7	1.37632	1.37632
7029840	Tgfb1	0.726884	-1.37574
7197113	Txnip	1.37563	1.37563
7253939	Chn2	0.727082	-1.37536
7360234	Il17f	0.727812	-1.37398
7069295	Rabep1	1.37364	1.37364
7237530	Fnbp1	1.37324	1.37324
7162013	Slc34a1	0.728945	-1.37184
7211349	Snx27	1.37072	1.37072
7197704	St7l	1.3704	1.3704
7067146	Olr1392	0.729927	-1.37
7069561	Olr1511	0.729935	-1.36998
7246335	P22k15	0.731105	-1.36779
7362580	Trak2	1.36769	1.36769
7154173	Gpx1	0.731371	-1.3673
7029414	Rtn2	0.732008	-1.3661
7294686	Ppm1b	1.36488	1.36488
7329540	Txn2	0.7332	-1.36389
7105447	Tnni1	0.733548	-1.36324
7039837	Olr336	0.733663	-1.36302
7227688	Galnt5	0.73387	-1.36264
7353257	Ptpn18	0.734038	-1.36233
7104905	Ctse	0.734169	-1.36208
7308057	Sptb	1.3606	1.3606
7120646	Xbp1	0.735455	-1.3597
7206812	Gyg1	0.735598	-1.35944
7270238	Klra2	0.735866	-1.35894
7038227	Cyp2e1	0.736139	-1.35844
7195086	LOC361963	0.736974	-1.3569
7309859	Lgmn	1.35648	1.35648
7364216	Scg2	1.35647	1.35647
7095516	Mapk1	1.35641	1.35641
7063140	Kcnip2	0.737445	-1.35603
7078060	Snap47	1.35602	1.35602
7346776	Rab11a	1.35581	1.35581
7215770	Nexn	1.3558	1.3558
7098313	Ift81	1.35486	1.35486
7049092	Rab4b	0.738298	-1.35447
7285914	Coro2a	0.738354	-1.35436
7162313	Syk	0.738464	-1.35416
7332664	Mmp3	0.739534	-1.3522
7169549	Pcdhb12	1.35215	1.35215
7121841	Xpo1	1.35055	1.35055
7039173	Fibp	1.35029	1.35029
7070041	Nf1	1.34949	1.34949
7209937	Etfdh	1.34909	1.34909
7046264	Dynlt1	0.741591	-1.34845
7199205	Lef1	1.3478	1.3478
7185072	Smpd3	1.34649	1.34649
7089177	Uts2d	0.742865	-1.34614
7083616	Ddx5	1.34565	1.34565
7159028	Mtr	1.3441	1.3441
7379258	Rgn	0.744258	-1.34362
7097400	Plod3	0.744722	-1.34278
7096358	Slc7a1	0.74476	-1.34271
7269053	Erc1	1.34259	1.34259
7247701	Wfdc15a	0.744994	-1.34229
7142931	Erc2	0.745005	-1.34227
7178564	Got2	0.745122	-1.34206
7312214	Gna11	0.745135	-1.34204
7379245	Rbm10	1.34141	1.34141
7220192	Olr1678	0.74553	-1.34133
7093632	Fstl1	0.745717	-1.34099
7204207	Isl1	1.34036	1.34036
7026297	Sdha	1.34	1.34
7342768	Olr1172	0.746339	-1.33987
7274787	Tdrd7	0.746949	-1.33878
7241355	Olr604	0.747029	-1.33864
7203733	Rab3c	1.33801	1.33801
7047561	Prkcg	0.747593	-1.33763
7326239	Kif5a	1.3374	1.3374
7360318	LOC501110	1.33728	1.33728
7273124	Slc7a13	0.747885	-1.3371
7357082	LOC501180	0.748308	-1.33635
7040734	Dmrt1	0.748362	-1.33625
7303147	Prepl	1.33613	1.33613
7217458	Abcg1	1.33564	1.33564
7099302	P2rx2	1.33551	1.33551
7314861	Nap1l1	1.33551	1.33551
7184739	Nr3c2	0.749003	-1.33511
7046399	Slc22a2	0.749044	-1.33503
7200490	Ssx2ip	1.33494	1.33494
7110956	Mapkapk2	0.749227	-1.33471
7170229	Commd10	1.33454	1.33454
7184284	Ucp1	0.749615	-1.33402
7086772	Itsn1	1.33213	1.33213
7246349	Cyss	0.750888	-1.33176
7216868	Egfl8	0.750986	-1.33158
7149878	Isyna1	0.751071	-1.33143
7091007	Atp5j	1.33115	1.33115
7239161	Ermn	0.751338	-1.33096
7339605	Cep70	1.32914	1.32914
7304077	Hadhb	1.32861	1.32861
7322058	Thop1	0.753031	-1.32797
7282572	Kcnb2	0.753188	-1.32769
7251008	C1galt1	1.32756	1.32756
7040068	Gnaq	1.32744	1.32744
7149483	RGD1309676	1.3268	1.3268
7329136	Plec1	1.32624	1.32624
7127587	Inpp5j	0.754135	-1.32602
7149849	Jund	0.754387	-1.32558
7037179	Myst1	0.754414	-1.32553
7220796	Ager	0.754497	-1.32539
7079195	Fgf11	1.3251	1.3251
7269566	Gnb3	0.75506	-1.3244
7155497	Pdlim7	0.755403	-1.3238
7303115	Lrpprc	1.32366	1.32366
7060100	Mark2	1.32352	1.32352
7382393	Slc7a3	0.75668	-1.32156
7273057	Mmp16	0.75668	-1.32156
7235557	Ptpn1	0.756743	-1.32145
7334411	Kcnj1	0.756882	-1.32121
7106132	Ptgs2	0.757796	-1.31962
7259076	Crebl2	0.757947	-1.31935
7345103	Pafah1b2	1.31931	1.31931
7290174	Lrrc41	0.758508	-1.31838
7301151	Chga	1.31812	1.31812
7113142	Dd25	1.31789	1.31789
7334627	Cdon	1.31782	1.31782
7058717	Rnh1	0.758858	-1.31777
7216608	Mrps18b	0.758919	-1.31766
7310053	Serpina3k	0.758987	-1.31755
7218968	Pln	0.759043	-1.31745
7110915	Pfkfb2	1.31713	1.31713
7169439	Slc35a4	0.759233	-1.31712
7042758	Slk	1.31706	1.31706
7301680	Begain	0.759428	-1.31678
7222782	Cdh23	0.759649	-1.3164
7097380	Rabl5	1.31609	1.31609
7123076	Cds1	0.760235	-1.31538
7226995	Kynu	0.760881	-1.31427
7044269	Ltv1	1.31239	1.31239
7081240	Dynll2	1.31161	1.31161
7333533	Qtrt1	0.762552	-1.31139
7078040	Arf1	0.762991	-1.31063
7218776	Sar1a	1.30976	1.30976
7159479	Akr1cl2	0.763769	-1.3093
7069088	Plscr3	0.763853	-1.30915
7359554	Klc4	1.30874	1.30874
7176287	Ppargc1b	1.30856	1.30856
7057320	Ppp4c	0.76466	-1.30777
7258232	Dcir2	0.765109	-1.307
7130724	Pdhb	1.30629	1.30629
7107717	Fcgr3a	0.765757	-1.3059
7173761	Zfp191	0.765828	-1.30578
7321384	Pa2g4	1.30393	1.30393
7074519	Ciita	0.767005	-1.30377
7123445	Anxa3	0.767063	-1.30367
7121328	Cnrip1	0.767665	-1.30265
7035049	Cnga4	0.767824	-1.30238
7351047	Ccbp2	1.30164	1.30164
7321394	Erbb3	0.768411	-1.30139
7235420	Eya2	0.768819	-1.3007
7326769	Azin1	0.768971	-1.30044
7380559	Mageh1	1.30014	1.30014
7148281	RGD1305689	1.30013	1.30013
7130367	Psmd6	1.29982	1.29982
7083521	Gh1	0.76935	-1.2998
7049937	Lsr	0.769374	-1.29976
7355798	Atic	1.29974	1.29974
7354261	Inpp1	0.770456	-1.29793
7333714	Cnn1	0.77051	-1.29784
7212995	Hmox3	0.771123	-1.29681
7204060	Ndufs4	1.29669	1.29669
7160039	Optn	0.771252	-1.29659
7326203	Geft	1.29524	1.29524
7383544	Btk	0.772374	-1.29471
7091025	App	1.2937	1.2937
7375133	Sts	0.773923	-1.29212
7038410	Tmem80	1.29192	1.29192
7072991	Psmd12	1.2913	1.2913
7335072	Olr1326	0.774542	-1.29109
7053289	Hapln3	0.775819	-1.28896
7294823	Epas1	1.2887	1.2887
7234031	Xkr7	0.775976	-1.2887
7106587	Nphs2	0.776395	-1.288
7337900	Dyx1c1	0.776403	-1.28799
7338277	Elovl5	1.28784	1.28784
7042479	RGD1307648	1.28699	1.28699
7347968	Tmem30a	1.2865	1.2865
7359866	Enpp5	1.28618	1.28618
7221506	Dnmt3l	0.777617	-1.28598
7197815	Chia	0.777755	-1.28575
7278272	Nrd1	1.28556	1.28556
7376078	Ogt	1.28411	1.28411
7232590	Ptpra	1.28397	1.28397
7382690	Abcb7	1.28387	1.28387
7350886	Scn5a	0.779077	-1.28357
7088936	Ppp1r2	1.28355	1.28355
7060370	Cd6	0.779193	-1.28338
7217246	Lhfpl5	0.779564	-1.28277
7321065	Prr13	0.779572	-1.28275
7229573	Olr456	0.779832	-1.28233
7150903	Hpgd	0.780225	-1.28168
7059831	Scyl1	0.780368	-1.28145
7374466	Clcn4-2	1.28109	1.28109
7281897	Hes2	0.780618	-1.28104
7209945	Rxfp1	0.780639	-1.281
7100993	RGD1305455	0.78072	-1.28087
7161798	Smad5	1.27968	1.27968
7089754	2010-09-05	0.781524	-1.27955
7344723	Tmem24	0.781799	-1.2791
7269505	Eno2	0.781916	-1.27891
7196511	S100a8	1.27876	1.27876
7308754	Ltbp2	0.782173	-1.27849
7309953	Ddx24	0.782218	-1.27842
7108561	Capn8	0.782348	-1.2782
7196919	Cdc42se1	0.782441	-1.27805
7220622	Bat5	0.782633	-1.27774
7105257	Myog	1.27739	1.27739
7037104	Rnf40	1.2771	1.2771
7084719	Cygb	0.783178	-1.27685
7098824	Hspb8	0.783528	-1.27628
7137537	Tmem55b	0.783542	-1.27626
7073734	Sphk1	0.783596	-1.27617
7105369	Ptpn7	0.783686	-1.27602
7338854	Cyb5r4	0.783863	-1.27573
7166946	Nmt2	1.27544	1.27544
7285948	Gabbr2	0.784168	-1.27524
7216254	Olr1704	0.785689	-1.27277
7059805	Ehbp1l1	1.27263	1.27263
7151389	Casp3	1.27259	1.27259
7148661	Prkcd	0.786484	-1.27148
7171268	St8sia3	1.27095	1.27095
7259030	Bcl2l14	0.78737	-1.27005
7169212	Ctnna1	1.26911	1.26911
7332258	Nfe2	1.26806	1.26806
7275155	Nipsnap3a	1.26763	1.26763
7168253	Dsg4	0.789057	-1.26733
7092373	Gabrr3	0.789986	-1.26585
7098566	Tpcn1	0.790213	-1.26548
7350899	Scn11a	0.790429	-1.26514
7075573	Haghl	1.26461	1.26461
7083011	Slc4a1	0.791165	-1.26396
7281625	Gpr157	0.79142	-1.26355
7029926	Cyp2a1	0.791496	-1.26343
7300127	Ptgr2	1.26271	1.26271
7105275	Cyb5r1	0.791984	-1.26265
7146953	Adam9	1.26254	1.26254
7053295	Mfge8	0.792132	-1.26242
7379784	Sytl5	0.792169	-1.26236
7295757	Pomc	0.792454	-1.2619
7349925	Gnai2	1.26183	1.26183
7071769	Lasp1	1.26137	1.26137
7116933	Cxcl10	0.792895	-1.2612
7027131	Slc22a3	0.793001	-1.26103
7132790	Fbxo16	0.793369	-1.26045
7356958	Sp100	0.793401	-1.2604
7221853	Adora2a	0.793799	-1.25977
7062628	Slit1	0.793857	-1.25967
7099545	Retn	1.25873	1.25873
7311711	Prim1	1.25871	1.25871
7202093	Xrcc4	0.794528	-1.25861
7079771	Pafah1b1	1.25836	1.25836
7326233	Pip4k2c	1.25779	1.25779
7282365	Sdf4	1.25717	1.25717
7216302	Olr1744	1.25715	1.25715
7045772	Syne1	1.25698	1.25698
7216953	Brd2	0.795642	-1.25685
7075566	Msln	0.796619	-1.25531
7199563	Slc39a8	0.796766	-1.25507
7270947	Kcnj8	0.797043	-1.25464
7111833	RGD1564614	0.79748	-1.25395
7258550	Tnfrsf1a	0.797704	-1.2536
7051886	Gabra5	0.797711	-1.25359
7122151	Mtif2	1.25316	1.25316
7068165	Mprip	1.25151	1.25151
7091811	Rcan1	0.799236	-1.25119
7224157	Qrsl1	1.25094	1.25094
7075793	Itfg3	0.799758	-1.25038
7259303	Strap	0.799825	-1.25027
7179771	Rad23a	0.800492	-1.24923
7060124	Rtn3	1.24716	1.24716
7347783	Fbxo9	1.24661	1.24661
7265111	Pde1c	0.802435	-1.24621
7330065	Tob2	0.802986	-1.24535
7111431	Rnpep	0.803059	-1.24524
7318953	Cacna1i	0.803179	-1.24505
7343401	Jam3	1.24501	1.24501
7095530	Ppm1f	1.24496	1.24496
7127790	Nefh	1.24474	1.24474
7217304	RGD735065	1.24428	1.24428
7070623	Car4	1.24357	1.24357
7329479	Apol9a	1.24261	1.24261
7297093	Tmem18	1.24254	1.24254
7379969	Wdr45	1.2423	1.2423
7347994	Impg1	0.805257	-1.24184
7242576	Hipk3	1.24142	1.24142
7127936	Ddx56	0.806103	-1.24054
7041667	Hhex	0.806782	-1.23949
7153875	Myo16	0.806881	-1.23934
7378892	Atp1b4	0.806901	-1.23931
7058050	Ctbp2	1.2391	1.2391
7068475	Trpv2	0.807422	-1.23851
7236631	Pax8	0.80759	-1.23825
7043932	Map3k7ip2	0.808405	-1.237
7034556	P4ha3	0.808663	-1.23661
7280610	Gale	0.808968	-1.23614
7269356	Slc2a3	1.2357	1.2357
7290116	Cyp4a8	0.809273	-1.23568
7241300	Olr545	0.809513	-1.23531
7215277	Clca4	0.809599	-1.23518
7244108	Slc30a4	1.23423	1.23423
7353536	Inpp4a	1.23318	1.23318
7103011	Ankrd13a	0.811123	-1.23286
7156552	Mak	0.811171	-1.23279
7326142	Tspan31	1.23273	1.23273
7251761	Spam1	1.2327	1.2327
7120587	Ap1b1	0.811806	-1.23182
7049245	Psmc4	0.812503	-1.23077
7250417	Abcb4	0.812678	-1.2305
7381109	Ace2	0.812875	-1.2302
7234691	Bpi	0.812933	-1.23011
7286995	Rod1	1.22975	1.22975
7313379	LOC362863	1.22624	1.22624
7367980	Ptprd	1.22574	1.22574
7292975	Plod1	0.815905	-1.22563
7378433	Gabre	0.815917	-1.22562
7216740	Aif1	0.816628	-1.22455
7082845	Becn1	1.22357	1.22357
7355609	Cps1	0.817288	-1.22356
7143103	Tkt	0.817706	-1.22293
7299961	Sipa1l1	0.81803	-1.22245
7357820	Ppp1r7	1.22235	1.22235
7106824	Tnr	1.22148	1.22148
7036197	Acsm2	0.818883	-1.22118
7322460	Hcn2	0.819227	-1.22066
7097593	Gtf2ird1	1.22046	1.22046
7096610	Ocm	1.22042	1.22042
7320712	Gpd1	0.819774	-1.21985
7354973	Nol5	1.21936	1.21936
7215239	Sh3glb1	1.21827	1.21827
7076246	Odz2	1.21809	1.21809
7373718	Magix	0.821405	-1.21743
7042287	Cyp2c23	0.821794	-1.21685
7161271	Olr1653	0.821919	-1.21666
7081342	Akap1	1.21654	1.21654
7233587	Cst8	0.822564	-1.21571
7324052	Socs2	1.21562	1.21562
7131335	Rnase4	0.822901	-1.21521
7168932	Bin1	0.822998	-1.21507
7223922	Smpd2	0.823703	-1.21403
7318225	Grina	0.823814	-1.21387
7251936	Snd1	0.82474	-1.2125
7243436	Rasgrp1	0.824985	-1.21214
7340147	Cacna2d2	0.825284	-1.2117
7070122	Cpd	1.21102	1.21102
7263525	Akr1b1	0.825812	-1.21093
7307276	Mdga2	0.82626	-1.21027
7285739	Gne	0.826689	-1.20964
7296563	Odc1	0.827002	-1.20919
7231641	Tyro3	0.827154	-1.20896
7171690	RGD1359600	1.20726	1.20726
7290413	St3gal3	0.828561	-1.20691
7188450	Dmgdh	0.828681	-1.20674
7111814	Cfh	0.82891	-1.2064
7322080	Oaz1	0.828978	-1.20631
7069885	Flot2	1.20629	1.20629
7266058	Elmod3	0.829026	-1.20624
7060374	Tmem132a	0.829243	-1.20592
7343376	Glb1l3	0.829499	-1.20555
7234595	Manbal	0.830176	-1.20456
7302218	Adam6	0.830753	-1.20373
7322033	Eef2	0.83144	-1.20273
7058761	Mucdhl	0.831468	-1.20269
7179052	Es22	0.831472	-1.20269
7328765	Eif2c2	1.20173	1.20173
7225380	Pmpca	1.20087	1.20087
7059057	Nap1l4	1.20037	1.20037
7210296	Arfip1	1.2002	1.2002
7249894	LOC499980	0.834185	-1.19878
7222244	Ank3	0.834492	-1.19833
7083542	Icam2	0.834725	-1.198
7183171	Slc6a2	1.1978	1.1978
7030456	Nphs1	0.835317	-1.19715
7150153	Lpl	1.19704	1.19704
7043637	Pnliprp1	0.835438	-1.19698
7059009	Th	0.83552	-1.19686
7331406	Rpap3	1.19645	1.19645
7237514	Dyt1	1.19606	1.19606
7098934	Hnf1a	0.837442	-1.19411
7050858	Rcn3	0.837455	-1.19409
7180346	Tmem184c	1.19378	1.19378
7353831	Il1rl2	0.837964	-1.19337
7380834	Mid1	0.838056	-1.19324
7237475	Crat	0.838213	-1.19301
7323057	Fbxo7	0.838251	-1.19296
7039002	Ppp1ca	0.838304	-1.19288
7357387	Spp2	0.838488	-1.19262
7284103	Necab1	0.838555	-1.19253
7381338	Sh3kbp1	0.83863	-1.19242
7376059	Gjb1	1.19217	1.19217
7046605	Pde10a	0.839189	-1.19163
7161672	Ntrk2	0.839986	-1.1905
7354140	Col3a1	0.840229	-1.19015
7125450	Uchl1	0.840526	-1.18973
7339838	Ryk	1.18811	1.18811
7097612	Gtf2i	1.18797	1.18797
7071898	Psmd3	0.841972	-1.18769
7115720	Cd46	1.1874	1.1874
7085814	Robo1	1.18719	1.18719
7071980	Rara	0.842456	-1.18701
7067200	Mapk9	1.18674	1.18674
7241852	Cry2	0.843501	-1.18554
7039741	Prpf19	1.18524	1.18524
7305756	Tspan13	1.1852	1.1852
7329802	Csnk1e	0.843959	-1.18489
7027116	Igf2r	1.18406	1.18406
7138556	Cryl1	0.84459	-1.18401
7377933	LOC302845	0.844893	-1.18358
7093799	Kpna1	1.18342	1.18342
7253525	Doxl2	0.845092	-1.1833
7099740	Brca2	1.1832	1.1832
7178411	Cdh8	0.845411	-1.18286
7138131	Myh7	0.845442	-1.18281
7330872	Slc2a13	0.845783	-1.18234
7380003	Cacna1f	0.846203	-1.18175
7221034	Daxx	1.18015	1.18015
7175969	2010-03-03	0.847546	-1.17988
7197285	Hmgcs2	0.847971	-1.17929
7244553	Kcnip3	1.17795	1.17795
7033513	Slc28a1	0.849668	-1.17693
7144378	Gatad2a	0.849839	-1.17669
7247648	Serinc3	1.17519	1.17519
7057365	Taok2	1.17495	1.17495
7063991	Gucy2g	0.85119	-1.17483
7209003	Igsf10	0.851558	-1.17432
7357599	Lrrfip1	1.17407	1.17407
7242375	Trim44	1.17337	1.17337
7328457	Kcnq3	1.17331	1.17331
7232079	Slc12a1	0.852359	-1.17321
7038898	Chka	0.852496	-1.17303
7350181	Ptpn23	0.852619	-1.17286
7127569	Limk2	1.17269	1.17269
7331331	Slc38a2	0.853079	-1.17222
7160184	Olah	1.17095	1.17095
7231802	LOC311352	0.854385	-1.17043
7082594	Krt1-5	1.17037	1.17037
7308187	Atp6v1d	1.16955	1.16955
7047787	Epn1	0.855372	-1.16908
7143155	Tmem110	1.168	1.168
7060258	Fads2	1.16767	1.16767
7115090	Mark1	1.16737	1.16737
7340634	Map4	1.16676	1.16676
7350155	Dhx30	1.16643	1.16643
7247856	Cdh22	0.857521	-1.16615
7308330	Actn1	1.16605	1.16605
7285532	RGD1311249	0.857735	-1.16586
7069188	Asgr1	0.857835	-1.16573
7143272	Btd	0.858071	-1.1654
7058599	Echs1	1.1653	1.1653
7254521	Serbp1	1.16461	1.16461
7279949	Col16a1	0.85914	-1.16395
7045399	Ccdc127	1.16339	1.16339
7029617	RGD1309888	0.860577	-1.16201
7290394	Dph2	1.16165	1.16165
7065811	Jmjd8	1.16089	1.16089
7241831	Mapk8ip1	0.862977	-1.15878
7155617	Sncb	1.1581	1.1581
7084449	Slc25a19	0.86398	-1.15743
7290429	Ptprf	1.15575	1.15575
7169300	Cxxc5	1.15515	1.15515
7264544	Rarres2	0.866096	-1.15461
7383301	Nap1l3	0.866436	-1.15415
7097527	Pom121	0.866484	-1.15409
7100179	Znf655	1.15142	1.15142
7341512	Ctnnb1	0.869397	-1.15022
7084754	Sfrs2	0.870259	-1.14908
7169367	Slc4a9	0.871826	-1.14702
7282767	Sulf1	0.871873	-1.14696
7211368	Psmb4	0.8723	-1.1464
7220764	Atf6b	0.87574	-1.14189
7363541	Fn1	0.875831	-1.14177
7315422	Grip1	0.876078	-1.14145
7280452	Rhd	0.87638	-1.14106
7037213	Itgam	0.876387	-1.14105
7250063	RGD1565355	0.876504	-1.1409
7228160	Scn2a1	1.1374	1.1374
7336711	Ubl7	0.87984	-1.13657
7036726	Il4ra	1.13625	1.13625
7119891	Nsg1	1.13463	1.13463
7321914	Aes	0.881755	-1.1341
7078672	Myocd	0.882373	-1.13331
7078953	Gucy2e	0.882443	-1.13322
7247754	Sdc4	1.13299	1.13299
7049155	Pld3	0.884973	-1.12998
7233853	Nsfl1c	0.884973	-1.12998
7365728	Slco6c1	0.885047	-1.12988
7336729	Cyp11a1	0.886179	-1.12844
7225252	Npdc1	0.886456	-1.12809
7216651	Ddr1	1.12761	1.12761
7236770	Grin1	0.886957	-1.12745
7133219	Gfra2	0.887107	-1.12726
7065802	Fbxl16	0.888469	-1.12553
7218656	Psap	1.12371	1.12371
7363933	Ptprn	0.890548	-1.1229
7268883	Ret	0.892423	-1.12054
7071340	Lrrc59	0.893322	-1.11942
7124827	Kit	0.894321	-1.11817
7043426	Habp2	0.894942	-1.11739
7222806	Unc5b	0.895722	-1.11642
7057437	Kif22	1.11615	1.11615
7312496	Rexo1	0.89601	-1.11606
7379235	Uba1	0.899774	-1.11139
7249028	Rgs19	0.90093	-1.10996
7073691	Itgb4	0.901656	-1.10907
7335948	Drd2	0.901964	-1.10869
7142858	Arf4	0.902178	-1.10843
7177129	Smad4	1.10627	1.10627
7038518	Ap2a2	0.904219	-1.10593
7385140	Atp6ap1	1.10462	1.10462
7059851	Frmd8	0.906824	-1.10275
7035439	Ampd3	1.10128	1.10128
7048321	Gltscr2	1.09661	1.09661
7184073	Cacna1a	0.912558	-1.09582
7101298	Por	0.915447	-1.09236
7071880	Zpbp2	0.916397	-1.09123
7097489	Ywhag	0.916632	-1.09095
7031538	Bcat2	0.916799	-1.09075
7197016	Aph1a	0.917998	-1.08933
7214067	Egf	0.922134	-1.08444
7166920	Dclre1c	0.922932	-1.0835
7302329	Ptprn2	1.08349	1.08349
7194074	Trpc4	1.07608	1.07608
7316618	Trhr	0.931082	-1.07402
7336978	Tle3	0.93437	-1.07024
7237624	Dnm1	0.944578	-1.05867
7093534	B4galt4	0.947284	-1.05565
7068974	Aurkb	1.04702	1.04702

## Sheet: Supplementary Figure 9
Supplementary Figure 9
Transcript ID	Gene Symbol	Ratio(3-h vs control)	Fold-Change(3-h vs control)
7214260	Sgms2	16.0541	16.0541
7314286	Dusp6	14.4089	14.4089
7101220	Serpine1	10.9709	10.9709
7120521	Lif	10.442	10.442
7139530	Nefm	9.98242	9.98242
7332679	Mmp10	9.64959	9.64959
7332664	Mmp3	7.5981	7.5981
7028765	V1rm5	0.142446	-7.02021
7283909	Ppm2c	6.69308	6.69308
7262941	Gpr37	6.25407	6.25407
7112009	Rgs2	5.76751	5.76751
7189518	Plk2	5.75857	5.75857
7322501	Giot1	5.55698	5.55698
7060553	Olr322	0.19972	-5.00701
7314872	Phlda1	4.98587	4.98587
7305953	Arl4a	4.69868	4.69868
7159775	Gata3	4.66823	4.66823
7039170	Fosl1	4.35849	4.35849
7199205	Lef1	4.35084	4.35084
7281719	Errfi1	4.2694	4.2694
7312161		4.22568	4.22568
7152929	Plat	4.09978	4.09978
7067711	Slc36a1	0.252928	-3.95369
7309626	Eml5	3.76979	3.76979
7068475	Trpv2	3.75045	3.75045
7071134	Mmd	3.73123	3.73123
7048738	PVR	3.68131	3.68131
7332064	Krt8	3.63881	3.63881
7293085	Rpl14	3.63305	3.63305
7071036	Trim25	3.61171	3.61171
7288744	Jun	0.278106	-3.59575
7350504	Ccr4	3.58293	3.58293
7065178	Fam100a	0.288071	-3.47137
7174411	Hspa9	3.42102	3.42102
7160453	Arl5b	3.40009	3.40009
7191656	Zfp455	3.36413	3.36413
7152119	Dusp4	3.35637	3.35637
7336623	Rpp25	0.301511	-3.31663
7111272	Btg2	0.304447	-3.28464
7354355	Obfc2a	3.27861	3.27861
7363158	Cryge	0.305323	-3.27522
7028549	Il11	3.2476	3.2476
7058611	Olr286	0.310186	-3.22387
7134502	Klf5	3.2076	3.2076
7343909	St3gal4	3.20216	3.20216
7334627	Cdon	0.31344	-3.1904
7326769	Azin1	3.19023	3.19023
7179628	Dnaja2	3.15439	3.15439
7194202	Dclk1	3.11032	3.11032
7296563	Odc1	3.10862	3.10862
7212700	Gnai3	3.07051	3.07051
7326677	Ncald	0.325687	-3.07043
7187674	Glrx1	3.05615	3.05615
7059866	Pola2	0.329375	-3.03605
7323387	Tra1	2.98002	2.98002
7082251	Fbxl20	0.336096	-2.97534
7229764	Olr653	0.336654	-2.97041
7368000	Sema6b	0.337429	-2.96358
7064324	RGD1308127	2.94793	2.94793
7288291	Adfp	2.92127	2.92127
7148827	Mettl6	2.91966	2.91966
7325438	Rap1b	2.91771	2.91771
7055204	Olr56	2.91715	2.91715
7068318	Kcnj12	0.342927	-2.91607
7331581	Rnd1	2.90207	2.90207
7321119	Tbca	2.89301	2.89301
7282521	Rdh10	2.8683	2.8683
7059293	Ccnd1	0.351391	-2.84583
7174531	Nrg2	0.351792	-2.84259
7132982	Nefl	2.83618	2.83618
7061354	Fam122a	2.82715	2.82715
7274003	Cga	2.80558	2.80558
7364446	Irs1	2.80045	2.80045
7149521	Klf2	0.361612	-2.76539
7194141	Smad9	0.362242	-2.76059
7331170	Twf1	2.75624	2.75624
7210709	Syt11	0.366268	-2.73024
7329864	Cbx6	0.366925	-2.72535
7197113	Txnip	0.367916	-2.71801
7209445	Lxn	2.71416	2.71416
7232517	Sirpa	0.368496	-2.71373
7222466	Egr2	0.371027	-2.69522
7200444	Bcl10	2.66846	2.66846
7192885	Mfn1	2.66599	2.66599
7210088	Gucy1a3	0.375342	-2.66423
7105438	Phlda3	0.375864	-2.66054
7125079	Slc10a4	0.37678	-2.65407
7055334	Olr144	0.378937	-2.63896
7067118	Mgat1	2.63805	2.63805
7338854	Cyb5r4	2.62974	2.62974
7199838	Eif4e	2.629	2.629
7334965	Olr1246	0.383773	-2.60571
7136011	Samd8	2.60393	2.60393
7207664	Anxa5	2.60153	2.60153
7338247	Gclc	2.59836	2.59836
7380731	Gpr173	0.38825	-2.57566
7101298	Por	2.57067	2.57067
7221921	Gnaz	0.390498	-2.56083
7082775	Stat3	2.55972	2.55972
7097412	Vgf	2.55227	2.55227
7144218	Gdf15	0.391859	-2.55194
7062917	Scd1	2.54006	2.54006
7275140	Olr853	0.396119	-2.52449
7087722	Alcam	2.51996	2.51996
7137113	Ero1l	2.51074	2.51074
7216240	Olr1687	0.399102	-2.50563
7151297	Dctd	0.399306	-2.50434
7266497	Hk2	2.5003	2.5003
7198627	Arhgap29	2.49972	2.49972
7025269	Cited2	2.49286	2.49286
7327842	Fbxo32	2.49269	2.49269
7060667	Olr377	0.401601	-2.49003
7374114	Acsl4	2.47047	2.47047
7218847	Kpna5	2.4642	2.4642
7027955	V1re24	2.45886	2.45886
7218776	Sar1a	2.45622	2.45622
7206781	Crh	2.4548	2.4548
7170182	Eif1a	2.45283	2.45283
7098424	Sh2b3	2.45105	2.45105
7185072	Smpd3	0.409034	-2.44478
7250653	Cyp51	2.43677	2.43677
7342746	Olr1158	0.411507	-2.43009
7062159	Ppp1r3c	0.412293	-2.42546
7158671	Crem	2.41591	2.41591
7279020	Slc2a1	2.41185	2.41185
7249899	Ptpn12	2.39153	2.39153
7296103	Sdc1	2.39053	2.39053
7154650	Ctsl1	2.39031	2.39031
7186299	Rnf166	0.423058	-2.36374
7243648	Ehd4	2.36321	2.36321
7363784	Fev	0.425979	-2.34753
7071308	Tob1	0.426791	-2.34307
7219301	Tspyl4	0.427374	-2.33987
7084719	Cygb	0.428821	-2.33198
7197150	Pias3	0.431316	-2.31849
7326630	Ywhaz	2.31709	2.31709
7049312	Zfp36	0.432679	-2.31118
7055526	Olr213	0.432829	-2.31038
7075088	Tnfrsf12a	2.30308	2.30308
7286823	Lpar1	2.30229	2.30229
7269646	Tuba3a	0.434383	-2.30212
7341027	Cmtm6	2.28886	2.28886
7083103	Dcakd	0.438438	-2.28082
7370448	Uhrf1	0.439557	-2.27502
7225677	Ralgds	0.440559	-2.26984
7349142	Zbtb38	2.2675	2.2675
7294897	Tacstd1	2.26687	2.26687
7112993	Cacybp	2.26577	2.26577
7137256	Gch1	2.26325	2.26325
7040139	RGD1311350	2.25803	2.25803
7333634	Ldlr	2.25508	2.25508
7158830		2.24971	2.24971
7065802	Fbxl16	0.445474	-2.2448
7178969	Hmox1	2.24311	2.24311
7312279	LOC100125365	0.447439	-2.23494
7275590	Ugcg	2.23255	2.23255
7312677	Olr1086	0.448062	-2.23183
7133039	Stc1	2.22874	2.22874
7257708	Olr829	0.449692	-2.22374
7039697	Cybasc3	0.450688	-2.21883
7084899	Cant1	0.45072	-2.21867
7250350	Dmtf1	2.21784	2.21784
7166400	Gdi2	2.21675	2.21675
7178179	Rrad	2.21499	2.21499
7139682	Rhobtb2	0.451665	-2.21403
7323355	Txnrd1	2.21396	2.21396
7239774	Scn7a	2.21022	2.21022
7079725	Olr1492	0.45268	-2.20907
7319165	Tef	0.45285	-2.20824
7110956	Mapkapk2	2.20638	2.20638
7257154	Arl8b	2.20411	2.20411
7029996	MGC108974	0.453731	-2.20395
7149805	Rab3a	0.454171	-2.20182
7276628	Snapc3	2.19901	2.19901
7354636	Coq10b	2.19898	2.19898
7341147	Abhd5	2.19484	2.19484
7046360	Tcp1	2.19337	2.19337
7098535	Rph3a	0.457015	-2.18811
7080069	Tlcd1	0.458052	-2.18316
7312263	Nfic	0.458434	-2.18134
7229664	Olr563	2.17766	2.17766
7109814	Bcl2	0.459887	-2.17445
7348411	Snap91	2.17356	2.17356
7252206	Mkln1	2.16829	2.16829
7301854	Dync1h1	2.16514	2.16514
7190677	Amacr	0.462469	-2.16231
7120384	Pik3ip1	0.465109	-2.15003
7318456	Commd5	0.466441	-2.1439
7057923	RGD1305014	2.14339	2.14339
7122193	Sptbn1	2.14059	2.14059
7337271	Parp16	0.468768	-2.13325
7249637	Kcnh2	0.468918	-2.13257
7285914	Coro2a	0.471458	-2.12108
7169450	Ik	2.12085	2.12085
7356519	Kcne4	0.472573	-2.11607
7241493	Olr715	0.473011	-2.11412
7374343	Smc1a	2.10839	2.10839
7025275		2.10781	2.10781
7226619	Olr403	0.4754	-2.10349
7358936	Yes1	2.10241	2.10241
7337587	Anxa2	2.09887	2.09887
7039277	Ehd1	0.477327	-2.095
7208870	Pfn2	2.09117	2.09117
7199594	Ppp3ca	2.09105	2.09105
7087347	Olr1545	0.479459	-2.08568
7220226	Olr1700	2.07995	2.07995
7206103	Car2	2.07715	2.07715
7342728	Olr1138	0.481553	-2.07662
7272445	Sdcbp	2.07271	2.07271
7055421	Apbb1	0.482664	-2.07183
7054711	Capn5	0.484711	-2.06308
7197828	Tmem77	2.06297	2.06297
7258494	Vamp1	2.06277	2.06277
7084614	Acox1	2.05716	2.05716
7226594	Olr395	0.48647	-2.05563
7314682	Ppp1r12a	2.05212	2.05212
7095183	Klhl24	0.487552	-2.05106
7269203	Bid	2.04695	2.04695
7314252	Atp2b1	2.04271	2.04271
7337380	Csnk1g1	2.04222	2.04222
7383569	Armcx6	0.490049	-2.04061
7070793	Ptrh2	0.490899	-2.03708
7055344	Ubqlnl	0.492737	-2.02948
7063113	Mgea5	2.02945	2.02945
7287531	Dbc1	2.02932	2.02932
7300308	Jdp2	0.493381	-2.02683
7204170	Itga1	2.02569	2.02569
7082318	Nr1d1	0.493982	-2.02437
7357034	Psmd1	2.02373	2.02373
7271135	Kras	2.01896	2.01896
7248426	Aurka	0.495891	-2.01657
7285739	Gne	0.496293	-2.01494
7148661	Prkcd	2.01358	2.01358
7257710	Olr830	0.49688	-2.01256
7144691	Sc4mol	2.00856	2.00856
7098920	Acads	0.498497	-2.00603
7304448	Rhob	0.499671	-2.00132
7179800	Ier2	0.499683	-2.00127
7354973	Nol5	2.00028	2.00028
7060259	Fen1	0.500515	-1.99794
7204207	Isl1	1.99759	1.99759
7081797	Pdk2	0.500848	-1.99661
7290429	Ptprf	1.99403	1.99403
7327773	RGD1310852	0.502569	-1.98977
7143155	Tmem110	0.503338	-1.98674
7258550	Tnfrsf1a	1.9867	1.9867
7114555	Hnrnpu	1.98444	1.98444
7118521	Ugdh	1.98173	1.98173
7216519	RT1-N3	1.97513	1.97513
7097556	Limk1	0.50741	-1.97079
7235211	Svs3	0.508074	-1.96822
7244305	Cops2	1.96793	1.96793
7039087	Slc29a2	0.508732	-1.96567
7335234	Vof16	1.96545	1.96545
7154722	Ptch1	0.509053	-1.96443
7209796	Pdcd10	1.96203	1.96203
7151923	Tusc3	1.9597	1.9597
7173081	Usp14	1.95532	1.95532
7296515	Rock2	1.95532	1.95532
7354298	Nab1	1.94844	1.94844
7270226	Ly49s7	0.513384	-1.94786
7048412	Mif	0.513913	-1.94585
7216317	Olr1750	0.514322	-1.94431
7375057	Sat1	1.9441	1.9441
7346991	Tpm1	1.9363	1.9363
7198992	Tifa	0.517063	-1.934
7050691	Pold1	0.517743	-1.93146
7293359	Slc45a1	0.518185	-1.92981
7290281	Hpdl	0.518205	-1.92974
7296550	Nol10	1.92863	1.92863
7241275	Olr527	0.518732	-1.92778
7378253	Fmr1	1.92502	1.92502
7331641	Lmbr1l	0.519683	-1.92425
7284912	Znf292	1.92185	1.92185
7154665	Zfp367	0.520402	-1.92159
7293717	Prkcz	0.520571	-1.92097
7320698	Accn2	0.520668	-1.92061
7279509	Stk40	1.92058	1.92058
7055631	Olr257	0.521127	-1.91892
7037921	Glrx3	1.91694	1.91694
7186897	Itgb1	1.91568	1.91568
7344336	Olr1291	0.522731	-1.91303
7131725	Mmp14	1.91279	1.91279
7247754	Sdc4	1.91105	1.91105
7138197	Jph4	0.523389	-1.91063
7138405	Gzmf	0.523474	-1.91032
7069295	Rabep1	1.91028	1.91028
7342735	Olr1144	0.523997	-1.90841
7317317	Sqle	1.90325	1.90325
7348389	Me1	1.90318	1.90318
7293647	Actrt2	0.525449	-1.90313
7269913	MGC94282	0.525825	-1.90177
7144059	Gtpbp3	0.527145	-1.89701
7327087	Eif3e	1.89631	1.89631
7289706	LOC366431	0.528509	-1.89212
7034743	Phox2a	0.52909	-1.89004
7234287	Itch	1.8899	1.8899
7306743	Garnl1	1.88858	1.88858
7039741	Prpf19	0.530236	-1.88595
7336387	Psma4	1.88589	1.88589
7067495	Skp1	1.88475	1.88475
7340323	Ihpk1	0.530972	-1.88334
7313913	Ccdc41	1.87995	1.87995
7131085	Lgals3	1.87852	1.87852
7144206	Pgpep1	0.532368	-1.8784
7123757	Uso1	1.87714	1.87714
7152208	Ppp2cb	1.8765	1.8765
7104666	R3hdm1	1.87522	1.87522
7048757	Zfp111	1.87377	1.87377
7191852	Snx16	1.87342	1.87342
7342629	Olr1117	0.53392	-1.87294
7087373	Olr1560	0.534451	-1.87108
7346776	Rab11a	1.87077	1.87077
7162107	Unc5a	0.534588	-1.8706
7132871	Trim35	0.53475	-1.87003
7233989	Id1	0.535107	-1.86878
7137638	Zfp219	0.535395	-1.86778
7359745	Nfkbie	0.535747	-1.86655
7309166	Porf1	1.86544	1.86544
7174110	Syt4	1.86124	1.86124
7108028	Olr1593	0.537453	-1.86063
7063981	Gpam	0.537474	-1.86055
7381555	Prkx	1.86001	1.86001
7056128	Btbd10	1.8587	1.8587
7042688	Cnnm2	0.53817	-1.85815
7069228	Arrb2	0.538978	-1.85536
7329513	Myh9	1.85488	1.85488
7079308	Slc16a13	0.541334	-1.84729
7350927	Cx3cr1	0.541372	-1.84716
7079195	Fgf11	0.541858	-1.8455
7100179	Znf655	1.8433	1.8433
7326616	Pabpc1	1.84212	1.84212
7309604	Ptpn21	1.84135	1.84135
7299556	Fut8	0.543196	-1.84096
7346735	Map2k1	1.83944	1.83944
7114455	Kab	1.83786	1.83786
7221545	Pttg1ip	1.83712	1.83712
7149580	Tpm4	1.83655	1.83655
7331539	Adcy6	0.544758	-1.83568
7259835	Tuba3b	0.545461	-1.83331
7164592	LOC498750	1.83057	1.83057
7051105	Emp3	1.83055	1.83055
7151794	Slc7a2	0.547649	-1.82599
7380334	Alg13	1.82583	1.82583
7173094	Rock1	1.82455	1.82455
7072991	Psmd12	1.82293	1.82293
7237701	Slc2a8	0.548833	-1.82205
7079952	Unc119	0.548905	-1.82181
7031293	Syt3	0.549013	-1.82145
7300895	Zc3h14	1.82128	1.82128
7067435	Sar1b	1.82065	1.82065
7329878	Cbx7	0.549339	-1.82037
7140146	Cog3	1.81873	1.81873
7147187	Polb	1.81819	1.81819
7048865	Atp1a3	0.550417	-1.81681
7130367	Psmd6	1.81558	1.81558
7036358	Uqcrc2	1.8138	1.8138
7381477	Acot9	1.81112	1.81112
7121799	Zrsr1	1.81028	1.81028
7031596	Dbp	0.552615	-1.80958
7332636	Dcun1d5	1.80573	1.80573
7318430	Lrrc14	0.554506	-1.80341
7383689	Morf4l2	1.803	1.803
7179948	Cd97	1.80031	1.80031
7232331	Dusp2	1.80014	1.80014
7212517	Atp5f1	1.79966	1.79966
7218117	Phyhipl	1.79944	1.79944
7308187	Atp6v1d	1.79904	1.79904
7232815	Chgb	1.79483	1.79483
7223824	Slc16a10	0.558038	-1.79199
7198646	Gclm	1.79188	1.79188
7039833	Olr329	1.79051	1.79051
7347831	Slc17a5	0.558913	-1.78919
7199523	Ube2d3	1.78846	1.78846
7377732	Hprt1	1.78294	1.78294
7202569	F2r	0.561024	-1.78246
7059602	Rbm4b	1.78204	1.78204
7081124	Cltc	1.78136	1.78136
7303330	Fbxo11	1.78125	1.78125
7094386	Hes1	0.562155	-1.77887
7253211	Olr819	0.562438	-1.77797
7318705	H1f0	0.562853	-1.77666
7343093	Ecsit	0.563068	-1.77598
7306585	Egln3	1.77577	1.77577
7225321	Bmyc	0.563423	-1.77487
7036598	Lcmt1	1.77349	1.77349
7308065	Gpx2	0.564178	-1.77249
7071805	Crkrs	1.77214	1.77214
7081754	Xylt2	0.564304	-1.7721
7082646	Hap1	0.564623	-1.77109
7341767	Sacm1l	1.77072	1.77072
7337714	RGD1307526	1.77	1.77
7094920	Senp2	1.76909	1.76909
7299626	Eif2s1	1.76889	1.76889
7289221	Jak1	1.76658	1.76658
7330115	Nhp2l1	0.566332	-1.76575
7234045	Pofut1	0.566709	-1.76457
7280406	Pafah2	0.56692	-1.76392
7070080	Taok1	1.7628	1.7628
7217521	Pknox1	1.76119	1.76119
7216859	Ppt2	0.56851	-1.75898
7087119	Wrb	0.568565	-1.75881
7384026	Apln	0.568725	-1.75832
7059051	Cdkn1c	0.568998	-1.75747
7269066	Wnk1	1.75647	1.75647
7118679	LOC498368	0.569393	-1.75626
7033968	Picalm	1.74988	1.74988
7056205	Rras2	1.74944	1.74944
7282063	RGD1304567	0.572146	-1.7478
7263525	Akr1b1	1.74613	1.74613
7043235	Smc3	1.74428	1.74428
7159665	Pfkfb3	1.74377	1.74377
7312214	Gna11	0.574032	-1.74206
7115090	Mark1	1.74065	1.74065
7169702	Ndfip1	1.74034	1.74034
7297253	Sypl1	1.73999	1.73999
7220540	Clic1	1.73896	1.73896
7028258	V1re10	0.575322	-1.73816
7250032	Gnai1	1.73637	1.73637
7342417	RGD1309534	0.576453	-1.73475
7317471	Myc	1.73243	1.73243
7236497	Polr3k	0.577978	-1.73017
7137124	Fermt2	1.72961	1.72961
7318897	Syngr1	0.578662	-1.72812
7096263	Hsph1	1.72767	1.72767
7217541	Pdxk	0.579361	-1.72604
7171533	Impa2	0.579888	-1.72447
7316024	Mtdh	1.72409	1.72409
7147197	Vdac3	1.7232	1.7232
7268462	Tmem111	1.72126	1.72126
7372849	Lamp2	1.72116	1.72116
7170785	Slc12a2	1.72011	1.72011
7221460	Snf1lk	1.71958	1.71958
7250393	Abcb1	1.717	1.717
7081853	Ngfr	0.582421	-1.71697
7257404	Il17re	0.583015	-1.71522
7077026	Canx	1.71509	1.71509
7318588	Mpst	0.583081	-1.71503
7029638	Xrcc1	0.583342	-1.71426
7344605	Arhgef12	1.71314	1.71314
7329479	Apol9a	1.71021	1.71021
7031665	Myod1	1.70991	1.70991
7205095	Tars	1.70966	1.70966
7244509	Itpripl1	0.585055	-1.70924
7380993	Trappc2	1.70745	1.70745
7290767	Cap1	1.70689	1.70689
7223998	RGD1311358	0.585907	-1.70675
7140047	Itm2b	1.70561	1.70561
7069088	Plscr3	0.586371	-1.7054
7209566	Kpna4	1.70445	1.70445
7246993	Edem2	0.586727	-1.70437
7177448	Ccdc5	0.587046	-1.70344
7137230	Gmfb	1.7032	1.7032
7176768	Ptpn2	1.7028	1.7028
7091588	Synj1	1.70268	1.70268
7285235	Smu1	1.70076	1.70076
7215467	Prkacb	0.588712	-1.69862
7322448	Palm	0.588972	-1.69787
7249610	Fastk	0.589208	-1.69719
7318097	RGD1359378	0.589524	-1.69628
7278272	Nrd1	1.69626	1.69626
7059908	Tm7sf2	0.589783	-1.69554
7220954	H2-Oa	0.590107	-1.69461
7199710	Map2k1ip1	1.69203	1.69203
7082163	Pip4k2b	0.591629	-1.69025
7079944	Eral1	0.591717	-1.69
7161974	Ddx46	1.68922	1.68922
7264786	Hoxa1	0.59221	-1.68859
7053895	Arnt2	0.592456	-1.68789
7127825	Kremen1	0.592538	-1.68766
7178572	Slc38a7	0.592835	-1.68681
7260744	Psmc2	1.68671	1.68671
7220449	Ppp1r10	0.593207	-1.68575
7137537	Tmem55b	0.595118	-1.68034
7067702	Gm2a	0.595121	-1.68033
7064901	Carhsp1	0.595283	-1.67987
7280942	Pla2g2c	0.595477	-1.67933
7155441	Pitx1	0.595673	-1.67877
7197996	Psma5	1.67691	1.67691
7208907	Serp1	1.67643	1.67643
7038395	Phrf1	1.67399	1.67399
7255936	Gata2	0.598758	-1.67012
7263775	Creb3l2	1.66956	1.66956
7363933	Ptprn	1.66698	1.66698
7149849	Jund	0.600412	-1.66552
7108351	Sccpdh	1.66313	1.66313
7339182	Plod2	1.66052	1.66052
7336395	Chrna5	0.602572	-1.65955
7220192	Olr1678	0.603091	-1.65812
7268883	Ret	1.65691	1.65691
7046023	Tfb1m	0.604143	-1.65524
7294686	Ppm1b	1.65498	1.65498
7047547	Cacng6	0.604281	-1.65486
7338277	Elovl5	1.65369	1.65369
7246349	Cyss	0.605008	-1.65287
7304743	Ddx1	1.65213	1.65213
7228630	Dync1i2	1.65067	1.65067
7119953	Wfs1	0.606063	-1.64999
7035022	Olr189	0.606799	-1.64799
7110360	Ralb	1.6474	1.6474
7039476	Nxf1	1.64706	1.64706
7254783	Vps24	1.64687	1.64687
7239391	Rbms1	1.64604	1.64604
7217249	Mapk14	0.607795	-1.64529
7103033	Ung	0.608084	-1.64451
7143988	Myo9b	1.64325	1.64325
7127587	Inpp5j	0.608616	-1.64307
7338040	Myo5a	1.64142	1.64142
7130447	Cadps	1.63891	1.63891
7295578	Ucn	0.610432	-1.63819
7218723	Pcbd1	1.63794	1.63794
7185182	Nqo1	1.6371	1.6371
7162605	Omd	0.611121	-1.63634
7326142	Tspan31	1.63625	1.63625
7345937	Etfa	1.63622	1.63622
7316042	Laptm4b	1.63608	1.63608
7076436	MGC94725	1.63591	1.63591
7345821	Cul5	1.63327	1.63327
7065661	Clcn7	0.612803	-1.63184
7074039	Slc25a10	0.612962	-1.63142
7291142	Gja4	1.63138	1.63138
7236148	Ss18l1	0.613153	-1.63091
7347626	Tmod2	0.613467	-1.63008
7354086	Tpp2	1.62864	1.62864
7111091	Nfasc	0.614605	-1.62706
7156155	Dek	1.62603	1.62603
7175050	Lars	1.62448	1.62448
7183857	Olr1666	0.615642	-1.62432
7094141	Tnk2	0.615669	-1.62425
7222804	Slc29a3	0.6176	-1.61917
7347608	Tmod3	1.61853	1.61853
7182338	Cklf	0.618225	-1.61753
7048952	Lipe	0.618484	-1.61686
7197958	Gstm5	1.61546	1.61546
7226634	Olr410	1.61532	1.61532
7217282	Cdkn1a	1.61362	1.61362
7046271	Ezr	1.6126	1.6126
7031338	Kcnc3	0.620139	-1.61254
7082845	Becn1	1.61236	1.61236
7100963	Mcm7	0.620299	-1.61213
7238091	Strbp	1.60996	1.60996
7212548	Cept1	1.60813	1.60813
7349569	Uba5	1.60749	1.60749
7278898	Slc6a9	0.622193	-1.60722
7114652	Cabc1	0.622852	-1.60552
7233862	Fkbp1a	1.60388	1.60388
7320920	Nr4a1	0.623747	-1.60321
7375727	Msn	1.60101	1.60101
7329380	MGC94207	0.624866	-1.60034
7039650	Fads1	0.625973	-1.59751
7095593	Dnm1l	1.5967	1.5967
7077710	Hand1	0.626508	-1.59615
7316339	Atp6v1c1	1.59602	1.59602
7325131	Tmem19	0.62686	-1.59525
7237725	Zbtb43	1.59405	1.59405
7335072	Olr1326	1.59401	1.59401
7320679	Aqp5	0.627403	-1.59387
7231889	B2m	1.59212	1.59212
7363911	Atg9a	0.628246	-1.59173
7247701	Wfdc15a	0.628253	-1.59171
7303115	Lrpprc	1.59075	1.59075
7313363	Nfyb	1.58983	1.58983
7162635	Ippk	1.5892	1.5892
7168489	Galnt1	1.58843	1.58843
7142858	Arf4	1.58806	1.58806
7035407	Wee1	1.5865	1.5865
7314861	Nap1l1	1.58547	1.58547
7077638	Nmur2	0.630907	-1.58502
7071335	Chad	0.631803	-1.58277
7332794	Pgr	0.632121	-1.58197
7107856	Wdr42a	0.632615	-1.58074
7259030	Bcl2l14	0.632618	-1.58073
7051093	Kcnj14	1.58065	1.58065
7035638	Far1	1.57937	1.57937
7122867	Mepe	0.633238	-1.57918
7073975	Baiap2	1.5784	1.5784
7083497	Ccdc47	1.57802	1.57802
7234111	Mapre1	1.57793	1.57793
7079228	Nlgn2	0.633889	-1.57756
7291787	Dnajc8	1.57655	1.57655
7057323	Aldoa	0.634435	-1.5762
7362540	Orc2l	1.57557	1.57557
7311565	Rab10	1.57461	1.57461
7079865	Rph3al	0.635604	-1.57331
7217815	Gstt2	0.635603	-1.57331
7337301	Clpx	1.57329	1.57329
7285948	Gabbr2	0.636228	-1.57176
7342631	Olr1118	1.57157	1.57157
7078267	Rnf112	0.636431	-1.57126
7176216	Ndst1	0.637017	-1.56982
7373775	Clcn5	1.5691	1.5691
7073613	Slc9a3r1	0.637749	-1.56802
7083754	Cacng5	0.637836	-1.5678
7189868	Mocs2	1.56558	1.56558
7094537	Ccdc50	1.5643	1.5643
7093799	Kpna1	1.56373	1.56373
7057092	Gtf3c1	0.639622	-1.56342
7089868	Dgcr2	0.63994	-1.56265
7070936	Cuedc1	0.640134	-1.56217
7027862	Riok2	1.56166	1.56166
7075097	Paqr4	0.640619	-1.56099
7339171	Plscr4	0.640656	-1.5609
7102957	Sfrs9	1.56001	1.56001
7209291	Ssr3	1.55909	1.55909
7052670	Nr2f2	0.64154	-1.55875
7170723	Lmnb1	0.641568	-1.55868
7138366	Mcpt1	1.55772	1.55772
7266726	Egr4	0.642011	-1.5576
7200147	Gtf2b	1.55571	1.55571
7221511	RGD1309594	0.642809	-1.55567
7055280	Olr128	0.642853	-1.55557
7169197	Egr1	0.642891	-1.55547
7057298	Giyd2	0.642894	-1.55547
7072132	Cnp	0.643228	-1.55466
7077365	Hspa4	1.55457	1.55457
7195946	Insrr	0.643281	-1.55453
7361267	Txndc9	1.55428	1.55428
7098175	LOC360807	1.55211	1.55211
7171430	Sec11c	1.552	1.552
7361933	Mstn	0.644509	-1.55157
7053629	Sec11a	1.55156	1.55156
7053952	Olr12	0.644888	-1.55066
7078852	Ndel1	1.55018	1.55018
7064375	Prdx3	1.54887	1.54887
7176282	Slc26a2	0.64612	-1.5477
7042315	Scd	1.54676	1.54676
7258398	RGD1304952	0.646828	-1.54601
7229023	Hnrnpa3	1.54574	1.54574
7225246	Entpd2	1.54549	1.54549
7055227	Olr72	0.647958	-1.54331
7333382	Olr1191	0.648168	-1.54281
7356322	Accn4	0.648197	-1.54274
7034888	Olr91	0.648322	-1.54244
7229681	Olr581	0.64882	-1.54126
7228850	Scrn3	0.649001	-1.54083
7212722	Sars	1.54078	1.54078
7158619	Map3k8	1.54074	1.54074
7259303	Strap	1.53948	1.53948
7334922	Olr1220	0.649622	-1.53936
7083616	Ddx5	1.53808	1.53808
7073869	C1qtnf1	0.650381	-1.53756
7056218	Copb1	1.53754	1.53754
7242044	Hsd17b12	1.53599	1.53599
7072329	Rnd2	0.651539	-1.53483
7089449	Tbccd1	0.651551	-1.5348
7159019	Lgals8	1.53394	1.53394
7069492	Camkk1	0.65257	-1.5324
7196919	Cdc42se1	1.53123	1.53123
7035403	Zfp143	1.5312	1.5312
7241852	Cry2	0.653241	-1.53083
7375305	Dmd	0.653249	-1.53081
7059690	Npas4	0.654055	-1.52892
7295340	Srd5a2	0.654194	-1.5286
7180534	Cbfb	1.52853	1.52853
7035196	Syt9	0.654251	-1.52847
7358437	Ppp4r1	1.52816	1.52816
7221031	Zbtb22	0.654528	-1.52782
7160297	Pter	0.654984	-1.52676
7127466	Ywhah	0.655361	-1.52588
7034329	Gab2	1.52512	1.52512
7057283	Nupr1	1.52454	1.52454
7317826	Khdrbs3	1.52295	1.52295
7041050	Jak2	1.52261	1.52261
7179190	Fts	1.52251	1.52251
7217040	Kifc1	0.657445	-1.52104
7040734	Dmrt1	0.657553	-1.52079
7037256	Bag3	1.52043	1.52043
7096975	Adap1	0.658102	-1.51952
7301653	Yy1	1.5187	1.5187
7083515	Smarcd2	0.658552	-1.51848
7088477	Adprh	0.658732	-1.51807
7124261	Yt521	1.51721	1.51721
7304077	Hadhb	1.51562	1.51562
7225120	Il1rn	0.660217	-1.51465
7096865	Grifin	0.660231	-1.51462
7278220	Orc1l	0.660385	-1.51427
7340397	Prkar2a	1.51412	1.51412
7216362	Ppp1r11	0.660667	-1.51362
7130724	Pdhb	1.51284	1.51284
7259076	Crebl2	0.661118	-1.51259
7026326	Exoc3	1.51076	1.51076
7150616	Sh3rf1	1.51045	1.51045
7282350	Ube2j2	1.50962	1.50962
7162996	Gmpr	0.662523	-1.50938
7049937	Lsr	1.50818	1.50818
7092399	Cldnd1	1.5073	1.5073
7230908	Mpped2	0.663479	-1.50721
7217487	Slc37a1	0.663643	-1.50683
7210086	Gucy1b3	0.663703	-1.5067
7304910	Lpin1	0.663746	-1.5066
7181668	Cox4i1	1.50524	1.50524
7073458	Sstr2	0.664446	-1.50501
7055089	Inppl1	0.664774	-1.50427
7186468	Abcb10	0.664794	-1.50423
7220465	Nrm	0.664898	-1.50399
7185324	Dhodh	0.665356	-1.50295
7350032	Wdr6	0.665427	-1.50279
7291431	Sdc3	0.665531	-1.50256
7087533	Tfg	1.50245	1.50245
7220337	Rnf39	0.666166	-1.50113
7229582	Olr465	0.666284	-1.50086
7049520	Sipa1l3	0.66637	-1.50067
7232778	Cds2	0.666714	-1.49989
7072590	Arf2	1.49927	1.49927
7042758	Slk	1.49901	1.49901
7323953	Vezt	1.49843	1.49843
7037229	Armc5	0.667446	-1.49825
7056593	Syt17	0.66756	-1.49799
7349651	Atp2c1	1.49775	1.49775
7312906	Zfp414	0.668057	-1.49688
7285486	Vcp	1.49578	1.49578
7236188	Osbpl2	0.668601	-1.49566
7274931	Nr4a3	1.49557	1.49557
7058050	Ctbp2	1.49496	1.49496
7138855	Nupl1	1.49475	1.49475
7299338	Hif1a	1.49468	1.49468
7357073	B3gnt7	0.669157	-1.49442
7221577	Slc19a1	0.669782	-1.49302
7100976	Taf6	0.669927	-1.4927
7034633	Stard10	0.670033	-1.49246
7278332	Faf1	1.49226	1.49226
7089551	Ehhadh	0.670127	-1.49225
7113758	Rgs4	1.49184	1.49184
7340628	Cdc25a	0.670528	-1.49136
7075288	Gbl	0.67079	-1.49078
7376059	Gjb1	1.49049	1.49049
7091719	Atp5o	1.49045	1.49045
7055438	Trim3	0.671473	-1.48926
7091007	Atp5j	1.48903	1.48903
7161271	Olr1653	0.672063	-1.48796
7073828	2010-09-09	0.672127	-1.48781
7026855	Arid1b	0.672167	-1.48772
7070041	Nf1	1.48758	1.48758
7088936	Ppp1r2	1.48716	1.48716
7314113	Btg1	0.672514	-1.48696
7119867	Wdr1	1.48596	1.48596
7248915	Chrna4	0.673124	-1.48561
7353455	Zap70	0.673537	-1.4847
7282365	Sdf4	1.48453	1.48453
7101860	Bri3bp	0.673955	-1.48378
7248027	Stau1	1.48376	1.48376
7322000	Apba3	0.674083	-1.4835
7172368	Atp5a1	1.48331	1.48331
7381097	Pir	1.48321	1.48321
7309296	Sel1l	1.48236	1.48236
7283161	Lypla1	1.48222	1.48222
7235420	Eya2	0.674724	-1.48209
7072166	Stat5a	0.674763	-1.482
7322460	Hcn2	0.674977	-1.48153
7103277	Chek2	0.675237	-1.48096
7156763	Ssr1	1.48051	1.48051
7033518	Pde8a	1.48016	1.48016
7034498	Arrb1	0.675706	-1.47993
7254954	Suclg1	1.47967	1.47967
7336548	Cspg4	0.676079	-1.47912
7119919	Msx1	0.676221	-1.47881
7044269	Ltv1	1.47856	1.47856
7256019	Gpr175	0.676365	-1.47849
7188156	Hapln1	0.676721	-1.47771
7080367	Blmh	1.4776	1.4776
7238719	RGD1303272	1.47746	1.47746
7121804	Cct4	1.47679	1.47679
7113142	Dd25	1.47643	1.47643
7323479		0.677322	-1.4764
7163963	Wrnip1	1.47473	1.47473
7061580	Rfx3	1.47451	1.47451
7210593	Hapln2	0.678269	-1.47434
7268482	Atp2b2	0.678434	-1.47398
7075793	Itfg3	0.678687	-1.47343
7354140	Col3a1	0.67945	-1.47178
7181546	Hsbp1	1.47172	1.47172
7036914	Kctd13	0.6795	-1.47167
7137741	Chd8	1.47167	1.47167
7261885	Pon2	1.47158	1.47158
7099016	Svop	0.679562	-1.47154
7312458	Mknk2	0.679849	-1.47091
7197368	Gdap2	1.4708	1.4708
7384985	Renbp	0.679931	-1.47074
7171052	Csnk1a1	1.4697	1.4697
7233348	RGD1307465	0.680441	-1.46964
7089781	Comt	0.68047	-1.46957
7217094	Hmga1	1.46894	1.46894
7154942	Ctsql2	0.680777	-1.46891
7217793	Mmp11	0.681089	-1.46824
7326606	Ankrd46	0.681183	-1.46803
7271871	Ncoa2	0.681512	-1.46733
7357016	Itm2c	0.681703	-1.46691
7337404	Ppib	1.46686	1.46686
7229603	Olr477	0.681882	-1.46653
7253525	Doxl2	0.682074	-1.46612
7326261	Shmt2	0.682228	-1.46579
7322213	Reep6	0.682238	-1.46577
7072241	Cntnap1	0.682368	-1.46548
7174581	Apbb3	0.682498	-1.46521
7379235	Uba1	1.46479	1.46479
7092876	Cd47	0.683324	-1.46343
7269356	Slc2a3	1.46327	1.46327
7065192	RGD1310686	0.683421	-1.46323
7249535	Prkag2	0.683531	-1.46299
7255679	Tprkb	1.46216	1.46216
7047557	Cacng7	0.683925	-1.46215
7072544	Hexim1	0.684212	-1.46154
7042559	Nfkb2	0.684278	-1.4614
7264532	Znf467	0.684479	-1.46097
7305756	Tspan13	1.4607	1.4607
7331795	Slc11a2	0.68489	-1.46009
7083521	Gh1	0.685008	-1.45984
7115201	Rrp15	1.45892	1.45892
7347968	Tmem30a	1.4587	1.4587
7067284	Hnrph1	1.45836	1.45836
7279564	Psmb2	1.45755	1.45755
7274799	Ncbp1	1.45606	1.45606
7342906	Dnmt1	0.687579	-1.45438
7249868	Napepld	0.688204	-1.45306
7220672	Ehmt2	0.689001	-1.45138
7029919	Cyp2a3a	0.689152	-1.45106
7321992	Pip5k1c	0.689558	-1.4502
7137612	Ndrg2	0.689764	-1.44977
7129892	Ppp3cb	1.44927	1.44927
7095116	Eif2b5	1.44927	1.44927
7072530	Acbd4	0.690249	-1.44875
7335410	Usp2	0.690343	-1.44856
7163789	Prpf4b	1.44785	1.44785
7343928	Dcps	0.691026	-1.44712
7378989	Zcchc12	0.691277	-1.4466
7361389	Chst10	0.691338	-1.44647
7329136	Plec1	1.44617	1.44617
7383128	Chm	1.44599	1.44599
7084425	Hn1	1.44457	1.44457
7244823	Idh3B	1.44442	1.44442
7356958	Sp100	0.692392	-1.44427
7029720	Arhgef1	0.69264	-1.44375
7242576	Hipk3	1.44326	1.44326
7210459	Cd1d1	1.44321	1.44321
7347802	Gsta2	0.693356	-1.44226
7056223	Psma1	1.44172	1.44172
7384938	Idh3g	1.44164	1.44164
7190358	Dab2	1.44123	1.44123
7266826	Pcyox1	0.694177	-1.44055
7160640	Commd3	1.4402	1.4402
7051290	Tsg101	1.43927	1.43927
7055841	Tmem41b	1.43888	1.43888
7135395	Gpr180	0.695146	-1.43855
7176796	Rnmt	1.43821	1.43821
7065540	Caskin1	0.695356	-1.43811
7319736	Pim3	0.695606	-1.4376
7119727	Rab28	1.43755	1.43755
7060315	RGD1309216	0.696229	-1.43631
7099466	Snapc2	0.696264	-1.43624
7116263	Mapk10	0.696323	-1.43611
7102951	Msi1	0.696559	-1.43563
7318691	Triobp	0.696849	-1.43503
7352119	Slc29a1	0.697015	-1.43469
7312365	Slc39a3	0.697356	-1.43399
7259088	Cdkn1b	0.6974	-1.4339
7342926	S1pr2	0.697414	-1.43387
7314316	Kitlg	0.697552	-1.43358
7364920	Alpi	0.697645	-1.43339
7097865	Stx2	0.697799	-1.43308
7055188	Olr44	1.43276	1.43276
7297994	Scfd1	1.43275	1.43275
7160901	Yme1l1	1.43263	1.43263
7307503	Trim9	0.698298	-1.43205
7319028	Sgsm3	0.699447	-1.4297
7318646	Gga1	0.699686	-1.42921
7071868	Grb7	0.699716	-1.42915
7210568	RGD1311265	0.699936	-1.4287
7132704	Xkr6	0.700026	-1.42852
7305534	Hbp1	0.700542	-1.42747
7169212	Ctnna1	1.42528	1.42528
7025575	Hbs1l	1.42516	1.42516
7366080	Pja2	0.701969	-1.42456
7383621	Bex2	1.42449	1.42449
7322074	Sppl2b	0.702138	-1.42422
7050858	Rcn3	0.70234	-1.42381
7104994	Ripk5	0.702405	-1.42368
7084659	Exoc7	0.702741	-1.423
7241236	Olr502	0.702797	-1.42289
7325522	Cand1	1.42282	1.42282
7048423	Calm3	0.703268	-1.42193
7121514	Rab1	1.42179	1.42179
7093592	Gsk3b	1.42177	1.42177
7128639	Actr2	1.42149	1.42149
7312877	V1rg4	0.703824	-1.42081
7303997	Dpysl5	0.703979	-1.4205
7102491	Sds	0.704	-1.42045
7040998	Ppapdc2	0.704188	-1.42008
7350244	Pthr1	0.704495	-1.41946
7367946	Khsrp	0.704622	-1.4192
7286266	Abca1	0.704698	-1.41905
7031538	Bcat2	0.70479	-1.41886
7347380	Grinl1a	0.704826	-1.41879
7062834	Pi4k2a	0.704894	-1.41865
7220923	Tap1	0.706109	-1.41621
7040881	Vldlr	1.41569	1.41569
7384917	Pnck	0.707257	-1.41391
7258776	Foxm1	0.707447	-1.41353
7254365	Grid2	0.707613	-1.4132
7083984	Abca5	1.41296	1.41296
7166280	Klf6	1.41295	1.41295
7283429	Nsmaf	1.41222	1.41222
7180634	Pard6a	0.708203	-1.41202
7354261	Inpp1	1.41177	1.41177
7157438	Prl7d1	0.70843	-1.41157
7098915	RGD1307736	0.708467	-1.4115
7357820	Ppp1r7	1.41108	1.41108
7127205	Rgs12	0.708898	-1.41064
7311935	Cd63	1.41033	1.41033
7327070	Angpt1	0.709193	-1.41005
7196273	Kcnn3	0.709315	-1.40981
7221376	Glo1	1.40962	1.40962
7103011	Ankrd13a	1.40959	1.40959
7093390	Lsamp	0.70955	-1.40934
7257439	Vhl	1.40928	1.40928
7231802	LOC311352	0.709774	-1.4089
7290174	Lrrc41	1.40871	1.40871
7144222	Ssbp4	0.7099	-1.40865
7311495	Pdia6	1.40839	1.40839
7202670	Hmgcr	1.40791	1.40791
7371436	Sctr	0.710665	-1.40713
7040513	Apba1	0.710755	-1.40695
7246655	Trib3	0.711118	-1.40624
7106132	Ptgs2	0.711414	-1.40565
7238013	Olr416	1.40512	1.40512
7233023	Snap25	1.40437	1.40437
7290413	St3gal3	0.712277	-1.40395
7110775	Dars	1.40393	1.40393
7357599	Lrrfip1	1.40365	1.40365
7123163	Cops4	1.40335	1.40335
7127569	Limk2	0.712693	-1.40313
7082479	Krt20	0.712811	-1.4029
7342899	Eif3g	1.40276	1.40276
7224825	Arrdc3	1.40193	1.40193
7146459	Mak16	1.40176	1.40176
7367969	Lonp1	1.40168	1.40168
7247856	Cdh22	0.713625	-1.4013
7212995	Hmox3	0.714041	-1.40048
7318995	Tnrc6b	0.714923	-1.39875
7093551	Tmem39a	1.39838	1.39838
7321914	Aes	0.715112	-1.39838
7229760	Olr648	0.715222	-1.39817
7055136	Nup98	1.39806	1.39806
7031316	RGD1310111	0.715302	-1.39801
7049092	Rab4b	0.71543	-1.39776
7255711	Tgfa	0.716161	-1.39633
7320850	Scn8a	0.716281	-1.3961
7092946	Retnlg	0.716524	-1.39563
7383301	Nap1l3	1.39469	1.39469
7131876	LOC361041	0.717042	-1.39462
7184188	Lphn1	0.717309	-1.3941
7364216	Scg2	1.39387	1.39387
7174562	Hbegf	1.39227	1.39227
7357082	LOC501180	0.719321	-1.3902
7336777	Nptn	1.39009	1.39009
7315886	Arhgap9	0.719503	-1.38985
7249625	Cdk5	0.719666	-1.38953
7101275	Hspb1	1.38947	1.38947
7051021	Nucb1	1.38922	1.38922
7127099	Afap1	1.38733	1.38733
7045399	Ccdc127	0.720821	-1.38731
7091445	Sod1	1.38681	1.38681
7231028	Lin7c	1.38666	1.38666
7071340	Lrrc59	1.38643	1.38643
7335781	Cadm1	1.38633	1.38633
7036458	Plk1	0.721441	-1.38611
7097489	Ywhag	0.721465	-1.38607
7146803	Fnta	1.38581	1.38581
7208994	P2ry12	1.3858	1.3858
7236978	Card9	0.721644	-1.38572
7216624	RGD1302996	0.721859	-1.38531
7336978	Tle3	1.38525	1.38525
7092107	Hmgn1	1.38492	1.38492
7266790	Cml1	0.722709	-1.38368
7352311	Slc25a27	0.722833	-1.38345
7178211	Dync1li2	1.38328	1.38328
7331440	Vdr	0.72319	-1.38276
7089979	Pi4ka	1.38271	1.38271
7101690	Ran	1.38238	1.38238
7231536	Traf4af1	0.723417	-1.38233
7346396	Arih1	1.38232	1.38232
7098566	Tpcn1	0.7239	-1.38141
7051029	Ppp1r15a	0.724199	-1.38084
7330139	Naga	0.724634	-1.38001
7202072	Vcan	0.724647	-1.37998
7165251	Psma2	1.3795	1.3795
7060258	Fads2	0.724976	-1.37936
7299267	Mnat1	1.37873	1.37873
7062416	Cyp2c22	0.725671	-1.37803
7200490	Ssx2ip	1.37773	1.37773
7096070	Insr	0.726201	-1.37703
7093241	Ccdc52	0.726255	-1.37693
7209233	Slc33a1	0.726445	-1.37657
7365487	Pask	0.726548	-1.37637
7195927	Arhgef11	0.726619	-1.37624
7038793	Fgf4	0.72672	-1.37605
7060374	Tmem132a	0.726811	-1.37587
7363895	RGD735175	0.726933	-1.37564
7225615	Rxra	0.72776	-1.37408
7290251	Tmem69	1.37299	1.37299
7273870	Gabrr2	1.37276	1.37276
7325119	Rab21	1.37265	1.37265
7179857	LOC288913	0.728817	-1.37209
7077445	Slc22a5	0.728842	-1.37204
7092729	Cblb	1.37102	1.37102
7221026	Tapbp	0.729568	-1.37067
7377029	Armcx1	0.729593	-1.37063
7182059	Gnpat	1.37048	1.37048
7128774	Mdh1	1.37017	1.37017
7220796	Ager	0.729837	-1.37017
7231641	Tyro3	0.729895	-1.37006
7159989	Cdc123	1.36938	1.36938
7240324	Atp5g3	1.368	1.368
7041354	Pten	1.36789	1.36789
7103215	Pitpnb	1.36766	1.36766
7174403	Etf1	1.36713	1.36713
7083866	Rgs9	0.731527	-1.367
7379969	Wdr45	1.36681	1.36681
7069778	Ywhae	1.36666	1.36666
7222988	Ddx50	1.36541	1.36541
7116938	Cxcl9	0.732705	-1.36481
7042194	Morn4	0.732944	-1.36436
7107932	Tagln2	1.36398	1.36398
7108046	Olr1598	0.733793	-1.36278
7322066	Gadd45b	0.734465	-1.36154
7334980	Vwa5a	1.35993	1.35993
7350915	Gorasp1	0.73579	-1.35908
7098824	Hspb8	1.35835	1.35835
7122317	Psme4	1.35795	1.35795
7336831	Hexa	1.35726	1.35726
7226288	Tor2a	0.736833	-1.35716
7122174	Rtn4	1.35687	1.35687
7082052	Kpnb1	1.35669	1.35669
7029840	Tgfb1	1.35569	1.35569
7310777	Akt1	1.35545	1.35545
7217363	Ftsjd2	0.737861	-1.35527
7374979	Phex	0.738264	-1.35453
7320526	Cacnb3	0.738391	-1.3543
7234576	Rpn2	1.35417	1.35417
7155652	LOC306766	1.35389	1.35389
7270920	Recql	1.35329	1.35329
7216664	Vars2	0.739166	-1.35288
7068165	Mprip	1.35253	1.35253
7311793	Pan2	0.739562	-1.35215
7271832	Tram1	1.35213	1.35213
7075338	Rab26	0.739654	-1.35198
7322058	Thop1	0.739801	-1.35171
7258507	Scnn1a	0.739903	-1.35153
7161798	Smad5	1.35149	1.35149
7087376	Olr1562	0.74009	-1.35119
7145588	Slc25a4	1.35058	1.35058
7301400	Bdkrb2	1.35029	1.35029
7160039	Optn	0.740583	-1.35029
7298262	Srp54a	1.35024	1.35024
7113977	Sdhc	1.34995	1.34995
7079264	Slc2a4	0.74098	-1.34956
7363941	Resp18	1.34904	1.34904
7085170	Pcyt2	0.74129	-1.349
7050397	Plekhf1	0.741465	-1.34868
7196983	Ctsk	0.741768	-1.34813
7219733	Cd164	1.34777	1.34777
7120646	Xbp1	1.34723	1.34723
7091701	Cryzl1	0.742457	-1.34688
7259439	Capza3	0.742908	-1.34606
7306846	Slc25a21	0.743091	-1.34573
7316382	Rims2	1.34549	1.34549
7112701	Tor3a	0.743424	-1.34513
7307467	Cdkl1	1.34419	1.34419
7199656	Emcn	0.744287	-1.34357
7236237	Slco4a1	0.744937	-1.3424
7039884	Keg1	0.745797	-1.34085
7118171	Cnga1	0.746123	-1.34026
7084895	Lgals3bp	0.746146	-1.34022
7381109	Ace2	0.746217	-1.34009
7051241	Saa4	0.74745	-1.33788
7055418	Prkcdbp	0.747462	-1.33786
7378456	Nsdhl	1.33757	1.33757
7311776	Timeless	0.748121	-1.33668
7061389	Cbwd1	0.748259	-1.33644
7153582	Lamp1	1.33568	1.33568
7217331	Pim1	1.33566	1.33566
7253939	Chn2	0.748794	-1.33548
7235557	Ptpn1	1.33529	1.33529
7323377	Tdg	1.33313	1.33313
7321394	Erbb3	0.750458	-1.33252
7119891	Nsg1	0.750647	-1.33218
7059399	Tcirg1	0.751047	-1.33147
7332684	Mmp8	0.751092	-1.3314
7228160	Scn2a1	0.751326	-1.33098
7178411	Cdh8	0.751898	-1.32997
7221817	Ddt	0.75244	-1.32901
7082122	Snip	0.753234	-1.32761
7359866	Enpp5	0.753248	-1.32758
7098286	Camkk2	0.753328	-1.32744
7108733	Rab3gap2	1.32648	1.32648
7228563	Gad1	0.754304	-1.32573
7096610	Ocm	1.3253	1.3253
7132879	Stmn4	0.755035	-1.32444
7321384	Pa2g4	1.32427	1.32427
7281625	Gpr157	0.755369	-1.32386
7125587	Lias	0.755424	-1.32376
7094926	LOC303823	0.755891	-1.32294
7065253	Crebbp	1.32209	1.32209
7121279	Egfr	0.756497	-1.32188
7344317	Olr1273	0.756737	-1.32146
7032560	Sels	1.32128	1.32128
7042570	RGD1309313	0.756869	-1.32123
7029123	Prkd2	0.757003	-1.321
7225851	Spna2	1.32004	1.32004
7037175	Bckdk	0.757599	-1.31996
7267024	Rab7a	1.31996	1.31996
7356313	Gmppa	0.758103	-1.31908
7047566	Myadm	0.758208	-1.3189
7213191	Rtcd1	1.3189	1.3189
7060215	Rom1	0.758335	-1.31868
7188397	Tpo1	1.31841	1.31841
7046605	Pde10a	0.758593	-1.31823
7223847	Amd1	0.758647	-1.31814
7379258	Rgn	0.759185	-1.3172
7225443	Pnpla7	0.759472	-1.3167
7215239	Sh3glb1	1.31644	1.31644
7196852	Pi4kb	1.31525	1.31525
7029414	Rtn2	0.760718	-1.31455
7315848	Dctn2	1.31452	1.31452
7091079	Adamts1	1.31426	1.31426
7078060	Snap47	0.76127	-1.3136
7301177	Ubr7	0.761317	-1.31351
7072746	Efcab3	1.3125	1.3125
7039467	Stx5	0.762381	-1.31168
7380834	Mid1	0.76274	-1.31106
7378640	Ikbkg	0.762756	-1.31104
7059928	Arl2	0.762831	-1.31091
7283277	Plag1	0.76287	-1.31084
7095875	Ufd1l	1.31081	1.31081
7076487	Gabrg2	0.763439	-1.30986
7104905	Ctse	0.763704	-1.30941
7086772	Itsn1	1.30883	1.30883
7273018	Calb1	0.764238	-1.30849
7212561	Olr392	0.764428	-1.30817
7049079	Egln2	0.764484	-1.30807
7332570	Casp4	1.30713	1.30713
7374250	Pfkfb1	0.765054	-1.3071
7196073	RGD1303130	1.30665	1.30665
7301258	Serpina4	0.765435	-1.30645
7247256	Blcap	0.765512	-1.30632
7292070	Lypla2	1.30571	1.30571
7231855	Ctdspl2	1.30538	1.30538
7226995	Kynu	0.766107	-1.3053
7241615	Madd	0.766112	-1.30529
7247648	Serinc3	1.30444	1.30444
7169573	Pcdhb18	0.766636	-1.3044
7063839	Add3	0.76677	-1.30417
7241300	Olr545	0.76678	-1.30416
7097583	Clip2	0.766913	-1.30393
7197253	Notch2	1.30376	1.30376
7318953	Cacna1i	0.768477	-1.30128
7349310	Mras	0.768537	-1.30117
7242375	Trim44	0.76865	-1.30098
7034855	Olr59	0.76878	-1.30076
7333434	LOC500956	0.769101	-1.30022
7065524	Rnps1	1.29954	1.29954
7050130	Lrp3	0.769785	-1.29906
7121328	Cnrip1	0.770203	-1.29836
7220764	Atf6b	0.770235	-1.2983
7200293	2010-09-15	1.29828	1.29828
7377479	Xpnpep2	0.770289	-1.29821
7113339	LOC498265	0.770552	-1.29777
7046264	Dynlt1	1.29717	1.29717
7060249	Best1	0.771151	-1.29676
7138917	Sgcg	0.771239	-1.29661
7275155	Nipsnap3a	1.29644	1.29644
7216852	Cyp21a1	0.771392	-1.29636
7272306	Lyn	0.771425	-1.2963
7247045	Rbm39	1.29536	1.29536
7038898	Chka	0.772566	-1.29439
7253847	Tax1bp1	1.29402	1.29402
7217304	RGD735065	0.772902	-1.29383
7342952	Raver1	0.773104	-1.29349
7145697	Klkb1	0.773716	-1.29246
7244108	Slc30a4	1.29229	1.29229
7347783	Fbxo9	1.29188	1.29188
7115728	Cr1l	1.29096	1.29096
7319807	Shank3	0.775463	-1.28955
7081846	Nxph3	0.775676	-1.2892
7097100	Zscan21	0.775774	-1.28904
7255812	Gfpt1	1.28877	1.28877
7070122	Cpd	1.28858	1.28858
7310643	Rage	0.776056	-1.28857
7155237	Ubqln1	1.28827	1.28827
7039796	Mrpl16	1.28788	1.28788
7083746	Cacng4	1.28742	1.28742
7226261	Pomt1	0.777055	-1.28691
7071769	Lasp1	0.777574	-1.28605
7102483	Slc24a6	0.777654	-1.28592
7025548	Ahi1	1.28577	1.28577
7117319	ste2	0.777895	-1.28552
7295232	Fam98a	1.28541	1.28541
7217246	Lhfpl5	0.778025	-1.28531
7343020	Yipf2	0.778338	-1.28479
7209945	Rxfp1	0.77837	-1.28474
7210664	Lmna	1.28392	1.28392
7035116	Ilk	1.28336	1.28336
7106587	Nphs2	0.77938	-1.28307
7159479	Akr1cl2	0.779386	-1.28306
7047561	Prkcg	0.779726	-1.2825
7320812	Slc4a8	1.28177	1.28177
7326233	Pip4k2c	1.28148	1.28148
7269479	Ptpn6	0.780954	-1.28048
7216651	Ddr1	0.781378	-1.27979
7116549	Hnrpd	1.27976	1.27976
7257586	Cand2	0.781575	-1.27947
7197127	Lix1l	0.781762	-1.27916
7097612	Gtf2i	0.781903	-1.27893
7227688	Galnt5	0.782112	-1.27859
7249028	Rgs19	0.782191	-1.27846
7162003	Grk6	0.782339	-1.27822
7102927	Pxn	1.27807	1.27807
7098148	Abcb9	0.782606	-1.27778
7330647	Mapk12	0.782652	-1.27771
7088871	Lrrc33	1.27726	1.27726
7300349	RGD1563583	0.783142	-1.27691
7060180	Slc3a2	0.783704	-1.27599
7048696	Pvrl2	0.783958	-1.27558
7269053	Erc1	1.27488	1.27488
7041667	Hhex	0.786026	-1.27222
7266506	Sema4f	0.786426	-1.27158
7042049	Hps1	0.786541	-1.27139
7216827	Cfb	0.787591	-1.2697
7114657	Psen2	0.788545	-1.26816
7384924	Bcap31	1.26816	1.26816
7324052	Socs2	0.78872	-1.26788
7307276	Mdga2	0.788794	-1.26776
7179966	Pkn1	0.788821	-1.26771
7234606	Src	1.26741	1.26741
7063221	Pitx3	0.789442	-1.26672
7095530	Ppm1f	0.789802	-1.26614
7083011	Slc4a1	0.789825	-1.2661
7200000	Unc5c	0.790153	-1.26558
7127125	Acox3	0.790459	-1.26509
7098320	Atp2a2	1.26507	1.26507
7270933	Gys2	0.790706	-1.26469
7038853	Cpt1a	0.790804	-1.26454
7156552	Mak	0.790859	-1.26445
7059502	Ssh3	0.7909	-1.26438
7305030	Adam17	1.26373	1.26373
7049245	Psmc4	1.26279	1.26279
7378827	Gria3	0.792029	-1.26258
7163171	Phactr1	0.79214	-1.2624
7059414	Aldh3b1	0.793294	-1.26057
7281916	Icmt	0.793354	-1.26047
7065792	Narfl	0.793353	-1.26047
7335455	Dpagt1	0.793537	-1.26018
7085119	Nploc4	1.25989	1.25989
7095946	Timm44	0.793871	-1.25965
7111833	RGD1564614	0.794104	-1.25928
7211830	Pde4dip	1.25875	1.25875
7196511	S100a8	1.25837	1.25837
7168932	Bin1	1.2582	1.2582
7039168	Bles03	0.795458	-1.25714
7067146	Olr1392	0.79547	-1.25712
7227639	Gpd2	1.25695	1.25695
7139731	Sorbs3	0.795659	-1.25682
7218656	Psap	0.796045	-1.25621
7107800	Usf1	0.796122	-1.25609
7036943	Cdipt	1.25561	1.25561
7350070	Arih2	1.25526	1.25526
7078187	Flii	1.2552	1.2552
7116759	Paqr3	0.79724	-1.25433
7097931	Slc15a4	1.25316	1.25316
7183171	Slc6a2	0.798039	-1.25307
7039837	Olr336	0.798427	-1.25246
7123445	Anxa3	0.798488	-1.25237
7347584	Mapk6	1.25191	1.25191
7029822	Atp5sl	0.798867	-1.25177
7379245	Rbm10	1.2507	1.2507
7107717	Fcgr3a	0.799739	-1.25041
7241831	Mapk8ip1	0.800239	-1.24963
7191297	Ankh	0.800391	-1.24939
7149483	RGD1309676	1.24911	1.24911
7101851	Aacs	1.24894	1.24894
7334997	Olr1264	0.800835	-1.2487
7353257	Ptpn18	0.801095	-1.24829
7072187	Atp6v0a1	1.2474	1.2474
7215036	Pdlim5	0.801677	-1.24739
7267234	Nup210	0.801872	-1.24708
7042417	Sfxn3	0.80193	-1.24699
7292967	Mfn2	1.24694	1.24694
7040068	Gnaq	1.24654	1.24654
7168253	Dsg4	0.802224	-1.24654
7373726	Plp2	1.24537	1.24537
7232643	Atrn	1.24491	1.24491
7143222	Nt5dc2	0.803302	-1.24486
7250063	RGD1565355	0.80351	-1.24454
7328771	Ptk2	1.24424	1.24424
7210296	Arfip1	1.24391	1.24391
7049155	Pld3	0.804194	-1.24348
7049931	Usf2	0.804405	-1.24316
7301680	Begain	0.804453	-1.24308
7331331	Slc38a2	0.804803	-1.24254
7273124	Slc7a13	0.805096	-1.24209
7275225	Tmem38b	1.24018	1.24018
7150903	Hpgd	0.806531	-1.23988
7379943	Gripap1	1.23953	1.23953
7181836	Spg7	0.806968	-1.23921
7243115	Chrm5	0.807574	-1.23828
7303979	Tmem214	0.808664	-1.23661
7038710	Slc22a18	0.809231	-1.23574
7221506	Dnmt3l	0.809316	-1.23561
7180346	Tmem184c	0.80935	-1.23556
7324674	Ptprq	0.809498	-1.23533
7108888	Gpatc2	0.809728	-1.23498
7350155	Dhx30	0.809778	-1.23491
7208723	Ccna1	0.809908	-1.23471
7216745	Bat2	0.809961	-1.23463
7166920	Dclre1c	0.810354	-1.23403
7179052	Es22	0.810644	-1.23359
7330631	Hdac10	0.81093	-1.23315
7048315	Sepw1	0.811156	-1.23281
7114382	Fh1	1.23245	1.23245
7126510	Lap3	1.23231	1.23231
7341707	Kif15	0.811831	-1.23178
7099669	Kl	0.812022	-1.23149
7261126	Pclo	0.812151	-1.2313
7236449	Dnajc5	1.23074	1.23074
7323604	Nr1h4	1.23067	1.23067
7132790	Fbxo16	0.812983	-1.23004
7328494	Ndrg1	1.22999	1.22999
7325239	Cnot2	1.22953	1.22953
7097799	Gusb	1.22938	1.22938
7199454	Tacr3	0.813424	-1.22937
7216608	Mrps18b	0.813782	-1.22883
7166892	Fam107b	0.813963	-1.22856
7203733	Rab3c	0.814055	-1.22842
7176287	Ppargc1b	0.814058	-1.22841
7220784	Agpat1	0.814146	-1.22828
7280817	Ece1	0.814202	-1.2282
7080663	Slfn8	1.22802	1.22802
7375744	Heph	0.814344	-1.22798
7171226	Wdr7	0.815041	-1.22693
7102883	Rab35	0.815187	-1.22671
7273022	Nbn	1.22622	1.22622
7384956	L1cam	0.815615	-1.22607
7252128	Klhdc10	0.815673	-1.22598
7365728	Slco6c1	0.815927	-1.2256
7297043	Myt1l	1.22534	1.22534
7236770	Grin1	1.22506	1.22506
7059891	Capn1	0.816403	-1.22489
7265111	Pde1c	0.816492	-1.22475
7353809	Il1r2	0.817265	-1.22359
7035049	Cnga4	0.817274	-1.22358
7284380	Coq3	0.817641	-1.22303
7226642	Olr420	0.817945	-1.22258
7038312	Nlrp6	0.818071	-1.22239
7111814	Cfh	0.818212	-1.22218
7034056	Dlg2	0.818329	-1.222
7242031	Alkbh3	1.2219	1.2219
7059188	Cttn	1.22133	1.22133
7216784	Msh5	0.819056	-1.22092
7143533	Glud1	1.22045	1.22045
7339838	Ryk	1.22036	1.22036
7320471	Pfkm	0.819543	-1.22019
7194362	Selt	1.22008	1.22008
7216659	Gtf2h4	0.819762	-1.21987
7326333	Mterfd1	1.21982	1.21982
7119996	Mrfap1	1.21903	1.21903
7081342	Akap1	0.820328	-1.21902
7300253	Dlst	1.2188	1.2188
7334779	Tmem218	0.820587	-1.21864
7263668	Mtpn	1.21846	1.21846
7059831	Scyl1	0.820982	-1.21805
7155590	Uimc1	0.821082	-1.2179
7195983	Hdgf	0.821609	-1.21712
7384959	Arhgap4	0.821647	-1.21707
7127022	Ppp2r2c	0.822303	-1.2161
7132846	Clu	1.21587	1.21587
7031542	Fut1	0.822595	-1.21566
7127242	Add1	0.822845	-1.2153
7151389	Casp3	1.21513	1.21513
7155074	Isca1	0.82316	-1.21483
7034871	Olr78	1.21454	1.21454
7026297	Sdha	1.21412	1.21412
7378433	Gabre	0.824455	-1.21292
7234691	Bpi	0.824777	-1.21245
7195971	Sh2d2a	0.825154	-1.2119
7025345	Ifngr1	1.21184	1.21184
7069885	Flot2	1.21051	1.21051
7295757	Pomc	0.826245	-1.2103
7053534	Furin	0.826296	-1.21022
7057471	2010-09-01	0.826547	-1.20985
7075344	Tsc2	0.826901	-1.20933
7230653	Cat	0.827771	-1.20806
7232079	Slc12a1	0.827801	-1.20802
7253479	Gimap5	0.827896	-1.20788
7095487	Ydjc	0.828164	-1.20749
7082594	Krt1-5	1.20692	1.20692
7131335	Rnase4	0.828557	-1.20692
7199110	Dcm5	1.20648	1.20648
7034556	P4ha3	0.828954	-1.20634
7127936	Ddx56	0.829033	-1.20623
7241417	Olr666	0.829165	-1.20603
7031178	Klk10	0.829558	-1.20546
7169645	Rell2	0.829589	-1.20542
7236153	Gtpbp5	0.831206	-1.20307
7244553	Kcnip3	0.831627	-1.20246
7381338	Sh3kbp1	0.832705	-1.20091
7312242	Ncln	0.833103	-1.20033
7123709	Stbd1	1.1987	1.1987
7350899	Scn11a	0.834417	-1.19844
7264544	Rarres2	0.834486	-1.19834
7229912	Psmc3	1.19805	1.19805
7284103	Necab1	0.834827	-1.19785
7205006	Rai14	1.19748	1.19748
7231711	Capn3	0.835504	-1.19688
7127595	Smtn	0.835664	-1.19665
7355609	Cps1	0.835734	-1.19655
7280950	Pla2g2a	1.19651	1.19651
7150153	Lpl	1.19559	1.19559
7235185	Ywhab	1.19539	1.19539
7249894	LOC499980	0.837267	-1.19436
7330860	Abcd2	0.83747	-1.19407
7260997	Gnat3	0.838309	-1.19288
7049727	Psenen	1.19263	1.19263
7340453	Celsr3	0.838944	-1.19197
7107605	Rgs5	0.839032	-1.19185
7337900	Dyx1c1	0.839124	-1.19172
7342768	Olr1172	1.19039	1.19039
7348125	Lca5	0.840541	-1.18971
7340147	Cacna2d2	0.840572	-1.18967
7350886	Scn5a	0.840731	-1.18944
7374466	Clcn4-2	1.18898	1.18898
7105369	Ptpn7	0.84113	-1.18888
7171690	RGD1359600	0.841222	-1.18875
7349925	Gnai2	1.18874	1.18874
7079740		1.18861	1.18861
7305474	Dld	1.18819	1.18819
7347994	Impg1	0.841653	-1.18814
7104982	Nuak2	0.841945	-1.18773
7148281	RGD1305689	1.18728	1.18728
7099302	P2rx2	0.842438	-1.18703
7354224	Pms1	0.842605	-1.1868
7163698	Fars2	0.842749	-1.18659
7237514	Dyt1	1.18621	1.18621
7056608	Coq7	1.18594	1.18594
7230801	Wt1	0.843307	-1.18581
7378892	Atp1b4	0.843788	-1.18513
7075207	Amdhd2	0.843796	-1.18512
7248683	Sycp2	0.843796	-1.18512
7236343	Arfgap1	1.1844	1.1844
7257547	Syn2	0.84504	-1.18338
7326749	Klf10	0.845201	-1.18315
7225276	Abca2	0.845641	-1.18253
7078672	Myocd	0.846308	-1.1816
7154954	Tpbpa	0.84631	-1.1816
7089233	Cldn1	0.846656	-1.18112
7294823	Epas1	0.846789	-1.18093
7257576	Mkrn2	1.18016	1.18016
7334815	Robo4	0.847954	-1.17931
7091811	Rcan1	1.17915	1.17915
7374075	Chrdl1	0.8481	-1.17911
7243436	Rasgrp1	0.848772	-1.17817
7329201	Sharpin	0.848781	-1.17816
7066057	Stk10	0.849231	-1.17754
7047787	Epn1	0.850183	-1.17622
7318225	Grina	0.850239	-1.17614
7222244	Ank3	0.851626	-1.17422
7226272	Golga2	1.17278	1.17278
7083542	Icam2	0.852742	-1.17269
7367948	Gtf2f1	1.17241	1.17241
7379784	Sytl5	0.853725	-1.17134
7333714	Cnn1	0.854282	-1.17057
7170835	Isoc1	1.16966	1.16966
7222806	Unc5b	0.855382	-1.16907
7139070	Fdft1	1.16816	1.16816
7035427	Adm	1.16783	1.16783
7071980	Rara	1.16744	1.16744
7160164	Hspa14	0.856698	-1.16727
7232917	Plcb1	0.858112	-1.16535
7251761	Spam1	1.16488	1.16488
7353536	Inpp4a	0.85956	-1.16339
7378564	Ssr4	1.16247	1.16247
7150132	Atp6v1b2	1.16215	1.16215
7211368	Psmb4	1.16171	1.16171
7066232	Slit3	0.861088	-1.16132
7377933	LOC302845	0.861432	-1.16086
7143170	Itih4	0.862223	-1.15979
7217665	Pcbp3	0.862427	-1.15952
7061646	RGD1310039	0.862581	-1.15931
7186108	Mbtps1	0.863203	-1.15848
7353721	Rpl31	1.15828	1.15828
7330872	Slc2a13	0.863585	-1.15796
7259266	Ptpro	0.863821	-1.15765
7373718	Magix	0.864033	-1.15736
7160184	Olah	0.864185	-1.15716
7137511	Tep1	0.864188	-1.15716
7175969	2010-03-03	1.15711	1.15711
7133219	Gfra2	0.866424	-1.15417
7028931	Slc27a5	0.867699	-1.15247
7215277	Clca4	0.867812	-1.15232
7058599	Echs1	0.868002	-1.15207
7059319	Ighmbp2	0.86843	-1.1515
7341512	Ctnnb1	1.15094	1.15094
7336711	Ubl7	0.869203	-1.15048
7237475	Crat	0.869538	-1.15004
7059009	Th	1.14933	1.14933
7253507	Abp1	0.870282	-1.14905
7224157	Qrsl1	0.870962	-1.14816
7048688	Tomm40	1.14734	1.14734
7207625	Mccc1	0.871865	-1.14697
7138066	Slc7a8	1.14478	1.14478
7087018	Dyrk1a	1.14365	1.14365
7060124	Rtn3	1.14193	1.14193
7048321	Gltscr2	1.14155	1.14155
7237624	Dnm1	0.876607	-1.14076
7175139	Dpysl3	0.877361	-1.13978
7232590	Ptpra	1.13926	1.13926
7319505	Atxn10	1.13735	1.13735
7315422	Grip1	0.879572	-1.13692
7052390	Aldh1a3	0.879705	-1.13674
7039031	Pc	0.879892	-1.1365
7078953	Gucy2e	0.880488	-1.13573
7071880	Zpbp2	0.880603	-1.13559
7236199	Adrm1	0.880763	-1.13538
7094048	Zfp148	1.1348	1.1348
7184073	Cacna1a	0.881841	-1.13399
7290116	Cyp4a8	0.882949	-1.13257
7068974	Aurkb	0.883008	-1.13249
7269505	Eno2	1.12952	1.12952
7093534	B4galt4	1.1288	1.1288
7116933	Cxcl10	0.888136	-1.12595
7230135	Nyw1	1.12264	1.12264
7254187	V1rc18	0.891118	-1.12219
7043426	Habp2	0.892804	-1.12007
7120715	Ogdh	0.89404	-1.11852
7335948	Drd2	0.897484	-1.11423
7047191	Lnpep	0.898246	-1.11328
7094811	Eif4a2	1.11165	1.11165
7050720	Atf5	1.11145	1.11145
7329050	Pycrl	0.900651	-1.11031
7059851	Frmd8	0.90106	-1.1098
7035547	Parva	0.903482	-1.10683
7143272	Btd	0.904686	-1.10536
7062628	Slit1	0.904976	-1.105
7046399	Slc22a2	0.909791	-1.09915
7384127	Igsf1	0.910828	-1.0979
7279949	Col16a1	0.910909	-1.0978
7194074	Trpc4	0.918056	-1.08926
7216976	Slc39a7	0.918812	-1.08836
7180626	Ctcf	1.0835	1.0835
7067200	Mapk9	0.932713	-1.07214
7121718	Tmem17	1.07153	1.07153
7210794	Efna1	1.07143	1.07143
7214067	Egf	0.943137	-1.06029
7036726	Il4ra	0.944336	-1.05894
7115720	Cd46	1.0544	1.0544
7188333	Acot12	1.04489	1.04489

## Sheet: Supplementary Figure 10
Supplementary Figure 10
Transcript ID	Gene Symbol	Ratio(3-h vs 1-h)	Fold-Change(3-h vs 1-h)
7179800	Ier2	9.81975	9.81975
7197113	Txnip	0.267452	-3.73898
7221460	Snf1lk	2.95731	2.95731
7333634	Ldlr	5.96852	5.96852
7268883	Ret	1.85665	1.85665
7101220	Serpine1	41.1728	41.1728
7306585	Egln3	2.70781	2.70781
7068475	Trpv2	4.64497	4.64497
7101298	Por	2.8081	2.8081
7334627	Cdon	0.237848	-4.20436
7056205	Rras2	1.80567	1.80567
7338854	Cyb5r4	3.35485	3.35485
7259303	Strap	1.92477	1.92477
7326769	Azin1	4.1487	4.1487
7296563	Odc1	3.75891	3.75891
7169197	Egr1	89.5377	89.5377
7093551	Tmem39a	1.9426	1.9426
7178969	Hmox1	5.41252	5.41252
7039170	Fosl1	17.421	17.421
7304448	Rhob	2.27492	2.27492
7285739	Gne	0.600339	-1.66573
7301854	Dync1h1	1.24128	1.24128
7342768	Olr1172	1.59497	1.59497
7252206	Mkln1	1.49434	1.49434
7274931	Nr4a3	2.15825	2.15825
7065802	Fbxl16	0.501395	-1.99444
7332664	Mmp3	10.2742	10.2742
7324052	Socs2	0.64882	-1.54126
7049245	Psmc4	1.5542	1.5542
7279020	Slc2a1	4.86338	4.86338
7210794	Efna1	1.59298	1.59298
7060553	Olr322	0.816429	-1.22485
7232517	Sirpa	0.33663	-2.97062
7079952	Unc119	0.781771	-1.27915
7069088	Plscr3	0.767649	-1.30268
7233023	Snap25	0.797992	-1.25315
7199205	Lef1	3.2281	3.2281
7159775	Gata3	2.83848	2.83848
7059293	Ccnd1	0.382582	-2.61382
7218776	Sar1a	1.87532	1.87532
7127825	Kremen1	0.621769	-1.60831
7189518	Plk2	20.4952	20.4952
7263525	Akr1b1	2.11445	2.11445
7347608	Tmod3	0.830644	-1.20389
7071036	Trim25	5.04127	5.04127
7105257	Myog	0.766901	-1.30395
7363933	Ptprn	1.87186	1.87186
7120521	Lif	26.9274	26.9274
7175139	Dpysl3	0.589128	-1.69742
7068318	Kcnj12	0.312243	-3.20264
7282521	Rdh10	2.50679	2.50679
7071134	Mmd	4.22827	4.22827
7332679	Mmp10	8.42406	8.42406
7159019	Lgals8	2.25726	2.25726
7247754	Sdc4	1.68673	1.68673
7081342	Akap1	0.674313	-1.48299
7112993	Cacybp	1.35454	1.35454
7079865	Rph3al	0.599508	-1.66803
7031538	Bcat2	0.768751	-1.30081
7336978	Tle3	1.48255	1.48255
7305953	Arl4a	5.80937	5.80937
7214260	Sgms2	21.3058	21.3058
7067711	Slc36a1	0.163025	-6.13402
7031293	Syt3	0.761852	-1.31259
7071980	Rara	1.38576	1.38576
7174531	Nrg2	0.326573	-3.0621
7354140	Col3a1	0.808649	-1.23663
7320920	Nr4a1	5.58833	5.58833
7152929	Plat	4.81169	4.81169
7143155	Tmem110	0.430939	-2.32051
7048738	PVR	9.03697	9.03697
7039741	Prpf19	0.447364	-2.23531
7225677	Ralgds	0.499178	-2.00329
7207625	Mccc1	0.859392	-1.16361
7050720	Atf5	1.53564	1.53564
7185072	Smpd3	0.303778	-3.29188
7097412	Vgf	8.09917	8.09917
7117319	ste2	0.800074	-1.24988
7071340	Lrrc59	1.55199	1.55199
7111272	Btg2	7.22484	7.22484
7309859	Lgmn	0.745431	-1.3415
7136011	Samd8	2.67192	2.67192
7067118	Mgat1	3.11077	3.11077
7098535	Rph3a	0.463892	-2.15567
7142858	Arf4	1.76026	1.76026
7039650	Fads1	0.675282	-1.48086
7047191	Lnpep	0.605279	-1.65213
7166280	Klf6	4.20913	4.20913
7290429	Ptprf	1.72531	1.72531
7025269	Cited2	4.65548	4.65548
7148661	Prkcd	2.56023	2.56023
7067200	Mapk9	0.785947	-1.27235
7216651	Ddr1	0.692949	-1.44311
7309296	Sel1l	0.811468	-1.23233
7055089	Inppl1	0.619439	-1.61436
7089781	Comt	0.673499	-1.48478
7357016	Itm2c	0.669469	-1.49372
7373775	Clcn5	1.57023	1.57023
7122193	Sptbn1	1.30149	1.30149
7050691	Pold1	0.553574	-1.80644
7234595	Manbal	1.17146	1.17146
7162107	Unc5a	0.558909	-1.7892
7326142	Tspan31	1.32734	1.32734
7107605	Rgs5	1.69948	1.69948
7053895	Arnt2	0.526722	-1.89854
7338247	Gclc	2.29477	2.29477
7147187	Polb	1.26598	1.26598
7210088	Gucy1a3	0.23111	-4.32695
7059009	Th	1.37559	1.37559
7383301	Nap1l3	1.60968	1.60968
7294897	Tacstd1	2.69656	2.69656
7318691	Triobp	0.705226	-1.41799
7093534	B4galt4	1.19162	1.19162
7379235	Uba1	1.62795	1.62795
7113758	Rgs4	1.51242	1.51242
7139731	Sorbs3	0.809434	-1.23543
7281719	Errfi1	14.7633	14.7633
7183171	Slc6a2	0.666254	-1.50093
7279509	Stk40	3.45595	3.45595
7110956	Mapkapk2	2.94487	2.94487
7368000	Sema6b	0.357466	-2.79747
7154665	Zfp367	0.547926	-1.82506
7312877	V1rg4	1.24113	1.24113
7179948	Cd97	1.92547	1.92547
7370448	Uhrf1	0.492799	-2.02922
7083901	Amz2	0.607944	-1.64489
7174110	Syt4	1.27658	1.27658
7343909	St3gal4	2.87228	2.87228
7061389	Cbwd1	0.715104	-1.3984
7119867	Wdr1	2.08758	2.08758
7350155	Dhx30	0.694236	-1.44043
7169702	Ndfip1	1.17169	1.17169
7060258	Fads2	0.620872	-1.61064
7217282	Cdkn1a	3.34265	3.34265
7225851	Spna2	0.811498	-1.23229
7375305	Dmd	0.45508	-2.19742
7186468	Abcb10	0.715388	-1.39784
7179628	Dnaja2	2.53683	2.53683
7258550	Tnfrsf1a	2.49052	2.49052
7100179	Znf655	1.60089	1.60089
7029840	Tgfb1	1.86508	1.86508
7200444	Bcl10	5.06886	5.06886
7035427	Adm	1.90418	1.90418
7354298	Nab1	1.93333	1.93333
7119891	Nsg1	0.661581	-1.51153
7098920	Acads	0.561972	-1.77945
7331581	Rnd1	3.65053	3.65053
7125079	Slc10a4	0.297529	-3.36102
7210664	Lmna	1.93794	1.93794
7066057	Stk10	0.832706	-1.2009
7322501	Giot1	2.12042	2.12042
7198855	Camk2d	0.681625	-1.46708
7068974	Aurkb	0.843355	-1.18574
7064324	RGD1308127	2.65161	2.65161
7378564	Ssr4	1.18512	1.18512
7260283	Insig1	2.63854	2.63854
7045772	Syne1	0.83102	-1.20334
7312458	Mknk2	0.665317	-1.50304
7269505	Eno2	1.44455	1.44455
7314286	Dusp6	34.0522	34.0522
7220449	Ppp1r10	1.40061	1.40061
7043230	Dusp5	4.893	4.893
7228160	Scn2a1	0.660567	-1.51385
7341512	Ctnnb1	1.32384	1.32384
7081124	Cltc	1.68958	1.68958
7084899	Cant1	0.421987	-2.36974
7074039	Slc25a10	0.586642	-1.70462
7097489	Ywhag	0.787082	-1.27051
7144691	Sc4mol	4.56929	4.56929
7283909	Ppm2c	5.13088	5.13088
7132871	Trim35	0.443363	-2.25549
7271871	Ncoa2	0.620916	-1.61052
7079195	Fgf11	0.408918	-2.44548
7066011	Dusp1	1.82964	1.82964
7348411	Snap91	1.88127	1.88127
7099302	P2rx2	0.630798	-1.58529
7127466	Ywhah	0.723963	-1.38129
7045399	Ccdc127	0.619586	-1.61398
7232331	Dusp2	1.75517	1.75517
7084614	Acox1	1.85787	1.85787
7196919	Cdc42se1	1.95699	1.95699
7308187	Atp6v1d	1.53823	1.53823
7358936	Yes1	1.27437	1.27437
7357599	Lrrfip1	1.19555	1.19555
7148827	Mettl6	4.05572	4.05572
7139530	Nefm	6.90259	6.90259
7321914	Aes	0.81101	-1.23303
7217304	RGD735065	0.621162	-1.60989
7334980	Vwa5a	0.863294	-1.15835
7082775	Stat3	3.0699	3.0699
7075793	Itfg3	0.848615	-1.17839
7130724	Pdhb	1.15813	1.15813
7084719	Cygb	0.54754	-1.82635
7072991	Psmd12	1.4117	1.4117
7216664	Vars2	0.783979	-1.27555
7296103	Sdc1	2.57268	2.57268
7175969	2010-03-03	1.36525	1.36525
7058599	Echs1	0.744872	-1.34251
7094048	Zfp148	0.806697	-1.23962
7197150	Pias3	0.431861	-2.31556
7039697	Cybasc3	0.643694	-1.55353
7239774	Scn7a	2.3748	2.3748
7188450	Dmgdh	1.15217	1.15217
7331539	Adcy6	0.541886	-1.84541
7288744	Jun	1.63605	1.63605
7065192	RGD1310686	0.620956	-1.61042
7048865	Atp1a3	0.764796	-1.30754
7154650	Ctsl1	2.76705	2.76705
7246655	Trib3	1.50432	1.50432
7294823	Epas1	0.657088	-1.52187
7236199	Adrm1	1.26223	1.26223
7133143	Egr3	16.4813	16.4813
7312263	Nfic	0.553321	-1.80727
7358437	Ppp4r1	1.46391	1.46391
7257144	Bhlhb2	2.16997	2.16997
7194141	Smad9	0.294303	-3.39786
7290174	Lrrc41	1.85721	1.85721
7026855	Arid1b	0.697214	-1.43428
7152208	Ppp2cb	2.13185	2.13185
7305756	Tspan13	1.23246	1.23246
7349142	Zbtb38	2.13781	2.13781
7115090	Mark1	1.49109	1.49109
7077710	Hand1	0.408928	-2.44542
7151297	Dctd	0.384408	-2.6014
7239391	Rbms1	1.59001	1.59001
7266497	Hk2	2.32375	2.32375
7322460	Hcn2	0.823919	-1.21371
7284803	Pnrc1	1.5603	1.5603
7326677	Ncald	0.319563	-3.12927
7036726	Il4ra	0.8311	-1.20323
7048696	Pvrl2	1.25452	1.25452
7376078	Ogt	0.772538	-1.29444
7233587	Cst8	1.23762	1.23762
7072132	Cnp	0.584845	-1.70985
7120384	Pik3ip1	0.283797	-3.52364
7354973	Nol5	1.64044	1.64044
7120646	Xbp1	1.83183	1.83183
7159028	Mtr	0.797666	-1.25366
7319028	Sgsm3	0.737849	-1.35529
7051029	Ppp1r15a	1.79983	1.79983
7250063	RGD1565355	0.916722	-1.09084
7075573	Haghl	0.82715	-1.20897
7097556	Limk1	0.498913	-2.00436
7338277	Elovl5	1.28408	1.28408
7218656	Psap	0.708408	-1.41162
7035196	Syt9	0.674899	-1.4817
7081754	Xylt2	0.526218	-1.90035
7263775	Creb3l2	1.72875	1.72875
7159665	Pfkfb3	1.80153	1.80153
7179739	Junb	4.92205	4.92205
7151923	Tusc3	1.92014	1.92014
7255936	Gata2	0.536836	-1.86277
7302329	Ptprn2	0.92286	-1.08359
7143988	Myo9b	1.47511	1.47511
7326749	Klf10	1.35183	1.35183
7259266	Ptpro	0.896648	-1.11526
7209796	Pdcd10	1.63746	1.63746
7231855	Ctdspl2	0.775922	-1.28879
7123757	Uso1	1.72665	1.72665
7115720	Cd46	0.887992	-1.12614
7208994	P2ry12	2.12652	2.12652
7127569	Limk2	0.607743	-1.64543
7312161		4.15814	4.15814
7205095	Tars	2.05496	2.05496
7051105	Emp3	3.931	3.931
7354355	Obfc2a	7.91533	7.91533
7309626	Eml5	2.44576	2.44576
7203733	Rab3c	0.608406	-1.64364
7312684	Olr1087	0.275174	-3.63407
7194202	Dclk1	3.99704	3.99704
7329050	Pycrl	1.24396	1.24396
7236770	Grin1	1.38119	1.38119
7034743	Phox2a	0.513399	-1.9478
7196273	Kcnn3	0.648706	-1.54153
7243115	Chrm5	1.22143	1.22143
7231536	Traf4af1	0.507321	-1.97114
7039087	Slc29a2	0.583969	-1.71242
7046399	Slc22a2	1.2146	1.2146
7092107	Hmgn1	0.808399	-1.23701
7040139	RGD1311350	1.83885	1.83885
7073869	C1qtnf1	0.592046	-1.68906
7049155	Pld3	0.908722	-1.10045
7097612	Gtf2i	0.658186	-1.51933
7037175	Bckdk	0.760721	-1.31454
7080663	Slfn8	0.78321	-1.2768
7235557	Ptpn1	1.76452	1.76452
7168932	Bin1	1.5288	1.5288
7081853	Ngfr	0.543621	-1.83952
7329479	Apol9a	1.3763	1.3763
7049312	Zfp36	2.17522	2.17522
7364446	Irs1	2.75823	2.75823
7314252	Atp2b1	1.45696	1.45696
7048423	Calm3	0.685477	-1.45884
7160453	Arl5b	8.29392	8.29392
7029999	Sertad1	3.94713	3.94713
7038853	Cpt1a	0.718624	-1.39155
7212722	Sars	1.57889	1.57889
7071769	Lasp1	0.616452	-1.62219
7036598	Lcmt1	1.63866	1.63866
7335234	Vof16	0.597888	-1.67255
7093799	Kpna1	1.32137	1.32137
7042315	Scd	1.55956	1.55956
7331795	Slc11a2	0.622122	-1.6074
7249899	Ptpn12	1.46524	1.46524
7075088	Tnfrsf12a	6.04752	6.04752
7046023	Tfb1m	0.538042	-1.85859
7140047	Itm2b	1.5437	1.5437
7082251	Fbxl20	0.304822	-3.2806
7178564	Got2	1.46512	1.46512
7247648	Serinc3	1.10999	1.10999
7317471	Myc	1.48366	1.48366
7166920	Dclre1c	0.878021	-1.13892
7144059	Gtpbp3	0.575156	-1.73866
7082845	Becn1	1.31776	1.31776
7249637	Kcnh2	0.595271	-1.67991
7075288	Gbl	0.629326	-1.589
7335072	Olr1326	2.058	2.058
7025275		4.06687	4.06687
7089979	Pi4ka	1.34706	1.34706
7047557	Cacng7	0.696079	-1.43662
7202670	Hmgcr	2.83619	2.83619
7346776	Rab11a	1.37982	1.37982
7174562	Hbegf	1.94809	1.94809
7354261	Inpp1	1.83238	1.83238
7186299	Rnf166	0.515684	-1.93917
7343376	Glb1l3	1.14829	1.14829
7380834	Mid1	0.91013	-1.09874
7365728	Slco6c1	0.921902	-1.08471
7194362	Selt	0.798933	-1.25167
7035407	Wee1	1.89527	1.89527
7103011	Ankrd13a	1.73783	1.73783
7328919	Arc	4.15281	4.15281
7347626	Tmod2	0.512717	-1.95039
7056223	Psma1	1.59846	1.59846
7097527	Pom121	1.20979	1.20979
7375057	Sat1	2.35459	2.35459
7078852	Ndel1	1.7425	1.7425
7098424	Sh2b3	2.84571	2.84571
7243648	Ehd4	2.27974	2.27974
7237530	Fnbp1	0.731615	-1.36684
7329380	MGC94207	0.521344	-1.91812
7176287	Ppargc1b	0.6221	-1.60746
7318097	RGD1359378	0.483424	-2.06858
7374114	Acsl4	1.85508	1.85508
7091811	Rcan1	1.47535	1.47535
7132982	Nefl	3.10454	3.10454
7176282	Slc26a2	0.536409	-1.86425
7065540	Caskin1	0.676765	-1.47762
7079944	Eral1	0.665946	-1.50162
7241615	Madd	0.672597	-1.48677
7363911	Atg9a	0.683968	-1.46206
7326630	Ywhaz	1.55062	1.55062
7154722	Ptch1	0.41505	-2.40935
7204207	Isl1	1.49034	1.49034
7207664	Anxa5	2.45578	2.45578
7304910	Lpin1	0.717134	-1.39444
7356958	Sp100	0.872688	-1.14588
7059866	Pola2	0.338439	-2.95474
7365598	Chchd2	2.48406	2.48406
7241852	Cry2	0.77444	-1.29125
7251998	Fam71f1	1.28691	1.28691
7062628	Slit1	1.13997	1.13997
7111227	Atp2b4	0.51192	-1.95343
7143222	Nt5dc2	0.847675	-1.1797
7359866	Enpp5	0.585649	-1.70751
7059502	Ssh3	0.803588	-1.24442
7046605	Pde10a	0.903959	-1.10624
7160184	Olah	0.738022	-1.35497
7180346	Tmem184c	0.67797	-1.47499
7285948	Gabbr2	0.811342	-1.23253
7237624	Dnm1	0.928041	-1.07754
7050858	Rcn3	0.83866	-1.19238
7085814	Robo1	0.893368	-1.11936
7363941	Resp18	1.4553	1.4553
7359745	Nfkbie	0.504805	-1.98096
7146953	Adam9	0.702174	-1.42415
7322448	Palm	0.604907	-1.65315
7091588	Synj1	1.57671	1.57671
7350504	Ccr4	2.74066	2.74066
7078060	Snap47	0.561401	-1.78126
7055344	Ubqlnl	0.587789	-1.70129
7112009	Rgs2	8.71924	8.71924
7290413	St3gal3	0.859656	-1.16326
7357034	Psmd1	1.45805	1.45805
7340628	Cdc25a	0.747163	-1.3384
7046271	Ezr	1.92086	1.92086
7323355	Txnrd1	1.44963	1.44963
7137113	Ero1l	2.76021	2.76021
7199110	Dcm5	0.75913	-1.3173
7122174	Rtn4	1.31257	1.31257
7063991	Gucy2g	1.21876	1.21876
7270920	Recql	0.827979	-1.20776
7226272	Golga2	0.770472	-1.29791
7137537	Tmem55b	0.759523	-1.31662
7204170	Itga1	1.58444	1.58444
7083515	Smarcd2	0.703294	-1.42188
7040513	Apba1	0.626945	-1.59504
7101860	Bri3bp	0.597555	-1.67349
7345103	Pafah1b2	0.821406	-1.21743
7231802	LOC311352	0.830743	-1.20374
7308057	Sptb	0.781718	-1.27923
7337271	Parp16	0.559209	-1.78824
7274003	Cga	3.79082	3.79082
7210709	Syt11	0.294742	-3.3928
7233997	Cox4i2	1.35689	1.35689
7314682	Ppp1r12a	1.37448	1.37448
7087533	Tfg	1.57446	1.57446
7336395	Chrna5	0.504854	-1.98077
7349310	Mras	0.679741	-1.47115
7049937	Lsr	1.96027	1.96027
7158671	Crem	2.6427	2.6427
7057298	Giyd2	0.634686	-1.57558
7091079	Adamts1	1.25511	1.25511
7063839	Add3	0.551054	-1.8147
7042479	RGD1307648	0.725681	-1.37802
7280817	Ece1	0.828319	-1.20726
7258232	Dcir2	1.23992	1.23992
7251008	C1galt1	0.816825	-1.22425
7325438	Rap1b	2.09169	2.09169
7121804	Cct4	1.82848	1.82848
7342906	Dnmt1	0.602786	-1.65896
7149849	Jund	0.795893	-1.25645
7312214	Gna11	0.770373	-1.29807
7220764	Atf6b	0.879525	-1.13698
7098148	Abcb9	0.847859	-1.17944
7029617	RGD1309888	1.22029	1.22029
7073734	Sphk1	1.26569	1.26569
7332064	Krt8	5.87671	5.87671
7342926	S1pr2	0.682404	-1.46541
7307503	Trim9	0.773882	-1.29219
7287531	Dbc1	2.34004	2.34004
7081797	Pdk2	0.527316	-1.89639
7107856	Wdr42a	0.659379	-1.51658
7242375	Trim44	0.655077	-1.52654
7131725	Mmp14	1.89058	1.89058
7294686	Ppm1b	1.21254	1.21254
7340323	Ihpk1	0.581179	-1.72064
7209445	Lxn	2.39442	2.39442
7042688	Cnnm2	0.597398	-1.67393
7034056	Dlg2	0.780491	-1.28124
7170182	Eif1a	1.5261	1.5261
7353536	Inpp4a	0.697029	-1.43466
7069295	Rabep1	1.39067	1.39067
7224157	Qrsl1	0.696246	-1.43627
7137256	Gch1	2.06616	2.06616
7333714	Cnn1	1.10872	1.10872
7028931	Slc27a5	0.891898	-1.1212
7116933	Cxcl10	1.12012	1.12012
7171533	Impa2	0.549461	-1.81997
7197127	Lix1l	0.811306	-1.23258
7342417	RGD1309534	0.545542	-1.83304
7099669	Kl	0.831272	-1.20298
7285914	Coro2a	0.638525	-1.56611
7211368	Psmb4	1.33178	1.33178
7196852	Pi4kb	1.4223	1.4223
7114652	Cabc1	0.583854	-1.71276
7094926	LOC303823	0.740565	-1.35032
7314872	Phlda1	6.75849	6.75849
7244553	Kcnip3	0.705996	-1.41644
7311711	Prim1	0.750059	-1.33323
7259439	Capza3	1.30205	1.30205
7262941	Gpr37	8.7743	8.7743
7036961	Mylpf	0.596592	-1.67619
7357820	Ppp1r7	1.15439	1.15439
7217094	Hmga1	2.32582	2.32582
7192885	Mfn1	1.59371	1.59371
7261126	Pclo	0.791826	-1.2629
7370427	Safb	0.725138	-1.37905
7384127	Igsf1	0.940352	-1.06343
7269203	Bid	2.34673	2.34673
7050130	Lrp3	0.69096	-1.44726
7278272	Nrd1	1.31948	1.31948
7199454	Tacr3	0.861837	-1.16031
7083103	Dcakd	0.606027	-1.65009
7343093	Ecsit	0.633396	-1.57879
7084659	Exoc7	0.646356	-1.54713
7130367	Psmd6	1.3968	1.3968
7248027	Stau1	1.56476	1.56476
7064901	Carhsp1	0.614379	-1.62766
7093390	Lsamp	0.792049	-1.26255
7054711	Capn5	0.553117	-1.80794
7073828	2010-09-09	0.615948	-1.62351
7289706	LOC366431	0.63311	-1.57951
7033518	Pde8a	1.47514	1.47514
7091445	Sod1	1.32139	1.32139
7072410	G6pc3	1.81917	1.81917
7176216	Ndst1	0.665821	-1.5019
7249028	Rgs19	0.868205	-1.1518
7352119	Slc29a1	0.748796	-1.33548
7230135	Nyw1	1.18147	1.18147
7081240	Dynll2	0.652652	-1.53221
7354636	Coq10b	3.02654	3.02654
7322304	Atp5d	1.7004	1.7004
7312496	Rexo1	1.12621	1.12621
7131085	Lgals3	2.83258	2.83258
7335100	Scn3b	0.623817	-1.60304
7134502	Klf5	2.52844	2.52844
7353721	Rpl31	1.27694	1.27694
7125450	Uchl1	1.28985	1.28985
7376059	Gjb1	1.25024	1.25024
7132413	Cab39l	0.556446	-1.79712
7253525	Doxl2	0.8071	-1.239
7035116	Ilk	1.37033	1.37033
7191297	Ankh	0.837298	-1.19432
7272445	Sdcbp	1.88196	1.88196
7093592	Gsk3b	1.47576	1.47576
7095183	Klhl24	0.33001	-3.03021
7354224	Pms1	0.766872	-1.304
7096947	Zfand2a	2.48612	2.48612
7291142	Gja4	1.40341	1.40341
7233348	RGD1307465	0.625383	-1.59902
7095530	Ppm1f	0.634399	-1.5763
7039002	Ppp1ca	1.24336	1.24336
7208723	Ccna1	0.833073	-1.20038
7339171	Plscr4	0.651295	-1.5354
7247856	Cdh22	0.832195	-1.20164
7323953	Vezt	1.44939	1.44939
7238013	Olr416	1.74835	1.74835
7098915	RGD1307736	0.624776	-1.60057
7208932	Siah2	1.39329	1.39329
7084895	Lgals3bp	0.730807	-1.36835
7348125	Lca5	1.1584	1.1584
7223998	RGD1311358	0.54224	-1.8442
7069228	Arrb2	0.376677	-2.65479
7070080	Taok1	1.38439	1.38439
7151794	Slc7a2	0.460471	-2.17169
7244305	Cops2	1.34637	1.34637
7217815	Gstt2	0.548739	-1.82236
7328771	Ptk2	1.15814	1.15814
7180634	Pard6a	0.646977	-1.54565
7217249	Mapk14	0.582804	-1.71584
7187867	Lysmd3	1.9701	1.9701
7138917	Sgcg	0.80297	-1.24538
7215036	Pdlim5	0.824737	-1.21251
7034498	Arrb1	0.641699	-1.55836
7152119	Dusp4	3.60437	3.60437
7163698	Fars2	0.891531	-1.12167
7046264	Dynlt1	1.74917	1.74917
7328765	Eif2c2	0.869659	-1.14988
7337714	RGD1307526	1.51756	1.51756
7162635	Ippk	1.74056	1.74056
7341147	Abhd5	2.09213	2.09213
7260744	Psmc2	1.68508	1.68508
7050397	Plekhf1	0.706106	-1.41622
7197996	Psma5	1.57751	1.57751
7361267	Txndc9	1.44715	1.44715
7059602	Rbm4b	1.44911	1.44911
7278220	Orc1l	0.714432	-1.39971
7188397	Tpo1	1.18871	1.18871
7258776	Foxm1	0.73858	-1.35395
7257439	Vhl	2.10564	2.10564
7046360	Tcp1	2.4095	2.4095
7219301	Tspyl4	0.425443	-2.35049
7212548	Cept1	1.52491	1.52491
7171690	RGD1359600	0.696802	-1.43513
7217363	Ftsjd2	0.721894	-1.38524
7327773	RGD1310852	0.320622	-3.11893
7069188	Asgr1	1.13867	1.13867
7149805	Rab3a	0.380495	-2.62816
7194074	Trpc4	0.853151	-1.17212
7211447	Mllt11	2.48459	2.48459
7098824	Hspb8	1.73364	1.73364
7218847	Kpna5	1.62926	1.62926
7269356	Slc2a3	1.18416	1.18416
7343401	Jam3	0.76911	-1.3002
7072590	Arf2	2.41967	2.41967
7101275	Hspb1	2.02478	2.02478
7038410	Tmem80	0.754274	-1.32578
7325522	Cand1	1.32529	1.32529
7270947	Kcnj8	1.3343	1.3343
7137124	Fermt2	1.60565	1.60565
7257547	Syn2	0.80367	-1.24429
7322518	Olr1083	1.28559	1.28559
7334779	Tmem218	0.738708	-1.35371
7139070	Fdft1	1.20588	1.20588
7235918	Vapb	0.648567	-1.54186
7381555	Prkx	1.96351	1.96351
7235185	Ywhab	1.28455	1.28455
7213434	Ptbp2	0.733344	-1.36362
7285235	Smu1	1.49745	1.49745
7318456	Commd5	0.655727	-1.52502
7063221	Pitx3	0.735508	-1.3596
7060315	RGD1309216	0.688286	-1.45288
7057092	Gtf3c1	0.674726	-1.48208
7221034	Daxx	0.751509	-1.33066
7366871	Tyms	0.530693	-1.88433
7225246	Entpd2	1.78057	1.78057
7241521	Olr737	1.527	1.527
7039467	Stx5	0.772513	-1.29448
7154954	Tpbpa	0.836727	-1.19513
7048952	Lipe	0.733915	-1.36256
7339605	Cep70	0.59582	-1.67836
7063113	Mgea5	1.45521	1.45521
7139682	Rhobtb2	0.383544	-2.60726
7096070	Insr	0.714362	-1.39985
7137511	Tep1	0.867806	-1.15233
7301177	Ubr7	0.553153	-1.80782
7195994	mrpl24	0.730444	-1.36903
7267234	Nup210	0.81691	-1.22413
7241236	Olr502	1.3493	1.3493
7259030	Bcl2l14	0.803457	-1.24462
7236401	Zgpat	0.570735	-1.75213
7346735	Map2k1	1.55064	1.55064
7354030	RGD1310553	0.663223	-1.50779
7336623	Rpp25	0.332021	-3.01186
7322080	Oaz1	1.38252	1.38252
7181836	Spg7	0.844354	-1.18434
7311935	Cd63	1.74397	1.74397
7337587	Anxa2	2.37985	2.37985
7288291	Adfp	3.00368	3.00368
7055334	Olr144	0.602595	-1.65949
7104994	Ripk5	0.668754	-1.49532
7313379	LOC362863	0.769365	-1.29977
7363784	Fev	0.572458	-1.74685
7038312	Nlrp6	0.785077	-1.27376
7216624	RGD1302996	0.80306	-1.24524
7329802	Csnk1e	1.29288	1.29288
7236188	Osbpl2	0.664638	-1.50458
7317317	Sqle	3.37091	3.37091
7202093	Xrcc4	1.50542	1.50542
7347831	Slc17a5	0.542651	-1.84281
7210086	Gucy1b3	0.575173	-1.73861
7329864	Cbx6	0.418383	-2.39015
7092946	Retnlg	1.35609	1.35609
7280406	Pafah2	0.70171	-1.42509
7061354	Fam122a	2.30331	2.30331
7340453	Celsr3	0.829543	-1.20548
7082646	Hap1	0.530873	-1.88369
7234606	Src	1.24486	1.24486
7089868	Dgcr2	0.594609	-1.68178
7341027	Cmtm6	1.63927	1.63927
7110915	Pfkfb2	0.680051	-1.47048
7323604	Nr1h4	1.28881	1.28881
7321992	Pip5k1c	0.765242	-1.30678
7025345	Ifngr1	1.12715	1.12715
7342728	Olr1138	0.535866	-1.86614
7037921	Glrx3	1.69041	1.69041
7147197	Vdac3	1.56443	1.56443
7359554	Klc4	0.720509	-1.38791
7251936	Snd1	1.12493	1.12493
7121279	Egfr	0.796063	-1.25618
7297043	Myt1l	0.826162	-1.21042
7113977	Sdhc	1.40875	1.40875
7232474	Ttl	0.64224	-1.55705
7384956	L1cam	0.714002	-1.40056
7340175	Rassf1	1.23497	1.23497
7217040	Kifc1	0.667472	-1.49819
7072166	Stat5a	0.719787	-1.3893
7306743	Garnl1	1.40712	1.40712
7362540	Orc2l	1.35776	1.35776
7206103	Car2	2.25919	2.25919
7138855	Nupl1	1.31009	1.31009
7161271	Olr1653	0.817675	-1.22298
7327087	Eif3e	1.86775	1.86775
7367946	Khsrp	0.648597	-1.54179
7144222	Ssbp4	0.727947	-1.37373
7225443	Pnpla7	0.832669	-1.20096
7216859	Ppt2	0.540023	-1.85177
7237701	Slc2a8	0.585766	-1.70717
7112701	Tor3a	0.639468	-1.5638
7166946	Nmt2	0.849612	-1.17701
7055421	Apbb1	0.485828	-2.05834
7319505	Atxn10	1.25607	1.25607
7079771	Pafah1b1	0.795311	-1.25737
7291431	Sdc3	0.748149	-1.33663
7322695	Zpf799	0.464227	-2.15412
7300895	Zc3h14	1.64633	1.64633
7095946	Timm44	0.659947	-1.51527
7190101	Hmgcs1	2.34688	2.34688
7065661	Clcn7	0.608776	-1.64264
7324397	RGD1307947	0.532046	-1.87954
7169573	Pcdhb18	0.698776	-1.43107
7089177	Uts2d	1.32466	1.32466
7094920	Senp2	1.80362	1.80362
7363895	RGD735175	0.629155	-1.58943
7257708	Olr829	2.18144	2.18144
7146803	Fnta	1.55332	1.55332
7127205	Rgs12	0.690291	-1.44866
7224825	Arrdc3	1.87426	1.87426
7087722	Alcam	2.26989	2.26989
7076487	Gabrg2	0.855955	-1.16829
7225276	Abca2	0.856523	-1.16751
7079740		1.33058	1.33058
7336777	Nptn	1.34809	1.34809
7313174	Cry1	1.87153	1.87153
7344723	Tmem24	1.30049	1.30049
7186267	Slc7a5	1.72027	1.72027
7143103	Tkt	1.19108	1.19108
7130447	Cadps	1.57594	1.57594
7049727	Psenen	1.31978	1.31978
7102927	Pxn	1.55712	1.55712
7382506	Cited1	2.81943	2.81943
7043932	Map3k7ip2	1.35405	1.35405
7111091	Nfasc	0.592881	-1.68668
7155617	Sncb	0.801042	-1.24837
7249625	Cdk5	0.693611	-1.44173
7028549	Il11	2.77411	2.77411
7067702	Gm2a	0.622375	-1.60675
7066232	Slit3	0.850689	-1.17552
7285486	Vcp	1.47559	1.47559
7100976	Taf6	0.743403	-1.34517
7300127	Ptgr2	0.815416	-1.22637
7378456	Nsdhl	1.23999	1.23999
7169549	Pcdhb12	0.704514	-1.41942
7328457	Kcnq3	0.799914	-1.25013
7332636	Dcun1d5	1.42708	1.42708
7221817	Ddt	0.775773	-1.28904
7056128	Btbd10	2.1536	2.1536
7280452	Rhd	1.17763	1.17763
7071805	Crkrs	1.83409	1.83409
7039287	Sf1	1.61393	1.61393
7380548	RragB	0.690287	-1.44867
7087119	Wrb	0.478175	-2.09128
7028706	Vom2r31	1.38611	1.38611
7322074	Sppl2b	0.745529	-1.34133
7070793	Ptrh2	0.681463	-1.46743
7060551	Olr321	2.70746	2.70746
7222988	Ddx50	1.47498	1.47498
7074098	Slc16a3	1.6549	1.6549
7059319	Ighmbp2	0.776181	-1.28836
7061646	RGD1310039	0.767698	-1.3026
7097400	Plod3	1.48737	1.48737
7155497	Pdlim7	1.50438	1.50438
7035067	Fxc1	0.664618	-1.50462
7195927	Arhgef11	0.625979	-1.5975
7065811	Jmjd8	0.776906	-1.28716
7099740	Brca2	0.729172	-1.37142
7209338	Ccnl1	1.44949	1.44949
7060215	Rom1	0.753129	-1.32779
7122317	Psme4	1.4968	1.4968
7242031	Alkbh3	1.32052	1.32052
7319165	Tef	0.359272	-2.7834
7043637	Pnliprp1	1.30029	1.30029
7059399	Tcirg1	0.78699	-1.27066
7069277	Eno3	1.30805	1.30805
7144206	Pgpep1	0.461321	-2.16769
7362580	Trak2	0.796612	-1.25532
7037256	Bag3	2.11563	2.11563
7144378	Gatad2a	1.32218	1.32218
7097380	Rabl5	0.675736	-1.47987
7286266	Abca1	0.624711	-1.60074
7069158	Gabarap	1.43719	1.43719
7145588	Slc25a4	1.56037	1.56037
7249610	Fastk	0.55269	-1.80933
7104395	Ccdc93	0.681491	-1.46737
7280950	Pla2g2a	1.18768	1.18768
7234164	Smgb	1.16841	1.16841
7137638	Zfp219	0.625905	-1.59769
7320850	Scn8a	0.619807	-1.61341
7348389	Me1	1.68437	1.68437
7300349	RGD1563583	0.87561	-1.14206
7220503	Ier3	2.13721	2.13721
7074519	Ciita	1.24404	1.24404
7199563	Slc39a8	1.13889	1.13889
7155590	Uimc1	0.740835	-1.34983
7216659	Gtf2h4	0.750274	-1.33285
7320698	Accn2	0.577358	-1.73203
7031542	Fut1	0.85647	-1.16758
7312242	Ncln	0.730061	-1.36975
7253507	Abp1	0.861095	-1.16131
7177448	Ccdc5	0.522499	-1.91388
7236153	Gtpbp5	0.750231	-1.33292
7056218	Copb1	1.46739	1.46739
7320471	Pfkm	0.870846	-1.14831
7380771	Shroom2	1.83671	1.83671
7169300	Cxxc5	0.838366	-1.1928
7211349	Snx27	0.71361	-1.40133
7226642	Olr420	0.875774	-1.14185
7241275	Olr527	0.668653	-1.49554
7051093	Kcnj14	1.32668	1.32668
7155074	Isca1	0.777889	-1.28553
7094811	Eif4a2	1.14846	1.14846
7300253	Dlst	1.29772	1.29772
7162996	Gmpr	0.679148	-1.47243
7072187	Atp6v0a1	1.33474	1.33474
7089551	Ehhadh	0.650666	-1.53689
7027116	Igf2r	0.768563	-1.30113
7190677	Amacr	0.418629	-2.38875
7329540	Txn2	1.48145	1.48145
7199710	Map2k1ip1	2.14928	2.14928
7173081	Usp14	1.44163	1.44163
7082163	Pip4k2b	0.486345	-2.05615
7145933	Mtus1	0.591676	-1.69012
7341707	Kif15	0.695898	-1.43699
7318818	Ddx17	0.739506	-1.35225
7325131	Tmem19	0.557828	-1.79267
7228850	Scrn3	0.652518	-1.53253
7249535	Prkag2	0.593355	-1.68533
7270558	Wbp11	1.55446	1.55446
7380334	Alg13	1.94858	1.94858
7326606	Ankrd46	0.777696	-1.28585
7178572	Slc38a7	0.671911	-1.48829
7037213	Itgam	1.08492	1.08492
7299961	Sipa1l1	1.37541	1.37541
7057320	Ppp4c	1.32614	1.32614
7312906	Zfp414	0.697612	-1.43346
7174403	Etf1	1.36559	1.36559
7268482	Atp2b2	0.740697	-1.35008
7170785	Slc12a2	1.7907	1.7907
7079228	Nlgn2	0.625076	-1.59981
7191852	Snx16	2.10919	2.10919
7147145	Ap3m2	0.75926	-1.31707
7332570	Casp4	1.29643	1.29643
7061738	Ermp1	0.786725	-1.27109
7188378	Dhfr	0.644232	-1.55224
7096358	Slc7a1	1.53485	1.53485
7080610	Rffl	0.613456	-1.63011
7270178	Ly49i4	0.754922	-1.32464
7118521	Ugdh	1.7145	1.7145
7127099	Afap1	1.40461	1.40461
7206781	Crh	2.50256	2.50256
7098320	Atp2a2	1.22998	1.22998
7166170	Idi1	3.25853	3.25853
7225615	Rxra	0.608965	-1.64213
7268462	Tmem111	1.55568	1.55568
7067495	Skp1	1.42172	1.42172
7059908	Tm7sf2	0.6961	-1.43657
7304743	Ddx1	1.36915	1.36915
7186897	Itgb1	1.81335	1.81335
7250350	Dmtf1	2.18151	2.18151
7036914	Kctd13	0.767126	-1.30357
7326333	Mterfd1	1.38991	1.38991
7103277	Chek2	0.496349	-2.01471
7222734	Ddit4	1.37405	1.37405
7049931	Usf2	0.830751	-1.20373
7237652	Slc25a25	1.59602	1.59602
7230908	Mpped2	0.634698	-1.57555
7289221	Jak1	1.37962	1.37962
7199523	Ube2d3	1.73866	1.73866
7342631	Olr1118	1.37587	1.37587
7216302	Olr1744	0.745637	-1.34114
7282350	Ube2j2	1.67892	1.67892
7383569	Armcx6	0.390367	-2.56169
7303997	Dpysl5	0.667915	-1.4972
7318430	Lrrc14	0.474707	-2.10656
7096708	Actb	1.42234	1.42234
7038793	Fgf4	0.771004	-1.29701
7298926	Arf6	1.34211	1.34211
7377153	MGC109340	2.99704	2.99704
7340397	Prkar2a	1.28622	1.28622
7274290	Ubap1	1.77424	1.77424
7137630	Rnase13	0.589649	-1.69593
7384938	Idh3g	1.24698	1.24698
7059414	Aldh3b1	0.794383	-1.25884
7135395	Gpr180	0.61841	-1.61705
7113339	LOC498265	0.650812	-1.53654
7081846	Nxph3	0.716331	-1.396
7031338	Kcnc3	0.649201	-1.54036
7082052	Kpnb1	1.42417	1.42417
7234045	Pofut1	0.636879	-1.57016
7179966	Pkn1	0.740425	-1.35058
7058717	Rnh1	1.60557	1.60557
7034871	Olr78	1.39336	1.39336
7220672	Ehmt2	0.654237	-1.5285
7356322	Accn4	0.551822	-1.81218
7188333	Acot12	1.07854	1.07854
7059928	Arl2	0.78288	-1.27734
7040998	Ppapdc2	0.648071	-1.54304
7176768	Ptpn2	1.64369	1.64369
7073975	Baiap2	1.8046	1.8046
7039833	Olr329	1.83865	1.83865
7309166	Porf1	2.29378	2.29378
7200000	Unc5c	0.759428	-1.31678
7094141	Tnk2	0.538884	-1.85569
7059891	Capn1	0.808555	-1.23677
7092876	Cd47	0.637857	-1.56775
7198031	Clcc1	0.51564	-1.93934
7311793	Pan2	0.667305	-1.49857
7374075	Chrdl1	0.906576	-1.10305
7171226	Wdr7	0.791668	-1.26316
7078187	Flii	1.27768	1.27768
7382690	Abcb7	0.783968	-1.27556
7098313	Ift81	0.619997	-1.61291
7052670	Nr2f2	0.520127	-1.92261
7099545	Retn	0.788096	-1.26888
7209291	Ssr3	1.33443	1.33443
7218117	Phyhipl	2.05074	2.05074
7036943	Cdipt	1.32292	1.32292
7274787	Tdrd7	1.1998	1.1998
7380731	Gpr173	0.51891	-1.92711
7231028	Lin7c	1.26923	1.26923
7075083	Thoc6	1.38372	1.38372
7061580	Rfx3	1.3259	1.3259
7340407	Ihpk2	1.69915	1.69915
7217458	Abcg1	0.633955	-1.5774
7250653	Cyp51	2.65286	2.65286
7233862	Fkbp1a	1.95134	1.95134
7257576	Mkrn2	1.2213	1.2213
7048947	Pafah1b3	1.37098	1.37098
7052227	Chrna7	0.639199	-1.56446
7223847	Amd1	0.848438	-1.17864
7035138	Olr203	2.88013	2.88013
7351515	Satb1	0.688532	-1.45236
7246335	P22k15	1.23117	1.23117
7180626	Ctcf	1.06835	1.06835
7075338	Rab26	0.623846	-1.60296
7121799	Zrsr1	2.63698	2.63698
7306846	Slc25a21	0.654418	-1.52808
7072530	Acbd4	0.739872	-1.35159
7318897	Syngr1	0.58303	-1.71518
7142961	Wnt5a	0.470868	-2.12374
7182786	Ccl22	1.44598	1.44598
7254775	Rnf103	1.61435	1.61435
7107932	Tagln2	1.40541	1.40541
7050055	Gpi	1.2841	1.2841
7299556	Fut8	0.638355	-1.56653
7057437	Kif22	0.872673	-1.14591
7332258	Nfe2	0.777765	-1.28574
7055188	Olr44	1.33917	1.33917
7266826	Pcyox1	0.655464	-1.52564
7127242	Add1	0.806429	-1.24003
7248977	Stmn3	1.92854	1.92854
7031844	Slc6a5	1.25945	1.25945
7358744	Zfp161	0.302673	-3.3039
7343928	Dcps	0.793493	-1.26025
7038395	Phrf1	1.48492	1.48492
7216740	Aif1	1.25506	1.25506
7279763	A3galt2	0.577074	-1.73288
7286823	Lpar1	3.02105	3.02105
7223824	Slc16a10	0.556534	-1.79684
7092399	Cldnd1	1.34492	1.34492
7230653	Cat	0.747149	-1.33842
7115455	Atf3	2.01262	2.01262
7226634	Olr410	1.39444	1.39444
7330631	Hdac10	0.746138	-1.34023
7248966	Gmeb2	1.80824	1.80824
7236927	Ubac1	0.584127	-1.71196
7205006	Rai14	1.21883	1.21883
7337301	Clpx	1.6906	1.6906
7065631	Hagh	1.41031	1.41031
7108223	Zfp238	0.444866	-2.24787
7166892	Fam107b	0.842553	-1.18687
7096350	Ubl3	1.45521	1.45521
7197958	Gstm5	1.73545	1.73545
7094170	Pcyt1a	1.44868	1.44868
7063981	Gpam	0.437304	-2.28674
7342735	Olr1144	0.375818	-2.66086
7033513	Slc28a1	1.24052	1.24052
7071308	Tob1	0.561107	-1.78219
7367948	Gtf2f1	1.16861	1.16861
7095047	Ece2	0.690415	-1.4484
7138556	Cryl1	1.2826	1.2826
7039661	Syt7	0.727408	-1.37474
7332206	Calcoco1	0.708591	-1.41125
7174508	Dnajc18	0.585576	-1.70772
7196707	S100a10	3.1452	3.1452
7249868	Napepld	0.579966	-1.72424
7038805	Fgf15	1.55565	1.55565
7127022	Ppp2r2c	0.780805	-1.28073
7285757	Rnf38	0.609851	-1.63974
7229558	Olr445	1.5632	1.5632
7060259	Fen1	0.454659	-2.19945
7234111	Mapre1	1.4756	1.4756
7178179	Rrad	2.63368	2.63368
7027862	Riok2	1.64195	1.64195
7039031	Pc	0.915382	-1.09244
7200293	2010-09-15	1.34694	1.34694
7036197	Acsm2	1.18804	1.18804
7211830	Pde4dip	1.17883	1.17883
7101690	Ran	1.59863	1.59863
7179190	Fts	1.33293	1.33293
7329878	Cbx7	0.443871	-2.25291
7209233	Slc33a1	0.675845	-1.47963
7302296	Zfp386	0.578104	-1.72979
7071898	Psmd3	1.2954	1.2954
7361021	Ugcgl1	0.714159	-1.40025
7320883	Acvr1b	0.514333	-1.94427
7035547	Parva	0.880869	-1.13524
7225419	Zmynd19	0.581253	-1.72042
7031186	Klk6	1.32278	1.32278
7069778	Ywhae	1.22797	1.22797
7055438	Trim3	0.734039	-1.36233
7064478	Lkap	0.77022	-1.29833
7082318	Nr1d1	0.422299	-2.36799
7123163	Cops4	1.4073	1.4073
7137612	Ndrg2	0.745085	-1.34213
7049112	Itpkc	2.73669	2.73669
7247031	Rbm12	1.95635	1.95635
7371237		0.492582	-2.03012
7106824	Tnr	0.775238	-1.28993
7112678	Soat1	1.25028	1.25028
7297994	Scfd1	1.29452	1.29452
7038227	Cyp2e1	1.42935	1.42935
7340193	Hyal2	0.660838	-1.51323
7236449	Dnajc5	1.28265	1.28265
7233853	Nsfl1c	1.09865	1.09865
7160640	Commd3	1.45859	1.45859
7132704	Xkr6	0.59932	-1.66856
7258398	RGD1304952	0.737255	-1.35638
7197368	Gdap2	1.46643	1.46643
7182059	Gnpat	1.36456	1.36456
7053714	Btbd1	0.811423	-1.2324
7225380	Pmpca	0.853638	-1.17146
7255502	Vax2	1.53763	1.53763
7366722	Mrlc2	1.39009	1.39009
7177129	Smad4	0.898882	-1.11249
7031596	Dbp	0.574312	-1.74121
7180783	Cyb5b	0.522853	-1.91258
7359438	Med20	1.51949	1.51949
7217793	Mmp11	0.681922	-1.46644
7083866	Rgs9	0.762713	-1.31111
7187674	Glrx1	2.72278	2.72278
7260183	Rnf32	0.791642	-1.2632
7169555	Pcdhb14	0.465126	-2.14995
7031665	Myod1	1.76227	1.76227
7105447	Tnni1	1.33817	1.33817
7313363	Nfyb	1.71992	1.71992
7211162	Ivl	0.626509	-1.59615
7069161	MGC94192	1.33823	1.33823
7095487	Ydjc	0.862248	-1.15976
7029822	Atp5sl	0.775635	-1.28927
7316024	Mtdh	1.47723	1.47723
7064438	RGD1305733	1.3202	1.3202
7254954	Suclg1	1.60372	1.60372
7114382	Fh1	1.34184	1.34184
7158619	Map3k8	1.7382	1.7382
7297093	Tmem18	0.856455	-1.1676
7272306	Lyn	0.686509	-1.45665
7095875	Ufd1l	1.37025	1.37025
7330139	Naga	0.692871	-1.44327
7343020	Yipf2	0.729103	-1.37155
7057365	Taok2	0.814285	-1.22807
7105438	Phlda3	0.400644	-2.49598
7309244	Gtf2a1	0.725611	-1.37815
7131237	Olr1614	2.01749	2.01749
7303330	Fbxo11	1.57441	1.57441
7240324	Atp5g3	1.41007	1.41007
7133039	Stc1	2.39166	2.39166
7293717	Prkcz	0.466346	-2.14433
7327745	Derl1	1.46079	1.46079
7299626	Eif2s1	1.69259	1.69259
7114850	Enah	0.672909	-1.48609
7363313	Lancl1	0.531642	-1.88096
7309953	Ddx24	1.38819	1.38819
7305474	Dld	1.16641	1.16641
7215770	Nexn	0.789964	-1.26588
7301400	Bdkrb2	1.35759	1.35759
7210568	RGD1311265	0.626498	-1.59618
7241355	Olr604	1.41992	1.41992
7065253	Crebbp	1.24166	1.24166
7226125	Freq	1.20795	1.20795
7127790	Nefh	0.728959	-1.37182
7072746	Efcab3	1.30772	1.30772
7057471	2010-09-01	0.829587	-1.20542
7146459	Mak16	1.46998	1.46998
7292070	Lypla2	1.36859	1.36859
7071868	Grb7	0.646601	-1.54655
7353831	Il1rl2	1.22332	1.22332
7180534	Cbfb	1.40534	1.40534
7025143	Hivep2	0.59344	-1.68509
7241357	Olr607	1.69263	1.69263
7053534	Furin	0.865386	-1.15555
7039277	Ehd1	0.536723	-1.86316
7113785	Hsd17b7	1.78187	1.78187
7116759	Paqr3	0.721267	-1.38645
7036898	Doc2a	0.599524	-1.66799
7333533	Qtrt1	1.34302	1.34302
7217487	Slc37a1	0.597442	-1.6738
7097865	Stx2	0.656819	-1.52249
7108050	Olr1601	1.73544	1.73544
7216976	Slc39a7	0.931261	-1.07381
7293185	Kif1b	0.720912	-1.38713
7184284	Ucp1	1.2389	1.2389
7062159	Ppp1r3c	0.50273	-1.98914
7172144	Smad7	0.678124	-1.47466
7229912	Psmc3	1.16	1.16
7109226	Kcnh1	0.789526	-1.26658
7031607	Rpl18	1.63645	1.63645
7326203	Geft	0.745695	-1.34103
7334997	Olr1264	0.737857	-1.35528
7323057	Fbxo7	1.25229	1.25229
7085119	Nploc4	1.22444	1.22444
7220803	Pbx2	0.616779	-1.62133
7088167	Zdhhc23	0.516839	-1.93484
7232778	Cds2	0.593688	-1.68439
7055467	Tpp1	0.793564	-1.26014
7197253	Notch2	1.35489	1.35489
7034343	Ndufc2	1.4518	1.4518
7121514	Rab1	1.38105	1.38105
7079393	Slc25a11	0.839259	-1.19153
7059188	Cttn	1.18414	1.18414
7295541	Eif2b4	1.5899	1.5899
7092729	Cblb	1.31685	1.31685
7230801	Wt1	0.827198	-1.2089
7299267	Mnat1	1.26542	1.26542
7291098	Ncdn	0.792386	-1.26201
7129810	Camk2g	0.633861	-1.57763
7206812	Gyg1	1.35309	1.35309
7318995	Tnrc6b	0.642488	-1.55645
7216519	RT1-N3	1.72334	1.72334
7127125	Acox3	0.798917	-1.25169
7069492	Camkk1	0.614466	-1.62743
7258140	M6pr	2.73741	2.73741
7361389	Chst10	0.766086	-1.30534
7084754	Sfrs2	1.13192	1.13192
7305534	Hbp1	0.707643	-1.41314
7189151	Sgtb	0.800242	-1.24962
7190358	Dab2	1.64198	1.64198
7089233	Cldn1	0.823714	-1.21401
7038208	Olr310	0.558169	-1.79157
7258629	Fgf6	1.41837	1.41837
7371436	Sctr	0.648665	-1.54163
7323377	Tdg	1.41542	1.41542
7055914	rnf141	0.600192	-1.66613
7108561	Capn8	1.33737	1.33737
7112632	Tor1aip1	1.58637	1.58637
7056593	Syt17	0.634828	-1.57523
7236343	Arfgap1	1.19277	1.19277
7300914		1.38769	1.38769
7089449	Tbccd1	0.711933	-1.40463
7282063	RGD1304567	0.655972	-1.52445
7284380	Coq3	0.762539	-1.31141
7103215	Pitpnb	1.34156	1.34156
7075207	Amdhd2	0.874305	-1.14377
7174581	Apbb3	0.599238	-1.66879
7034905	Olr110	0.504157	-1.98351
7347380	Grinl1a	0.763651	-1.3095
7266023	Mat2a	1.60274	1.60274
7183304	Rbl2	0.55697	-1.79543
7361254	Mitd1	0.538384	-1.85741
7370002	P4ha1	1.64441	1.64441
7236631	Pax8	1.19839	1.19839
7063243	Psd	0.65645	-1.52335
7255734	Tia1	0.483938	-2.06638
7266609	Tex261	0.626087	-1.59722
7276628	Snapc3	1.82644	1.82644
7378640	Ikbkg	0.72408	-1.38106
7271135	Kras	1.95667	1.95667
7102951	Msi1	0.730417	-1.36908
7097593	Gtf2ird1	0.77024	-1.2983
7101851	Aacs	1.20738	1.20738
7315979	Pgcp	1.43923	1.43923
7221921	Gnaz	0.455079	-2.19742
7049520	Sipa1l3	0.654225	-1.52853
7235499	Arfgef2	0.83191	-1.20205
7191382	Krt18	3.23587	3.23587
7270288	Tas2r121	1.96077	1.96077
7332244	Smug1	0.506818	-1.9731
7330065	Tob2	1.2682	1.2682
7078267	Rnf112	0.604851	-1.6533
7080367	Blmh	1.38021	1.38021
7283429	Nsmaf	1.3063	1.3063
7217541	Pdxk	0.64969	-1.5392
7179767	Calr	1.20723	1.20723
7335700	Bace1	0.684793	-1.4603
7057923	RGD1305014	1.8872	1.8872
7336729	Cyp11a1	1.11997	1.11997
7253186	Olr807	1.86474	1.86474
7092373	Gabrr3	1.35096	1.35096
7058761	Mucdhl	1.18214	1.18214
7099016	Svop	0.741447	-1.34871
7341471	Entpd3	1.29568	1.29568
7062917	Scd1	2.53883	2.53883
7257586	Cand2	0.788406	-1.26838
7116416	Ccdc98	0.654292	-1.52837
7204067	Pelo	2.43222	2.43222
7232493	Slc20a1	1.57716	1.57716
7301653	Yy1	1.37948	1.37948
7210593	Hapln2	0.646126	-1.54769
7118679	LOC498368	0.568561	-1.75883
7040314	Aldh1a1	0.911045	-1.09764
7310053	Serpina3k	1.29709	1.29709
7342746	Olr1158	0.427915	-2.33691
7079397	Pfn1	1.54164	1.54164
7055377	Olr170	0.565268	-1.76907
7098175	LOC360807	1.46299	1.46299
7131960	Irf9	0.526661	-1.89875
7252128	Klhdc10	0.798291	-1.25268
7183968	Prdx2	1.5901	1.5901
7217104	Pacsin1	0.640802	-1.56054
7056040	Dkk3	0.634969	-1.57488
7363142	Fzd5	0.546288	-1.83053
7320574	Prph	0.727488	-1.37459
7352070	Vegfa	1.52941	1.52941
7244859	Fam113a	0.688485	-1.45247
7208990	P2ry13	1.60545	1.60545
7274059	LOC683494	3.76469	3.76469
7244914	Prosapip1	0.482338	-2.07323
7262292	Tmem106b	0.514125	-1.94505
7257571	Tsen2	0.709949	-1.40855
7080069	Tlcd1	0.528214	-1.89317
7331641	Lmbr1l	0.545197	-1.8342
7097583	Clip2	0.746505	-1.33958
7271832	Tram1	1.35024	1.35024
7059057	Nap1l4	0.800173	-1.24973
7055256	Olr115	1.72097	1.72097
7150132	Atp6v1b2	1.13099	1.13099
7241209	Olr482	1.32771	1.32771
7241038	Tfpi	1.98385	1.98385
7384924	Bcap31	1.22933	1.22933
7330647	Mapk12	0.815401	-1.22639
7115201	Rrp15	1.56873	1.56873
7292967	Mfn2	1.29417	1.29417
7096501	Znf394	0.725438	-1.37848
7315848	Dctn2	1.30185	1.30185
7047295	V1rf2	1.43588	1.43588
7029720	Arhgef1	0.675432	-1.48053
7179756	MAST1	0.640469	-1.56136
7098244	Psmd9	1.18085	1.18085
7220784	Agpat1	0.821765	-1.21689
7322611	Akap8l	0.528334	-1.89274
7329037	Eef1d	1.31351	1.31351
7068510	Pmp22	1.45485	1.45485
7322873	Rab11b	0.82581	-1.21093
7038189	Olr300	0.516606	-1.93571
7095321	Tssk2	1.654	1.654
7096975	Adap1	0.660446	-1.51413
7102680	Hrk	0.476036	-2.10068
7101374	Rfc2	0.573651	-1.74322
7349569	Uba5	1.60274	1.60274
7059249	Fadd	0.401579	-2.49017
7350915	Gorasp1	0.744178	-1.34376
7350181	Ptpn23	1.14002	1.14002
7042049	Hps1	0.815989	-1.22551
7323736	Slc25a3	1.55624	1.55624
7280628	Id3	1.45052	1.45052
7105289	Adipor1	1.29814	1.29814
7357566	Cops8	1.43513	1.43513
7345453	Sdhd	1.22698	1.22698
7272407	Fam110b	0.659581	-1.51611
7351047	Ccbp2	0.764219	-1.30852
7170723	Lmnb1	0.659198	-1.51699
7060230	Asrgl1	0.874227	-1.14387
7039632	Fads3	1.52659	1.52659
7215359	Cyr61	1.21043	1.21043
7311750	Atp5b	1.29993	1.29993
7349293	Pik3cb	0.83005	-1.20475
7107916	Pigm	1.49526	1.49526
7350070	Arih2	1.29279	1.29279
7065857	Axin1	1.58812	1.58812
7253125	Casp2	0.563785	-1.77373
7176795	Mc5r	2.37637	2.37637
7072241	Cntnap1	0.712796	-1.40293
7311642	Mtm1	0.783596	-1.27617
7152145	Tmem66	1.34	1.34
7306041	Lrrn3	1.68195	1.68195
7377732	Hprt1	1.97591	1.97591
7048688	Tomm40	1.15344	1.15344
7377029	Armcx1	0.701409	-1.4257
7340657	Cspg5	0.703035	-1.4224
7138066	Slc7a8	1.14849	1.14849
7310777	Akt1	1.30004	1.30004
7194423	Sucnr1	1.6161	1.6161
7237383	Wdr34	0.847835	-1.17947
7315539	Gns	0.766086	-1.30534
7195530	Plrg1	1.62538	1.62538
7225321	Bmyc	0.565389	-1.76869
7073775	RGD1306284	0.74851	-1.33599
7319094	Ep300	1.60603	1.60603
7254827	St3gal5	1.46414	1.46414
7210559	Ntrk1	0.829458	-1.20561
7323193	Tcp11l2	1.57028	1.57028
7142829	Anxa11	1.35519	1.35519
7060298	Dagla	0.726091	-1.37724
7225689	Tsc1	0.797027	-1.25466
7220581	Bat1	1.42973	1.42973
7065524	Rnps1	1.2772	1.2772
7169578	Pcdhb20	0.684624	-1.46066
7213191	Rtcd1	1.27908	1.27908
7262948	LOC500054	0.68671	-1.45622
7220903	Tap2	0.73159	-1.36689
7113836	Uhmk1	0.756179	-1.32244
7199859	Tspan5	0.753389	-1.32733
7181553	Mlycd	0.80215	-1.24665
7034633	Stard10	0.658355	-1.51894
7062424	Pdlim1	1.28444	1.28444
7067839	Cnot8	0.771006	-1.29701
7055136	Nup98	1.36602	1.36602
7113161	RGD1309106	0.755413	-1.32378
7191464	Dap	1.40178	1.40178
7375379	Rab1b-ps1	1.53971	1.53971
7175050	Lars	1.57168	1.57168
7321167	Hnrnpa1	0.469175	-2.1314
7259088	Cdkn1b	0.687559	-1.45442
7217050	Syngap1	0.712991	-1.40254
7344730	Hmbs	0.790167	-1.26556
7342986	S1pr5	0.448614	-2.22909
7220923	Tap1	0.731907	-1.36629
7278654	Faah	0.73868	-1.35377
7256257	Nr2c2	0.760571	-1.3148
7098801	Pebp1	1.59163	1.59163
7039115	Yif1	0.671562	-1.48907
7184205	Ddx39	1.88329	1.88329
7132846	Clu	1.23698	1.23698
7356172	Ankzf1	0.670719	-1.49094
7319366	Tspo	1.6192	1.6192
7114038	Nit1	1.33671	1.33671
7068280	Llgl1	0.614483	-1.62738
7268728	Olr832	0.567574	-1.76189
7097772	Sbds	1.83241	1.83241
7180762	Cirh1a	1.57421	1.57421
7286124	RGD1307218	0.676469	-1.47827
7155237	Ubqln1	1.28409	1.28409
7088631	Dirc2	1.31225	1.31225
7216840	Stk19	1.44681	1.44681
7171365	Nedd4l	0.757809	-1.31959
7042413	Lzts2	0.697548	-1.43359
7067595	Irf1	0.546385	-1.83021
7208620	Ufm1	1.74097	1.74097
7043433	Casp7	0.498145	-2.00745
7120673	Dbnl	0.72332	-1.38251
7247744	Slpi	1.82411	1.82411
7379985	Prickle3	0.807039	-1.2391
7228402	Dhrs9	1.93529	1.93529
7325429	Nup107	0.584355	-1.71129
7051090	Cyth2	1.38298	1.38298
7246904	Eif2s2	1.70303	1.70303
7303147	Prepl	0.73273	-1.36476
7278755	Tesk2	1.66538	1.66538
7116938	Cxcl9	0.740684	-1.3501
7048801	RGD1311107	1.52215	1.52215
7103068	Ficd	0.647164	-1.5452
7176416	Ecg2	0.661613	-1.51146
7108170	Sdccag8	0.661125	-1.51257
7279564	Psmb2	1.48151	1.48151
7101579	Crcp	1.42851	1.42851
7198615	F3	1.51618	1.51618
7312123	Olr1063	1.60436	1.60436
7378604	G6pd	1.26843	1.26843
7031732	Ldha	1.52794	1.52794
7072801	Kcnh6	0.760927	-1.31419
7068450	Pigl	0.639347	-1.5641
7149693	Bst2	0.497418	-2.01038
7335436	Mcam	0.635398	-1.57382
7352877	Lmbrd1	0.787559	-1.26975
7108048	Olr1600	1.68636	1.68636
7375891	Efnb1	1.35207	1.35207
7198705	Fabp2	0.649257	-1.54022
7279526	Trappc3	0.650944	-1.53623
7342716	Olr1129	1.29902	1.29902
7325331	Cct2	1.2059	1.2059
7374532	Msl3l1	0.769801	-1.29904
7107784	Dedd	1.46476	1.46476
7110790	Cxcr4	0.703215	-1.42204
7246748	Pdrg1	1.33461	1.33461
7039943	Olr365	1.66084	1.66084
7030524	U2af1l4	0.667068	-1.4991
7083059	Gfap	0.816297	-1.22504
7350294	Mlh1	0.649899	-1.5387
7105238	Chi3l1	1.23423	1.23423
7234293	Dynlrb1	1.50862	1.50862
7074684	Abat	0.624581	-1.60107
7143351	Ncoa4	1.25733	1.25733
7237876	Rab14	1.49459	1.49459
7176958	Rab27b	1.45531	1.45531
7239292	Wdsub1	0.59618	-1.67734
7038859	Mtl5	0.711435	-1.40561
7180694	Prmt7	0.756764	-1.32142
7226521	Dab2ip	0.587128	-1.70321
7174262	Nrep	0.513145	-1.94877
7300271	Eif2b2	0.688744	-1.45192
7354888	Bzw1	1.2278	1.2278
7131310	Apex1	0.743516	-1.34496
7101557	MGC94190	1.2311	1.2311
7266324	Reg3g	1.4186	1.4186
7318949	Atf4	2.52309	2.52309
7054851	Dgat2	1.29589	1.29589
7062809	Zfyve27	1.31814	1.31814
7080291	Git1	1.26449	1.26449
7241810	Gyltl1b	0.575243	-1.7384
7321415	Suox	0.519512	-1.92488
7072219	Coasy	0.672988	-1.48591
7321666	Olr1006	1.7021	1.7021
7255431	Gcs1	0.666895	-1.49949
7100653	Mafk	2.69031	2.69031
7233928	Csnk2a1	0.793027	-1.26099
7060790	Cep78	0.774592	-1.291
7301033	Psmc1	1.43349	1.43349
7318292	rCG_59505	0.719884	-1.38911
7241424	Olr670	0.551201	-1.81422
7101269	Zp3	1.26891	1.26891
7226454	Hspa5	1.28109	1.28109
7315656	Ppm1h	0.471731	-2.11985
7177469	Slc14a1	1.65821	1.65821
7294700	Slc3a1	0.778759	-1.28409
7057205	Nfatc2ip	0.692456	-1.44413
7363165	Crygc	1.62662	1.62662
7129902	Anxa7	2.30838	2.30838
7337320	Mtfmt	0.633128	-1.57946
7147279	Xkr5	0.586399	-1.70532
7381031	Gemin8	0.598628	-1.67049
7106559	Tor1aip2	0.694622	-1.43963
7062539	Opalin	1.22129	1.22129
7120275	Letm1	0.804153	-1.24354
7305728	Ahr	1.19419	1.19419
7309171	Dio2	2.08487	2.08487
7082684	Acly	0.920206	-1.08671
7064228	Vax1	0.716873	-1.39495
7295601	Preb	0.736661	-1.35748
7232482	Polr1b	0.691154	-1.44686
7173510	Cdh2	1.18399	1.18399
7133737	Elf1	1.49487	1.49487
7203120	Pik3r1	0.564711	-1.77082
7075942	Bnip1	0.791429	-1.26354
7046634	Sft2d1	1.40341	1.40341
7129420	LOC364236	2.30686	2.30686
7314646	Lin7a	0.724762	-1.37976
7362008	Stat1	0.593432	-1.68511
7349791	Tex264	0.69327	-1.44244
7247742	Slpil3	1.33368	1.33368
7029684	Ceacam6	0.781058	-1.28031
7265600	Gadd45a	1.69505	1.69505
7376334	Atp7a	0.8554	-1.16904
7379994	Syp	0.841839	-1.18788
7080062	Rab34	1.33684	1.33684
7053946	Vom2r40	1.76445	1.76445
7270269	Prpg1	0.654533	-1.52781
7275723	Slc31a1	0.812599	-1.23062
7379734	Mid1ip1	1.45178	1.45178
7305759	Bzw2	1.33557	1.33557
7095081	Ap2m1	1.21495	1.21495
7026365	Trip13	0.730229	-1.36943
7139099	Mtmr9	0.612535	-1.63256
7067986	Olr1445	0.783435	-1.27643
7037519	Acadsb	1.24715	1.24715
7183815	Gpt2	0.568525	-1.75894
7228581	Gorasp2	1.21537	1.21537
7039936	Olr357	0.516204	-1.93722
7029113	Slc1a5	1.44785	1.44785
7030425	Zfp260	2.13707	2.13707
7032152	Gabrb3	0.709052	-1.41033
7145003	Galnt7	0.66957	-1.4935
7111330	Tmem183a	1.45643	1.45643
7104790	Yod1	2.23615	2.23615
7259555	Pde3a	0.672643	-1.48667
7116906	Scarb2	0.668553	-1.49577
7096049	Xab2	1.15327	1.15327
7219905	Atg5	2.05578	2.05578
7067802	Galnt10	0.724578	-1.38011
7338059	Gnb5	0.711252	-1.40597
7073939	LOC498029	0.636076	-1.57214
7229806	Olr722	0.591133	-1.69167
7164204	Agtr1	1.33876	1.33876
7364829	Nmur1	0.633486	-1.57857
7231913	Sord	0.5747	-1.74004
7043522	Trub1	0.650861	-1.53643
7155514	Dbn1	0.669426	-1.49382
7169575	Pcdhb19	0.512091	-1.95278
7365255	Hes6	0.555586	-1.7999
7115625	G0s2	0.686926	-1.45576
7221804	Cabin1	0.744116	-1.34388
7096324	Katnal1	0.676972	-1.47717
7207453	Pex5l	0.704111	-1.42023
7263238	Tmem209	0.612604	-1.63238
7117204	Gc	1.2335	1.2335
7070533	Ddx52	1.43271	1.43271
7153506	Upf3a	0.788433	-1.26834
7199147	Casp6	1.3245	1.3245
7298723	RGD1307897	0.692661	-1.44371
7311815	Cs	1.24202	1.24202
